# Supplementary material for: Downregulation of semaphorin 4A in keratinocytes reflects the features of non-lesional psoriasis
Source: eLife journal article supplement (doi:10.7554/elife.97654), 2024-05-28

# Unedited blot images

**Downregulation of Semaphorin 4A in keratinocytes reflects  
the features of non-lesional psoriasis**

Figure 6, C and D

Figure 6

**C**

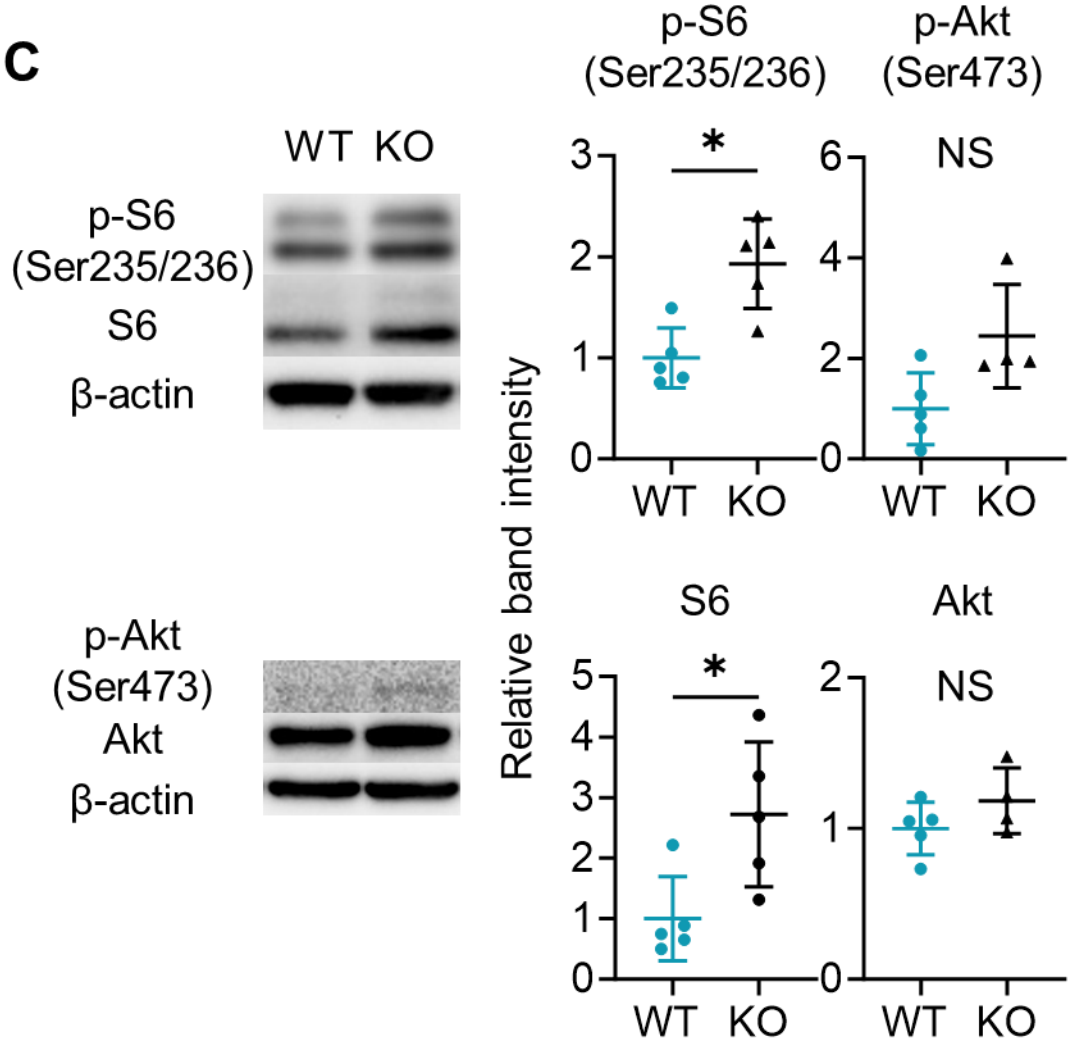

**D**

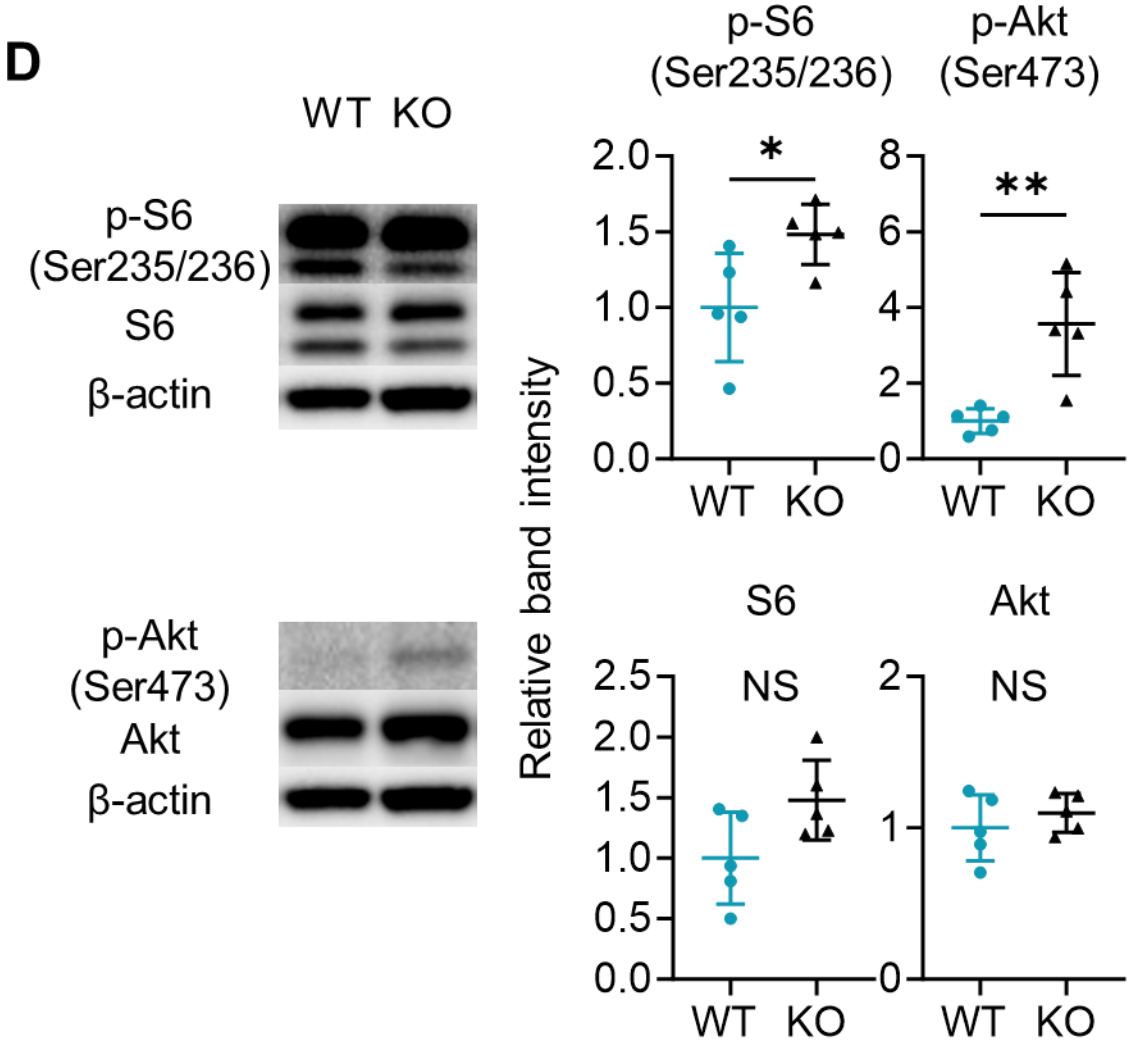

Full unedited blot for Figure 6C p-S6

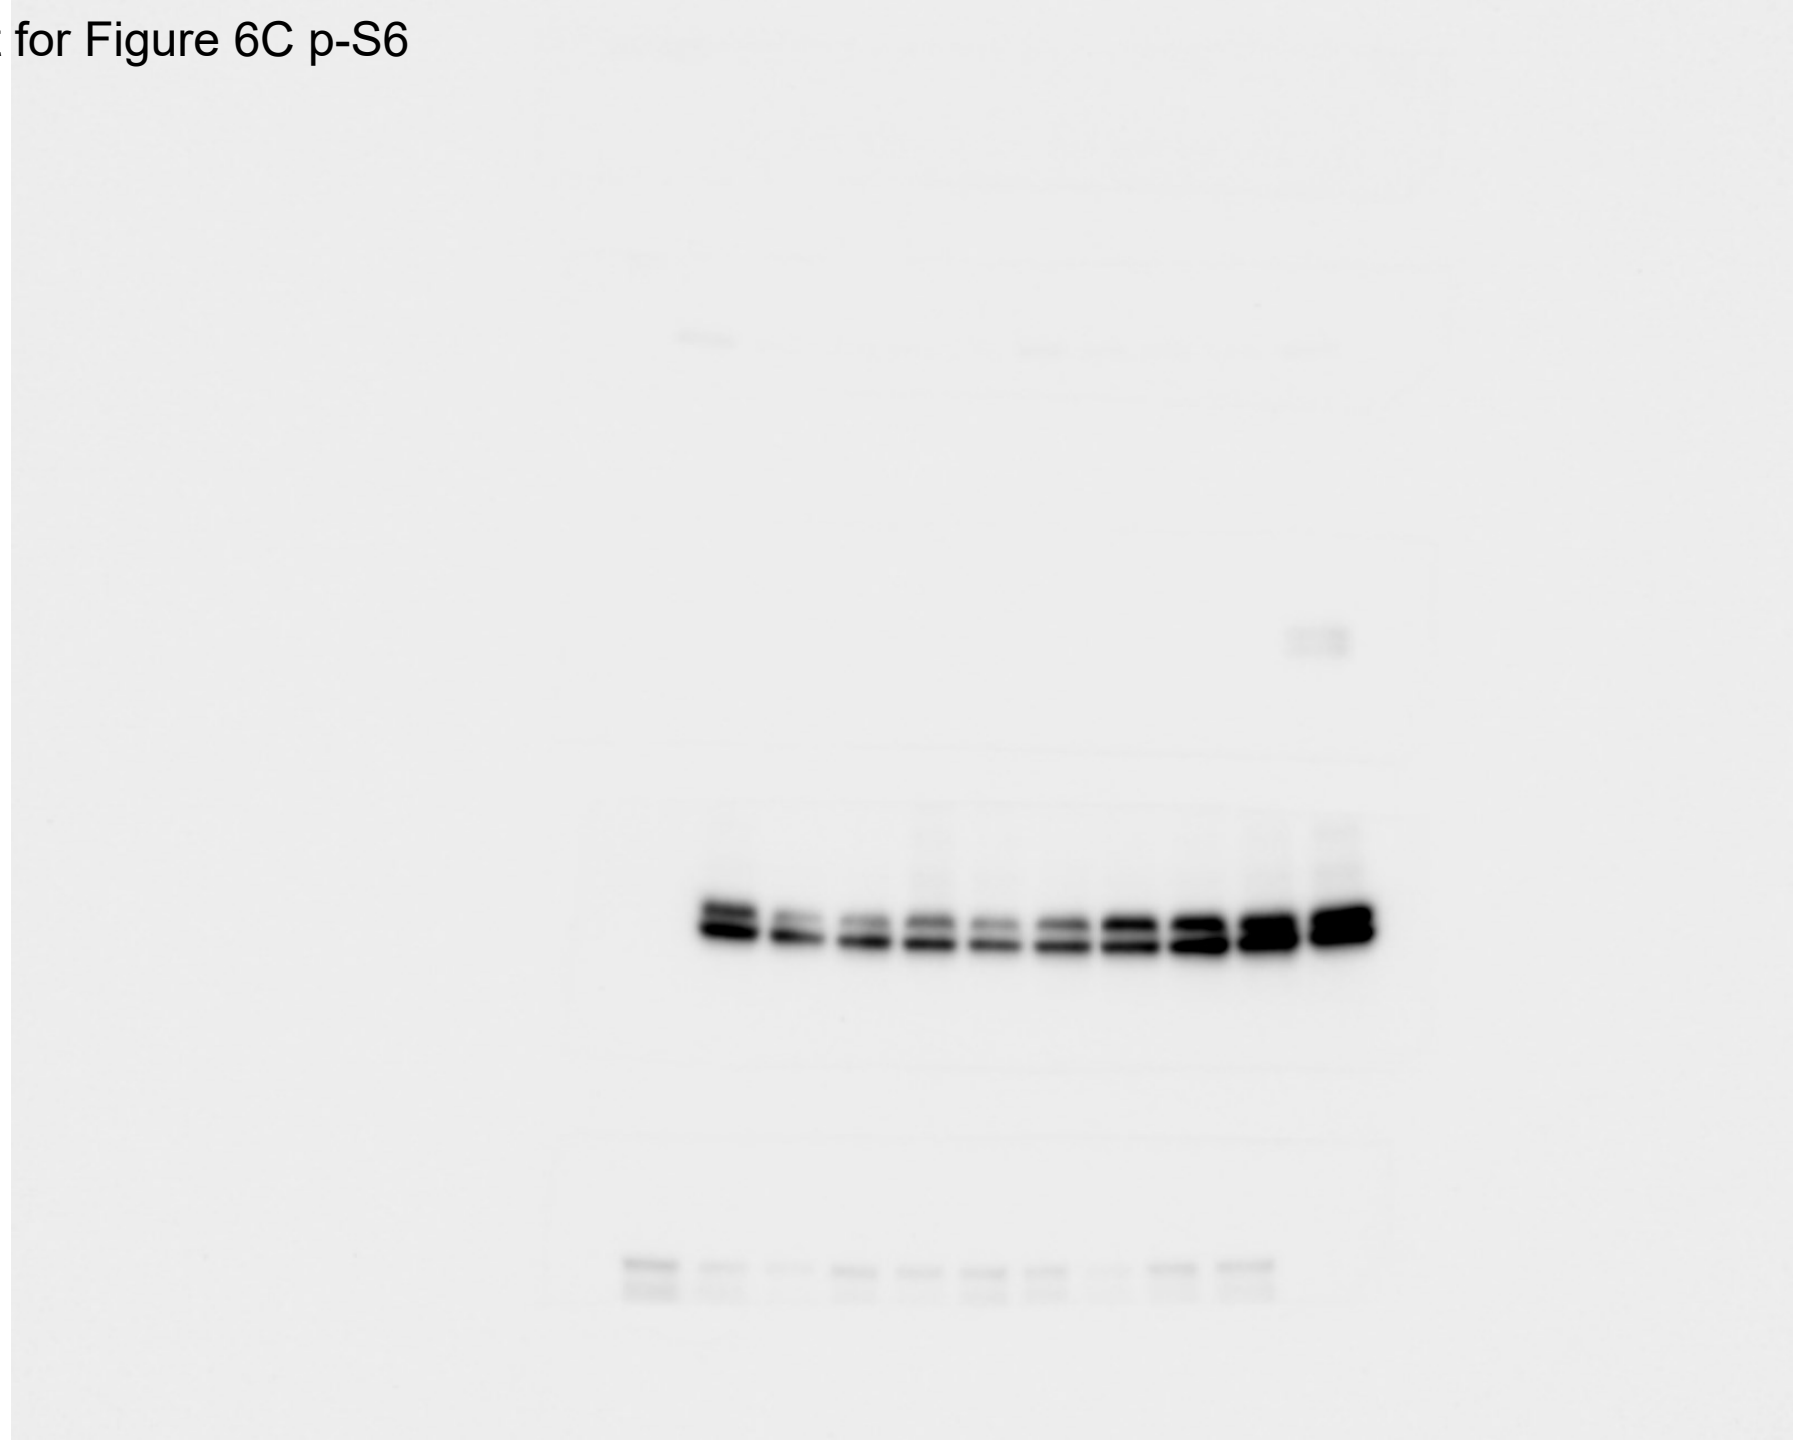

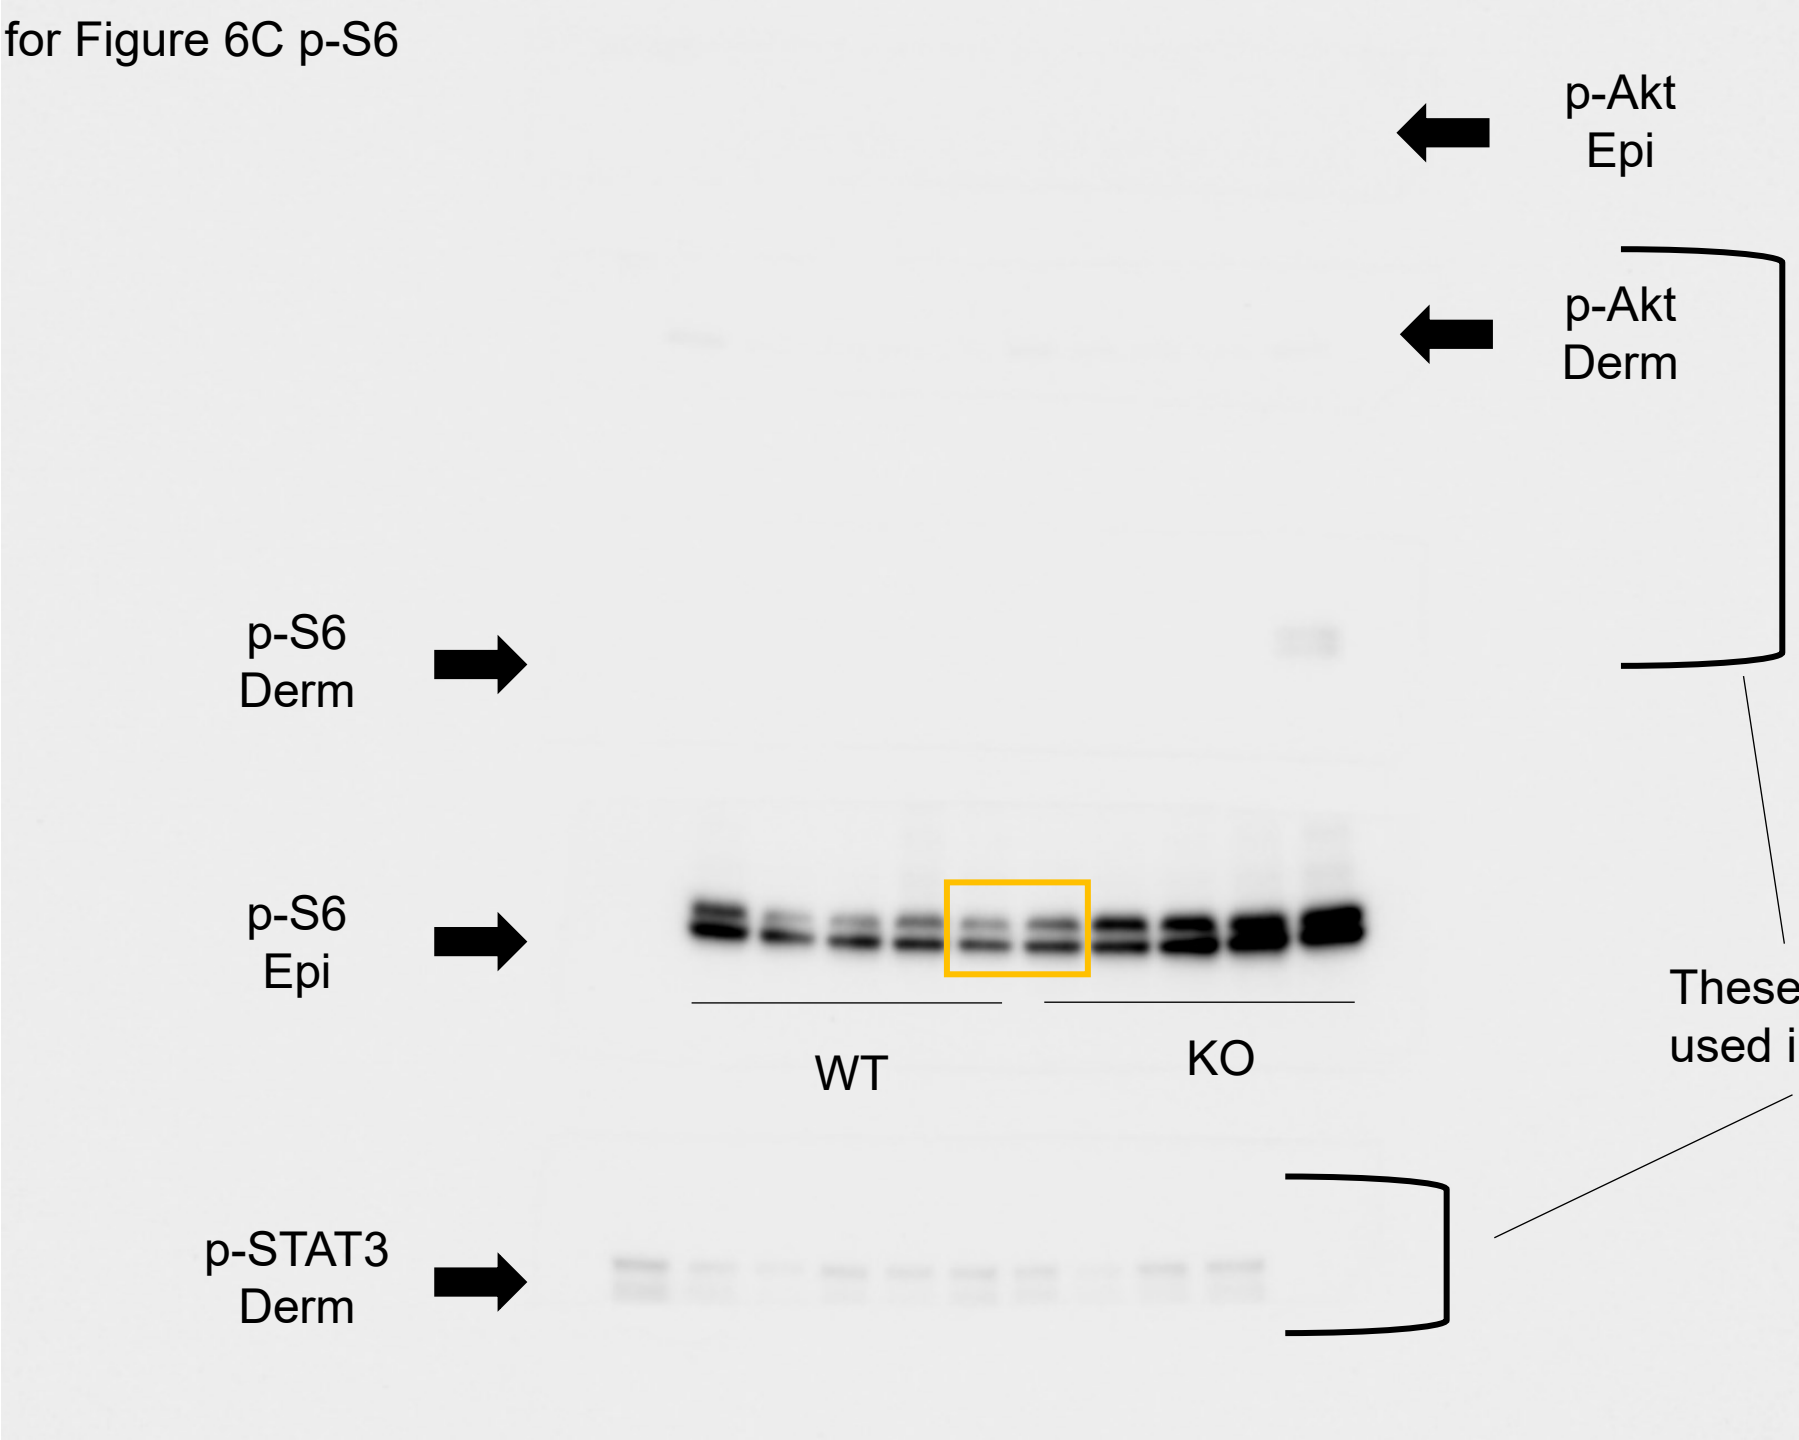

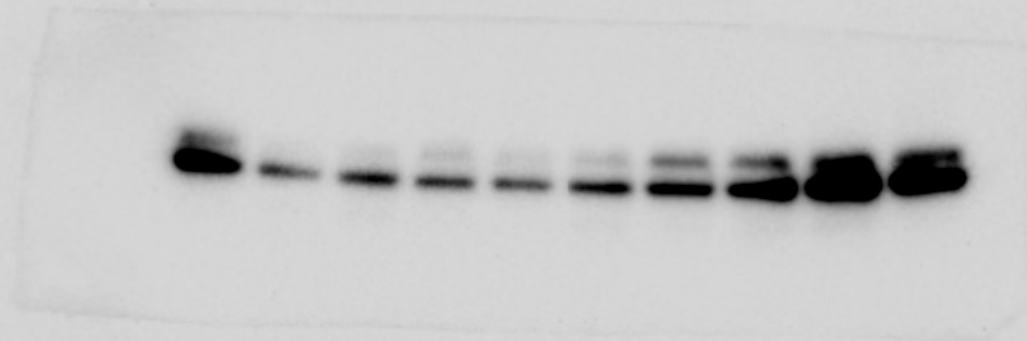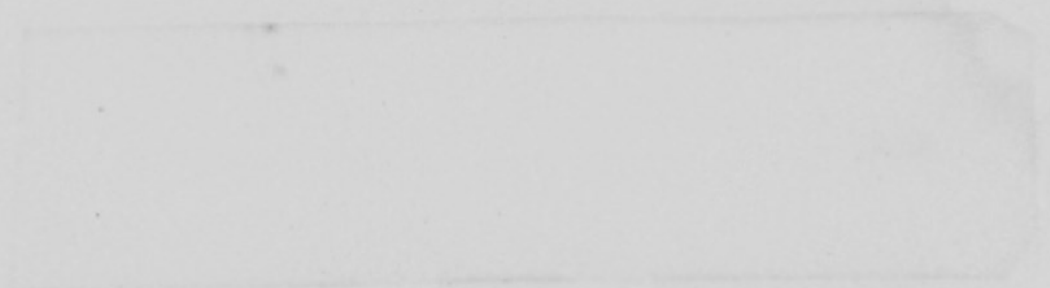

S6  
Epi

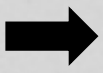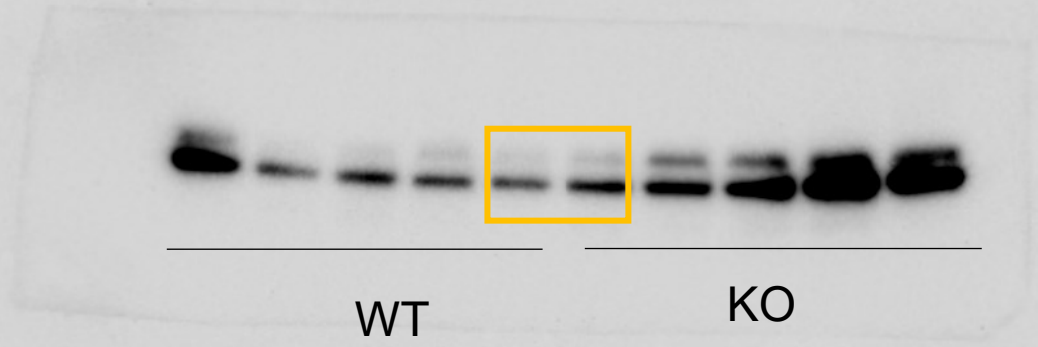

WT

KO

p-S6  
Derm

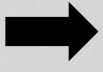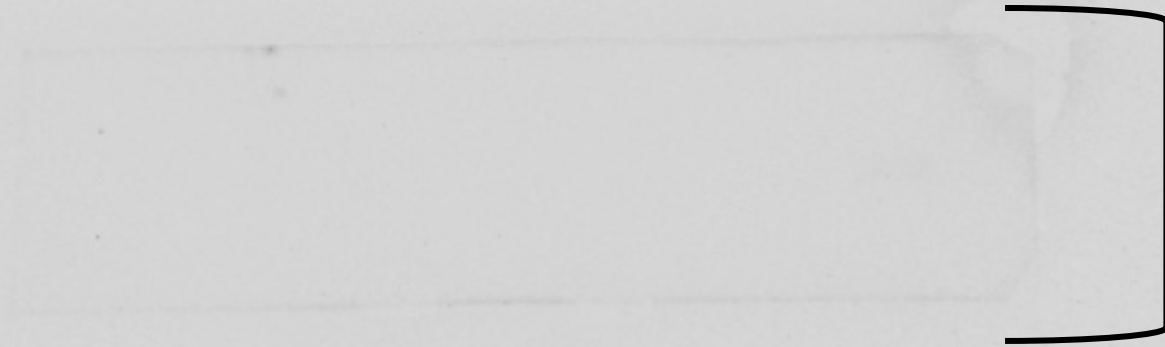

This data is not  
used in the article.

Full unedited blot for Figure 6C  $\beta$ -actin for p-S6, S6

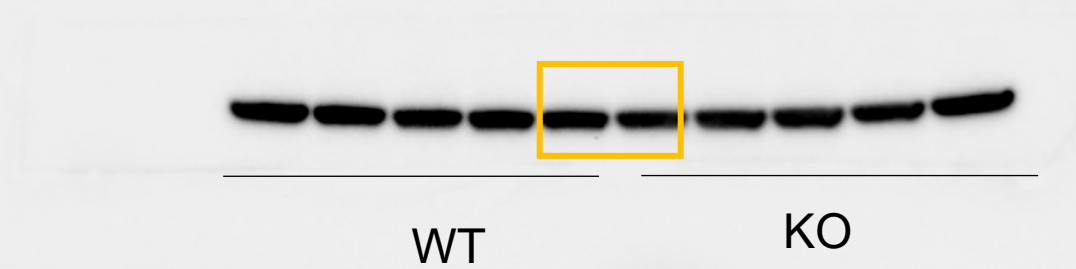

Full unedited blot for Figure 6C  $\beta$ -actin for p-S6, S6

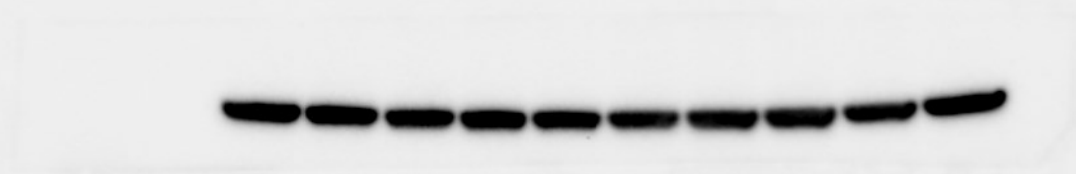



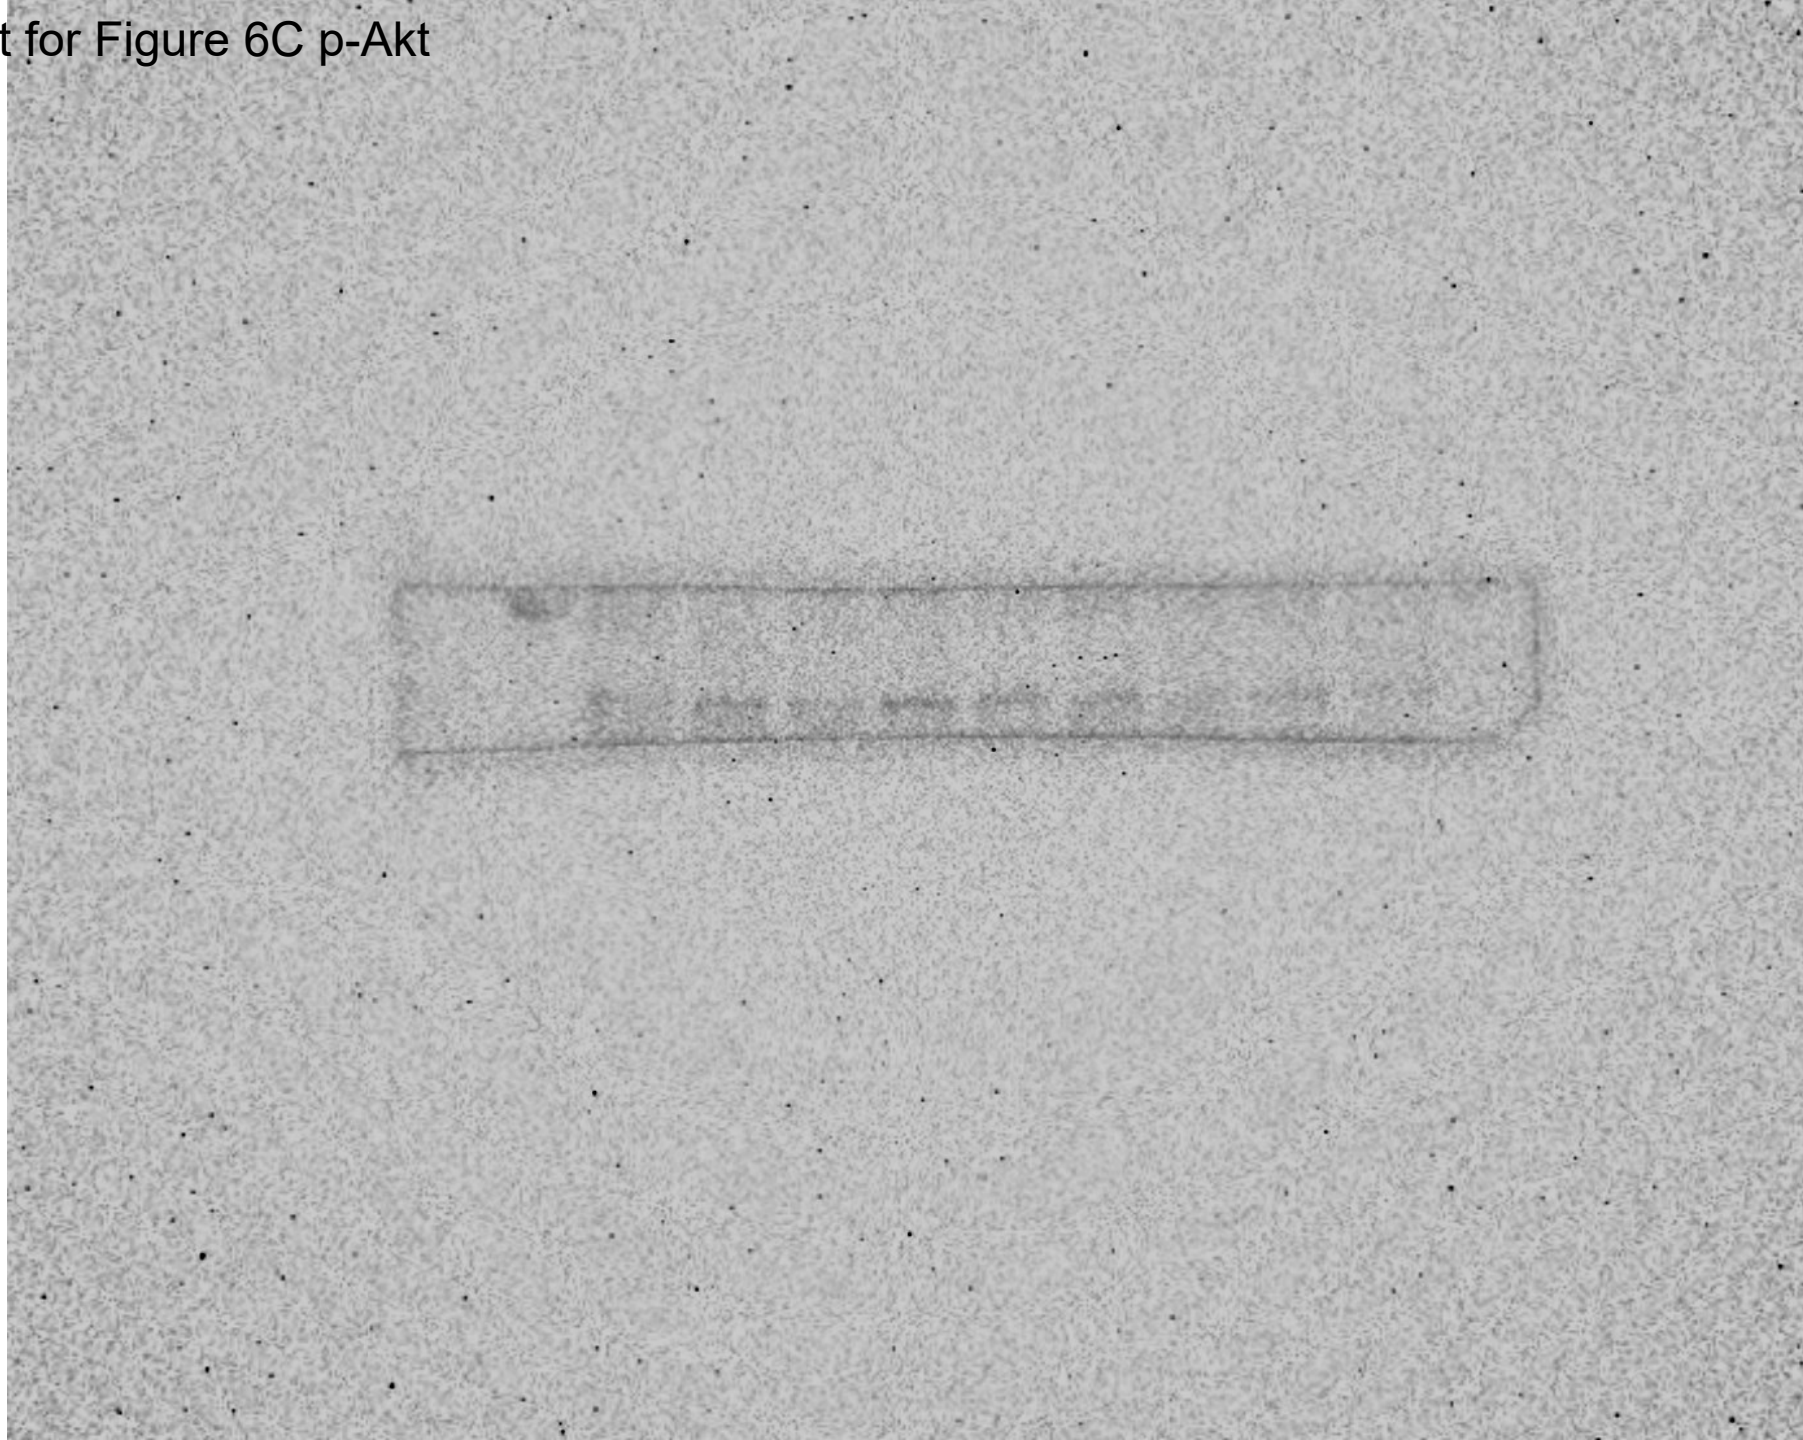

Full unedited blot for Figure 6C p-Akt

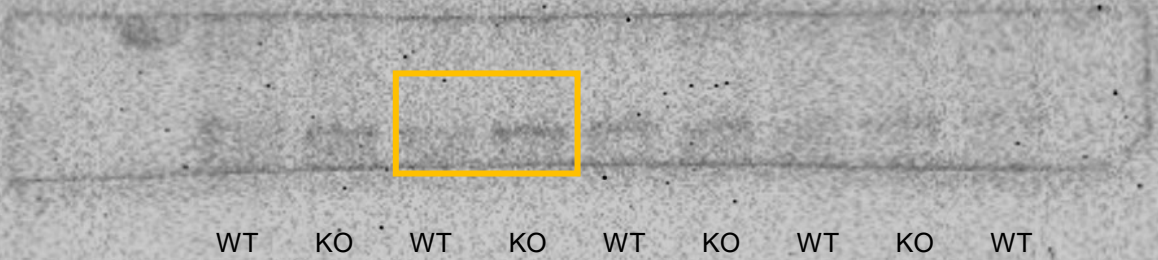

Full unedited blot for Figure 6C Akt

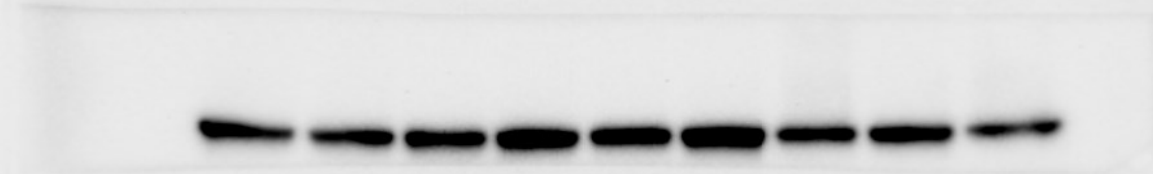

Full unedited blot for Figure 6C Akt

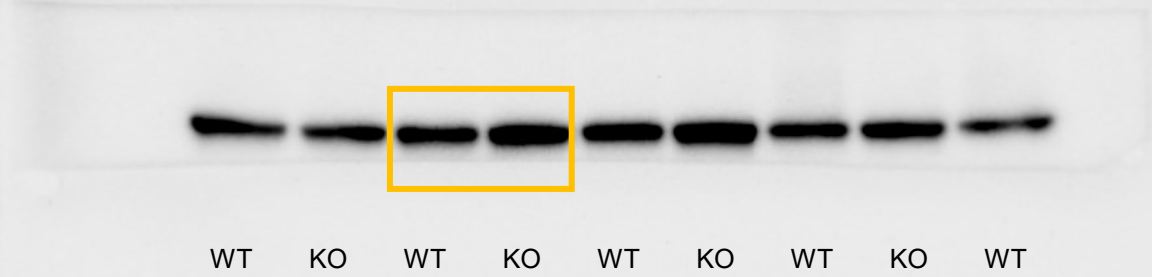



Full unedited blot for Figure 6C  $\beta$ -actin for p-Akt and Akt

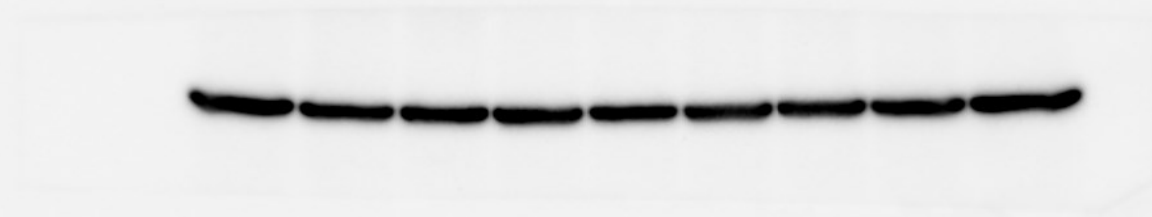

Full unedited blot for Figure 7C  $\beta$ -actin for p-Akt and Akt

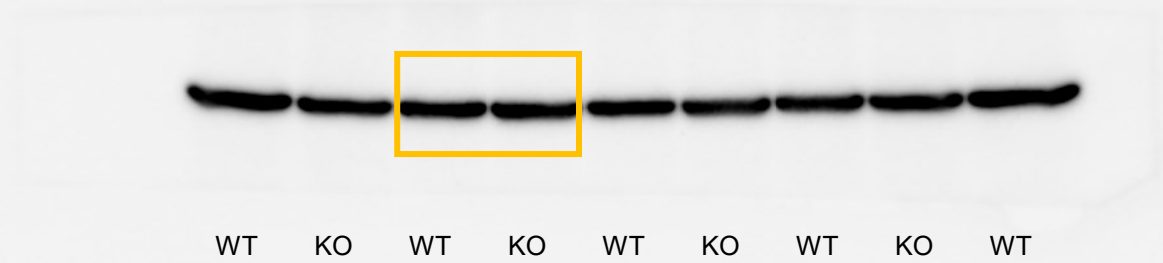

Full unedited blot for Figure 6D p-Akt and p-S6

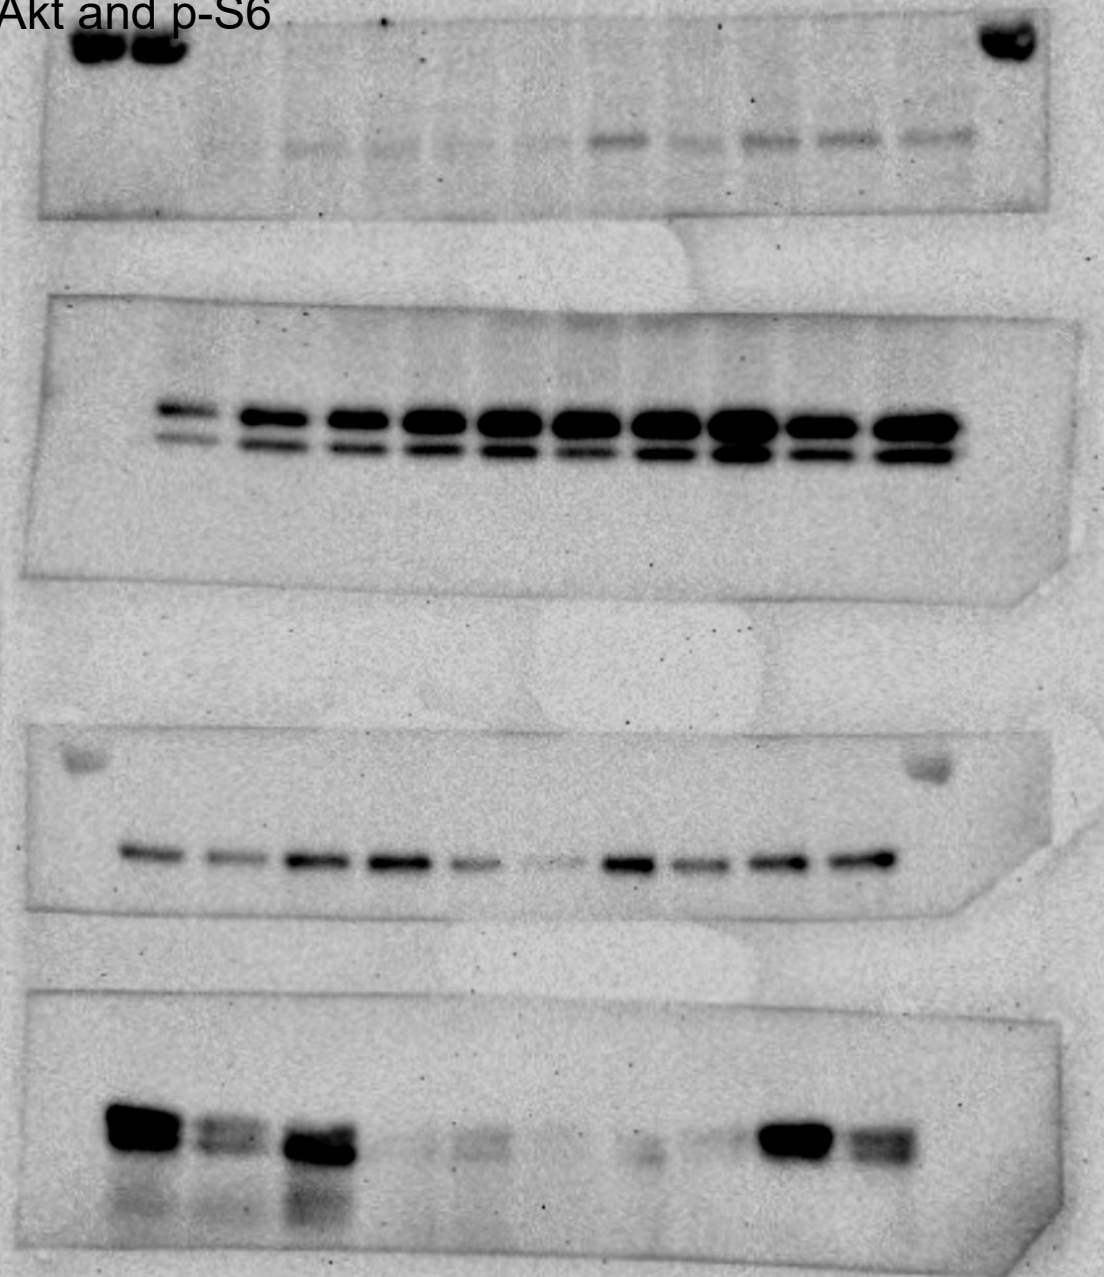

Full unedited blot for Figure 6D p-Akt and p-S6

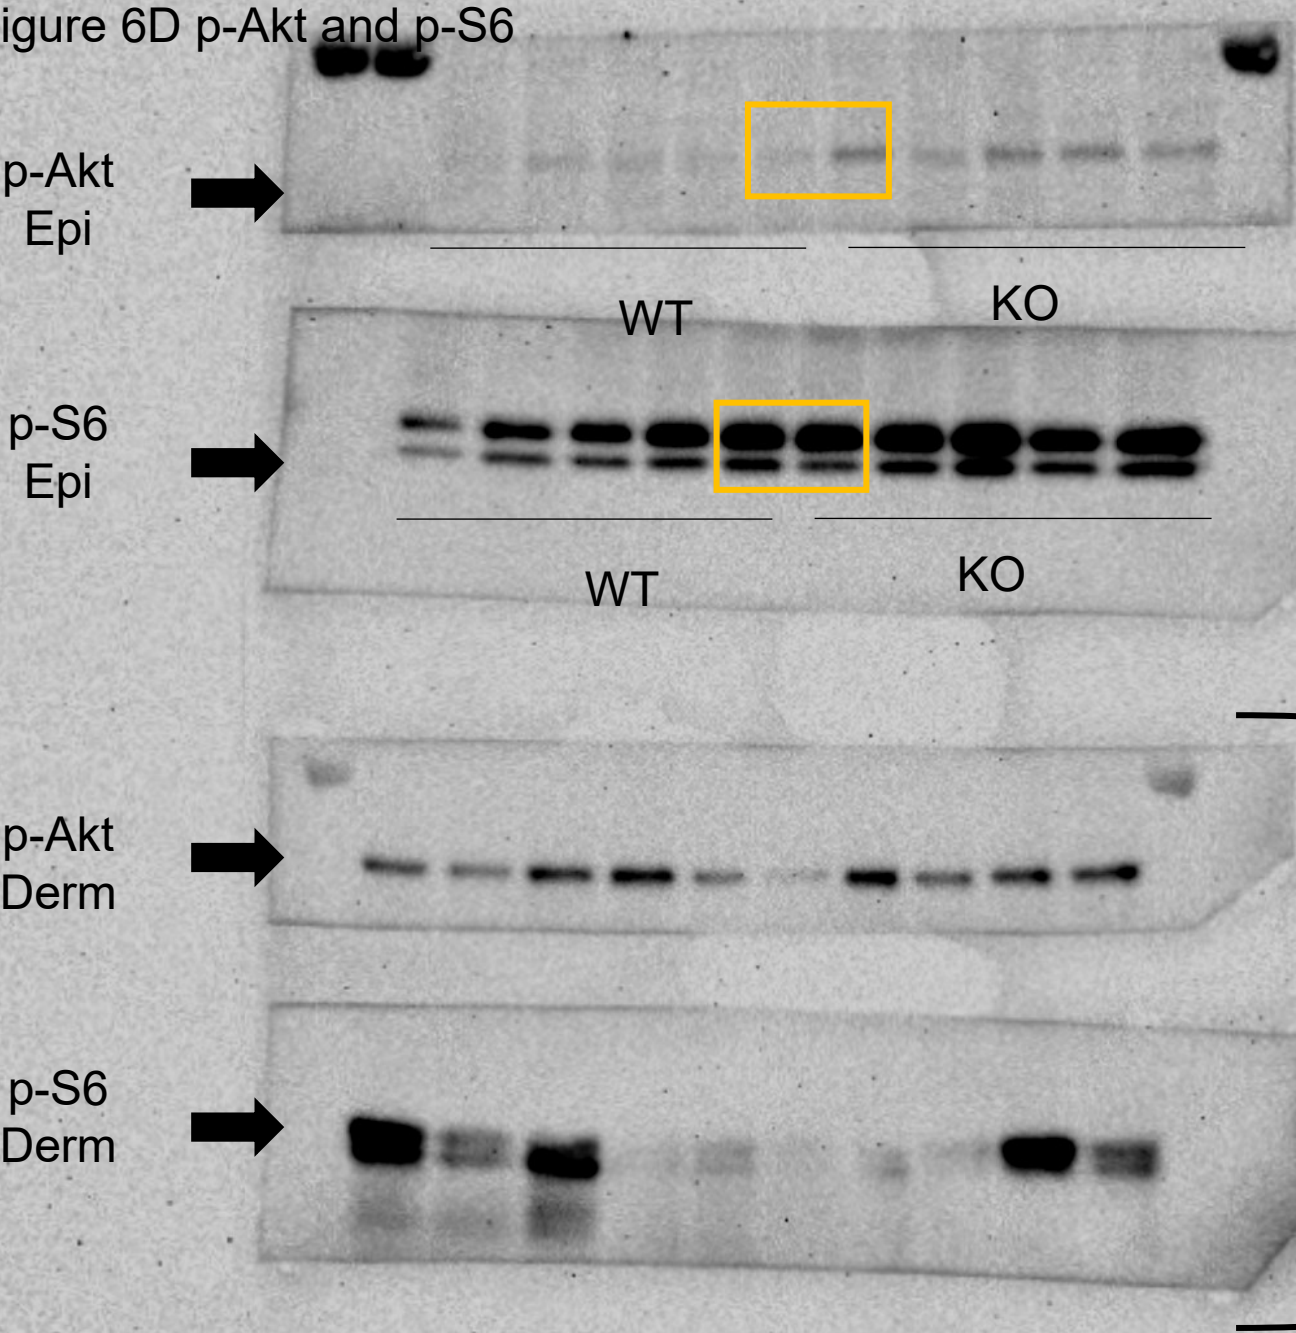

This data are not  
used in the article.



Full unedited blot for Figure 6D S6

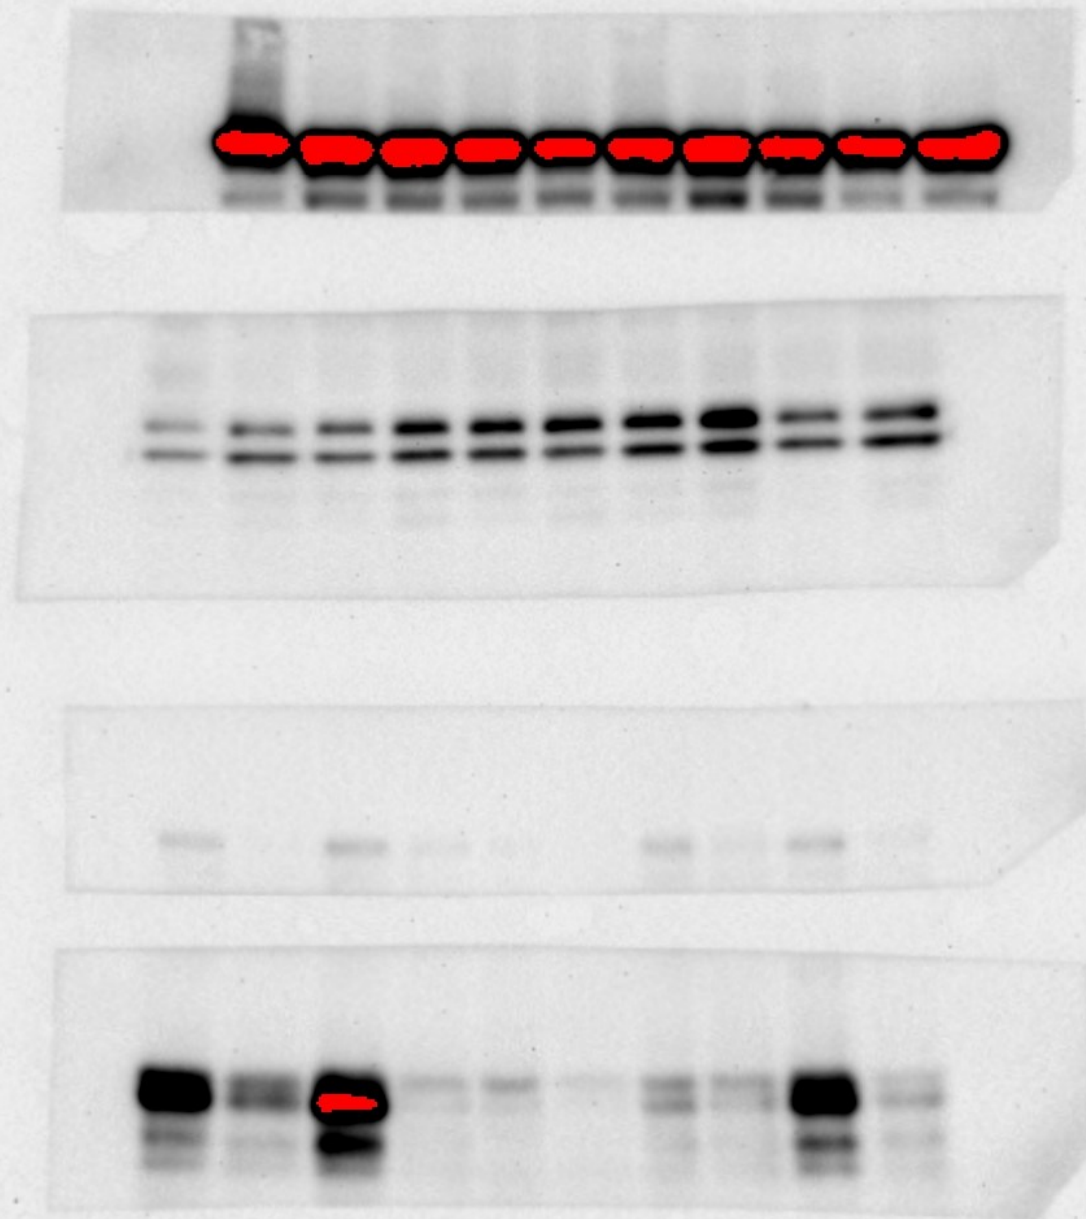

Full unedited blot for Figure 6D S6

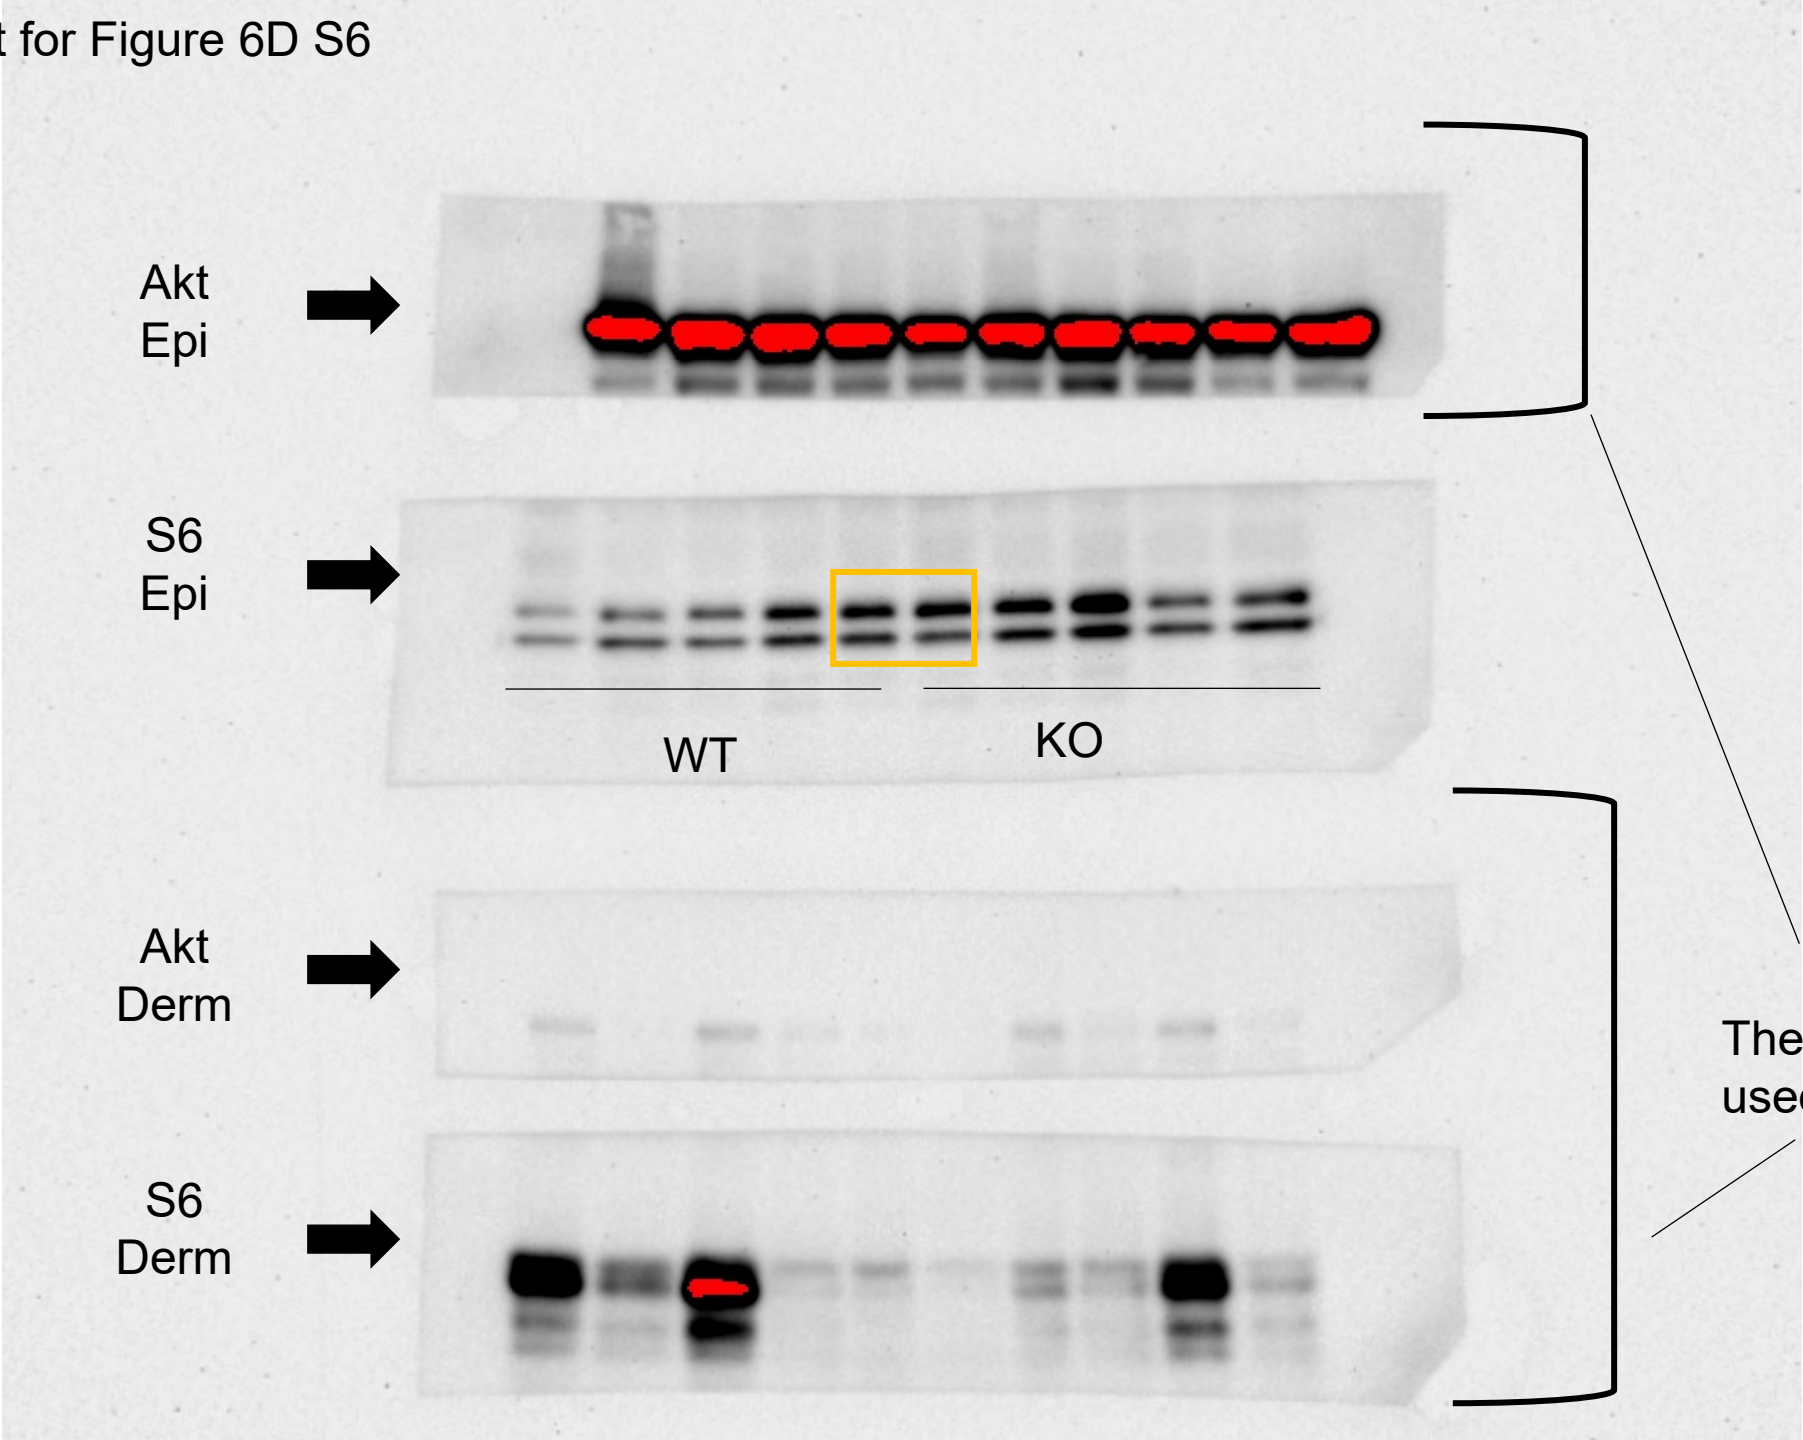

Full unedited blot for Figure 6D Akt

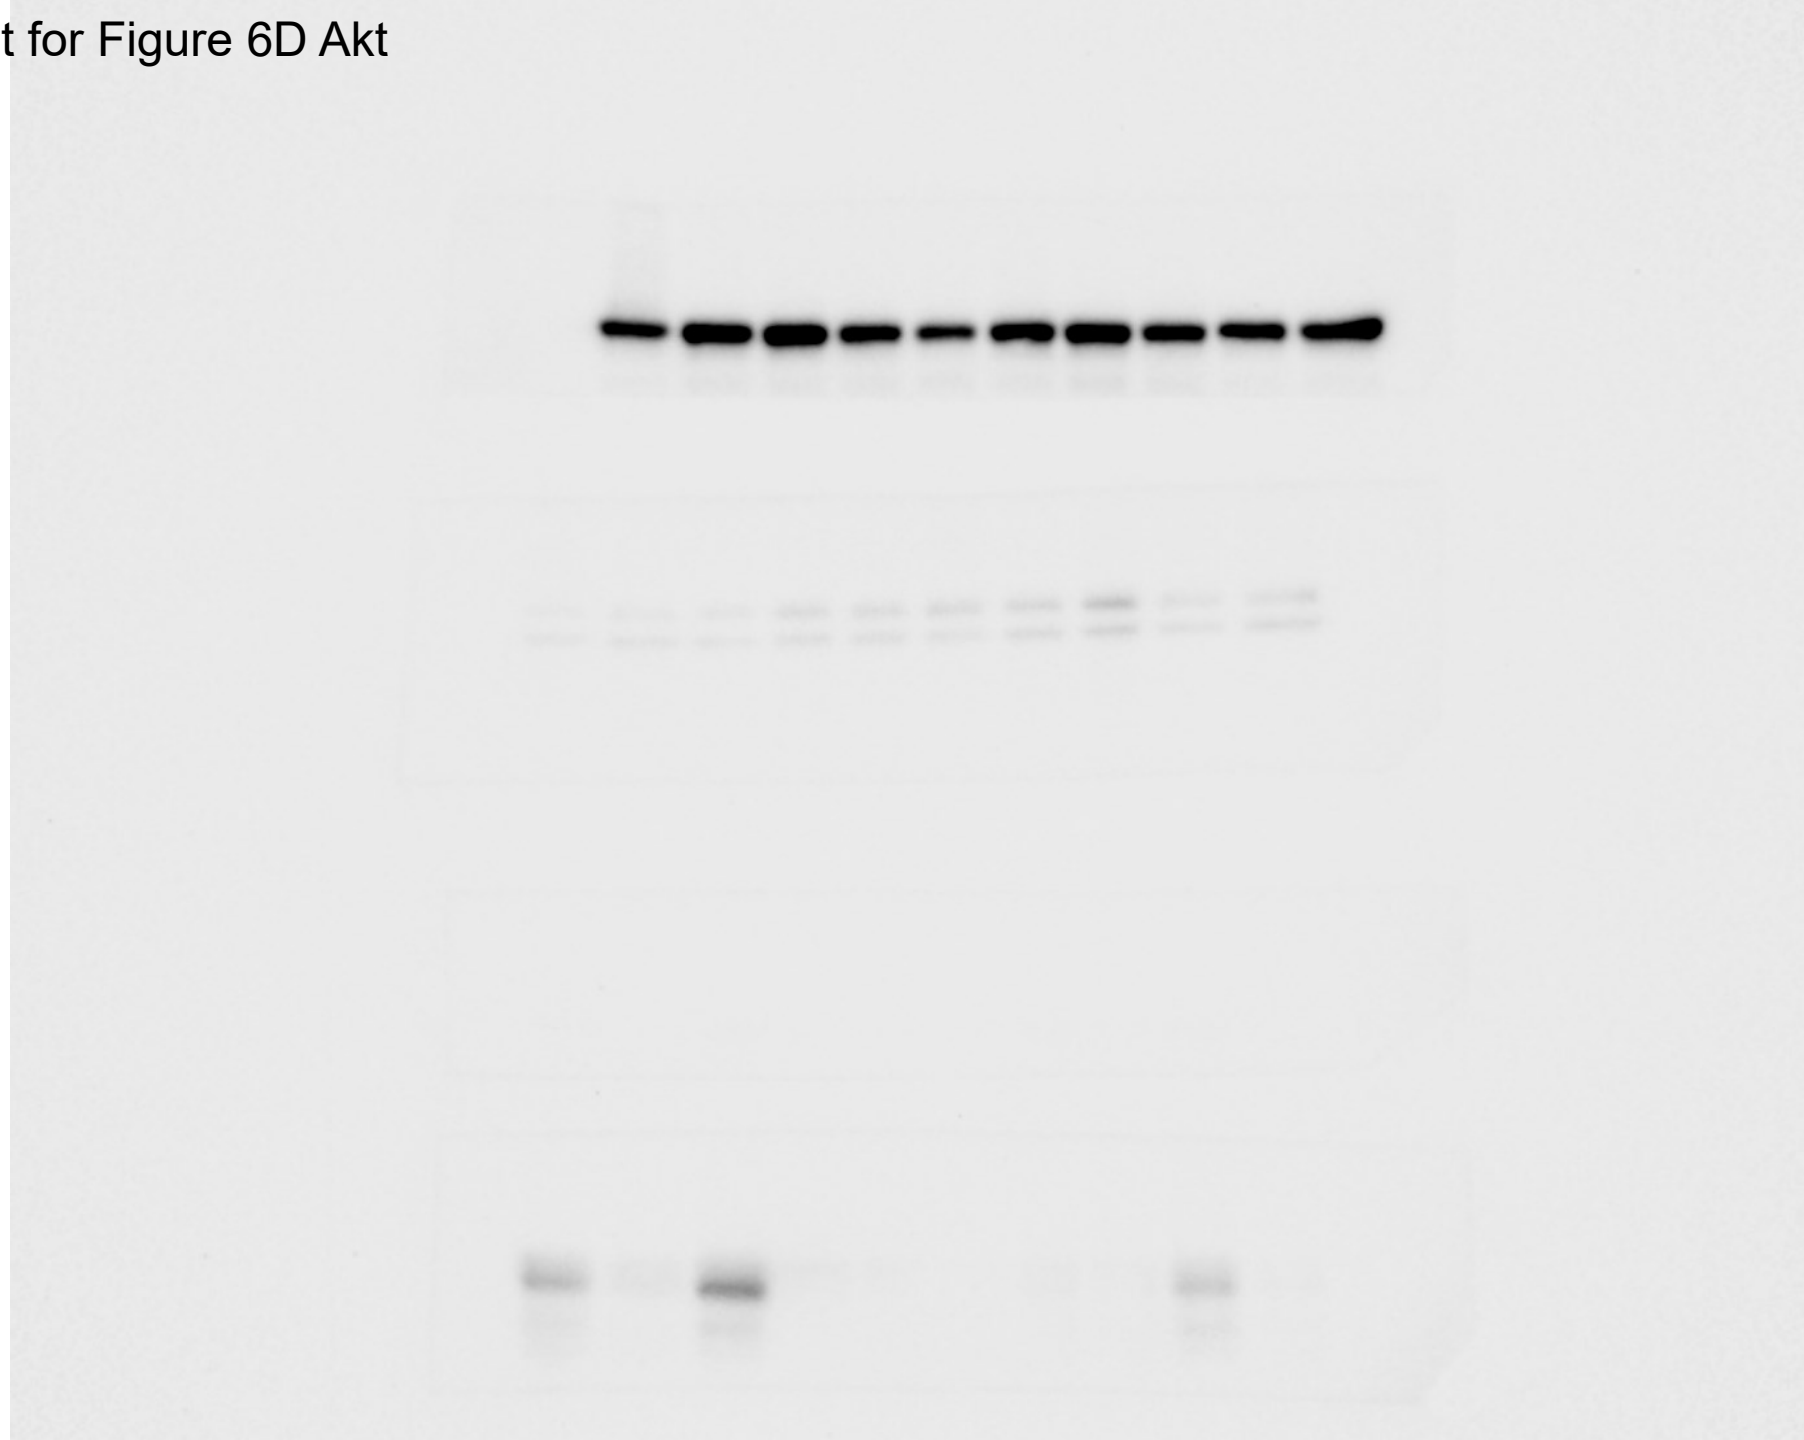

Full unedited blot for Figure 6D Akt

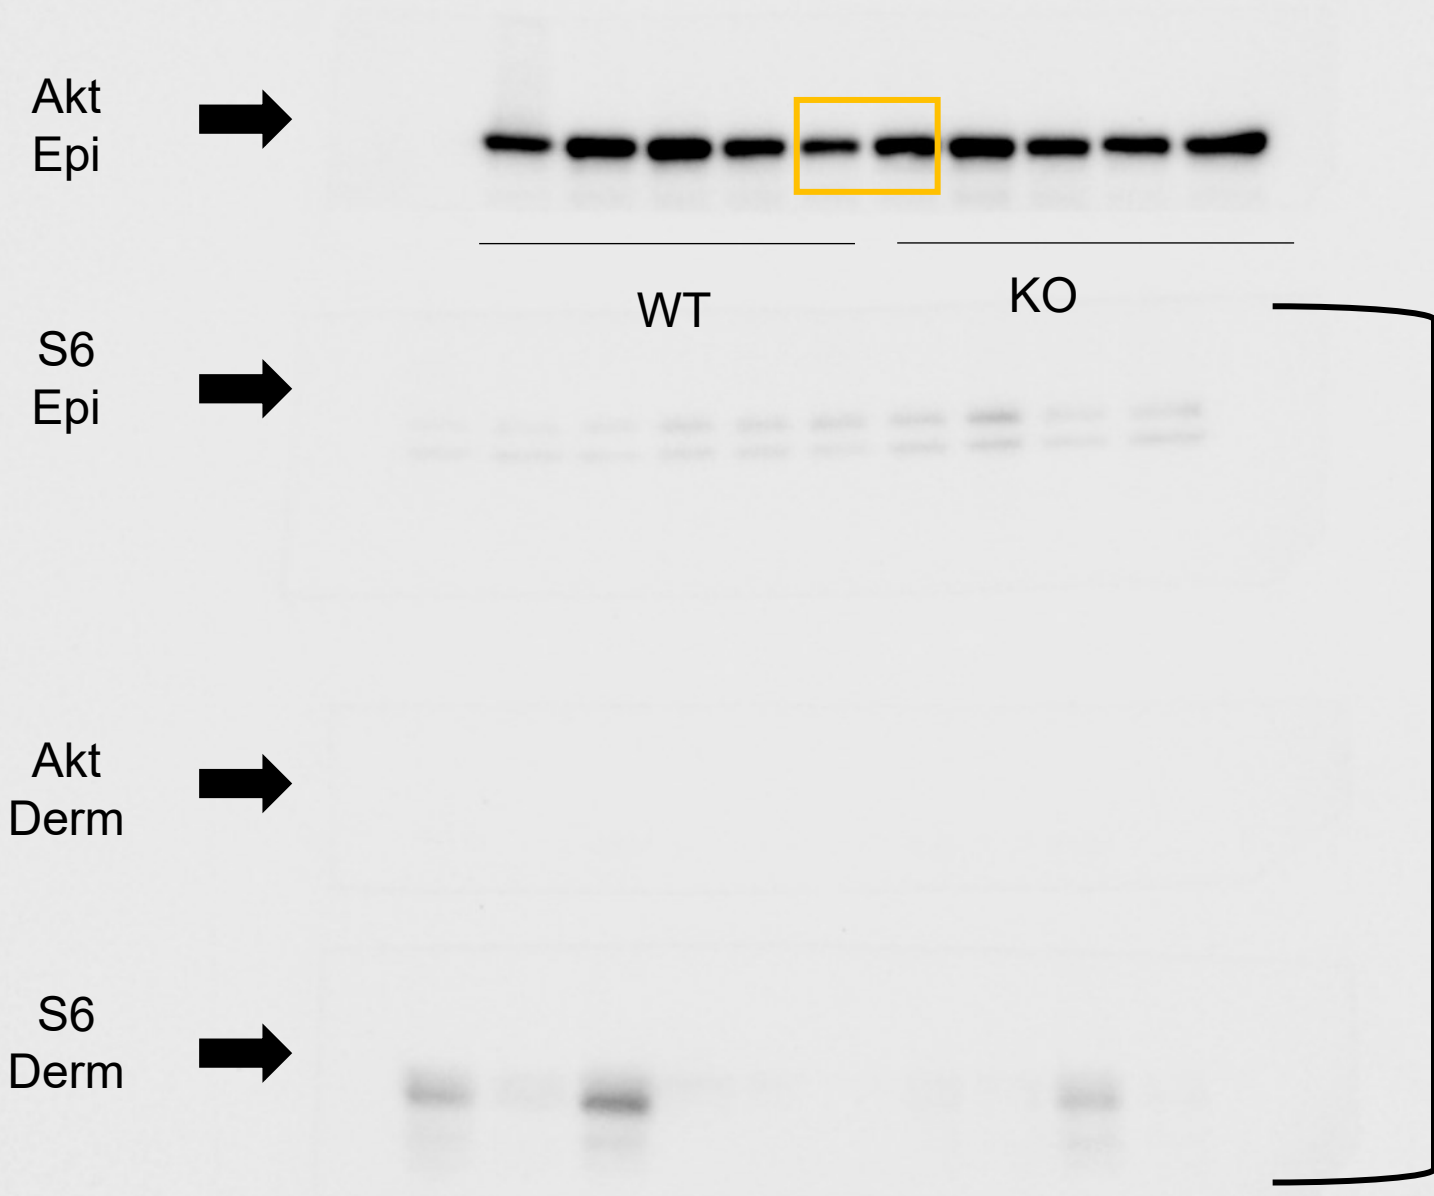

These data are not used in the article.

Full unedited blot for Figure 6D  $\beta$ -actin for p-S6, S6, p-Akt, and Akt

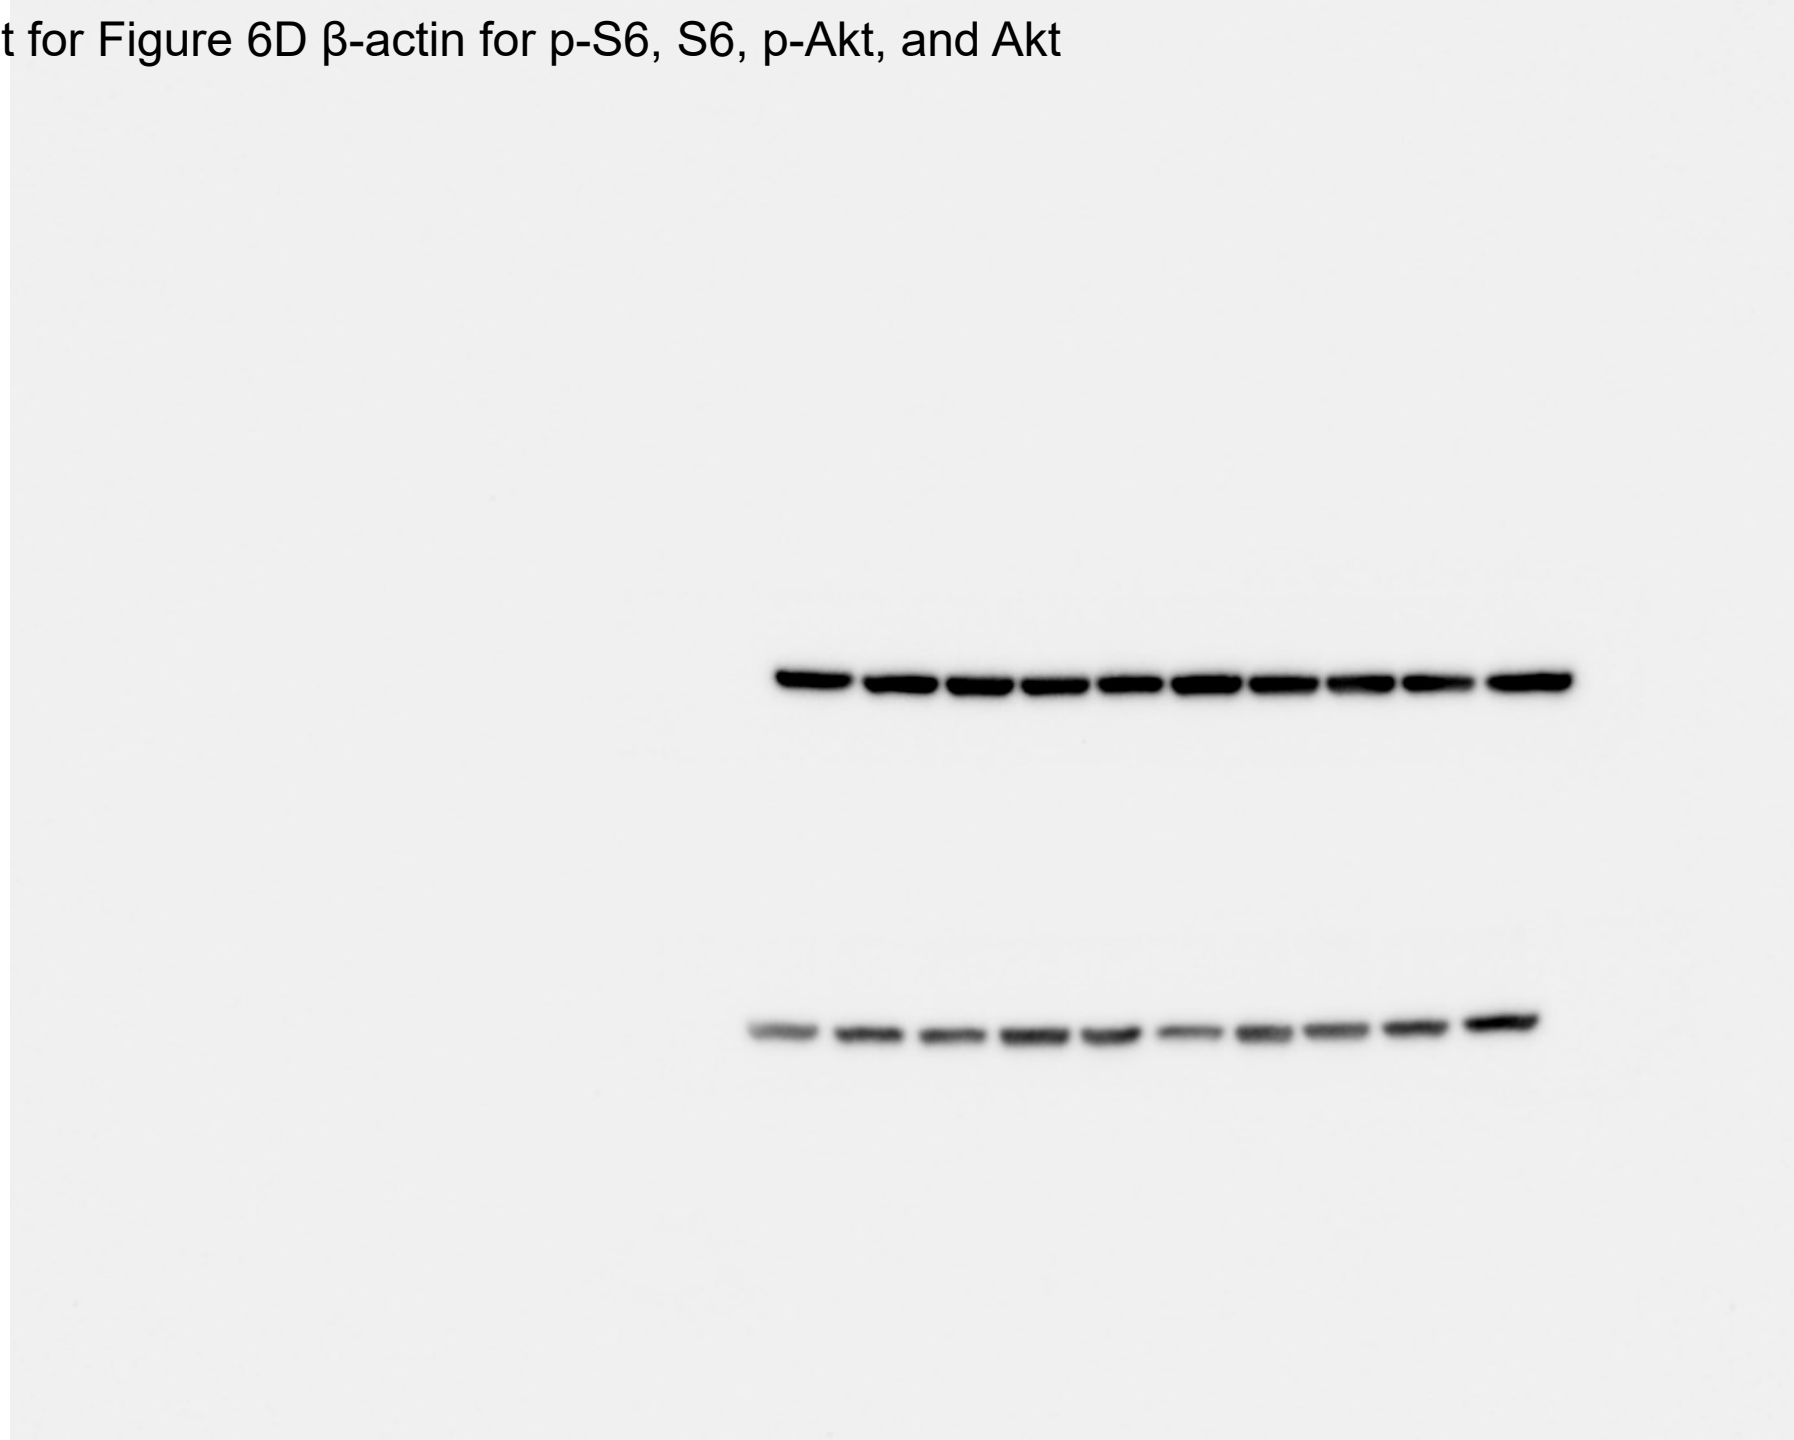

Full unedited blot for Figure 6D  $\beta$ -actin for p-S6, S6, p-Akt, and Akt

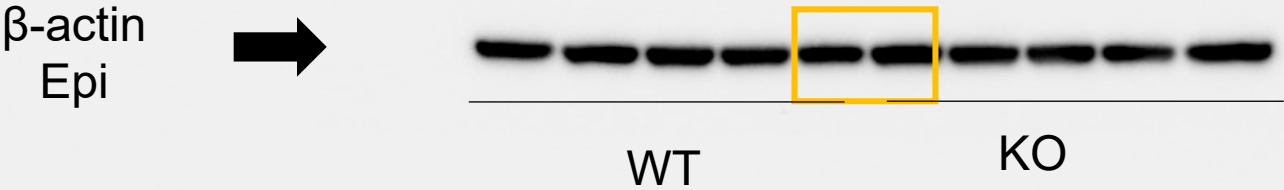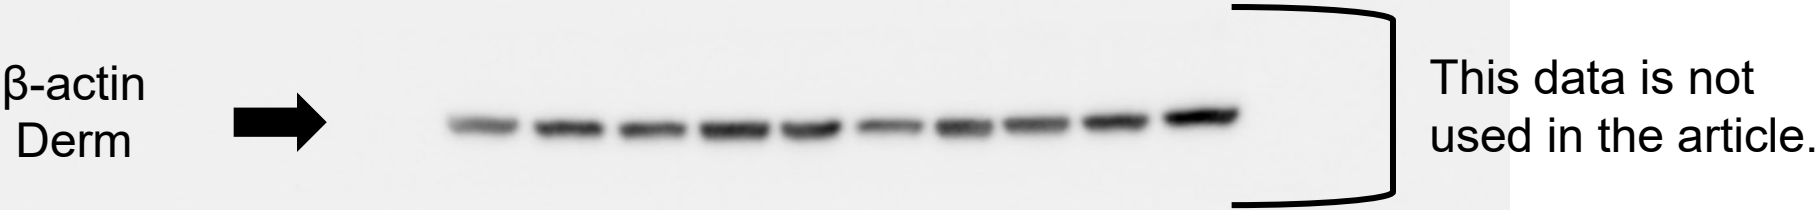

Supplement: fig6-data2 [file elife-97654-fig6-data2-v1.zip]
