# Supplementary material for: Downregulation of semaphorin 4A in keratinocytes reflects the features of non-lesional psoriasis
Source: eLife. 2024 Dec 31;13:RP97654. doi: 10.7554/eLife.97654 (PMC11687936; doi:10.7554/eLife.97654)
Supplement: Figure 1—figure supplement 1—source data 1. [file elife-97654-fig1-figsupp1-data1.xlsx]

## Sheet: Figure 1-figure supplement 1D
	Log2 Fold-change	log10 False Discovery Rate
SPRR2D	2.49	300
POF1B	-0.69	300
TMSB4X	0.83	300
B2M	0.94	300
HLA-C	0.59	300
DEFB4A	0.76	300
ADIRF	0.86	300
APOBEC3A	0.72	300
CSTB	1.1	300
S100A8	1.62	300
SPINK5	-1.09	300
MTRNR2L12	1.29	300
KRT6B	1.12	300
PI3	1.48	300
SPRR2F	0.93	300
MTRNR2L8	1.36	300
SPRR2G	1.88	300
MTRNR2L10	1.22	300
SPRR2A	2.25	300
FAM25A	1.24	300
GDA	0.35	303.071
BTG3	-0.49	287.538
KRT16	0.91	283.818
IFI27	0.93	283.264
BPIFC	-0.53	279.609
KRT17	1.07	267.055
SPRR2B	1.13	264.263
C12orf29	-0.54	264.182
MIR22HG	-0.56	247.668
TMPRSS11D	0.34	244.642
LCE3E	1.03	241.717
ELMOD1	-0.37	241.312
NFE2L2	-0.56	237.854
HILPDA	0.33	236.535
ERO1A	0.53	233.64
NDUFA4L2	0.39	227.039
KRT23	-0.92	222.365
HSPB8	-0.63	221.932
NFKBIA	-0.75	214.654
IER3	-0.73	213.199
TMSB10	0.81	212.092
ALDOA	0.41	211.775
PRKCI	-0.34	210.91
CARHSP1	0.37	207.488
SLC30A7	-0.3	203.161
QSOX1	0.48	197.223
KLHL18	-0.4	196.565
MITF	-0.24	193.308
AK6	-0.3	190.341
SERPINB7	-0.7	189.959
MIF	0.46	189.714
SPRR2E	1.1	189.293
SLC35F2	-0.27	188.81
PELI1	-0.46	187.042
H3F3B	-0.68	186.611
PRR9	0.59	185.551
LGALSL	-0.36	184.68
EPN3	-0.47	183.959
YBX3	-0.42	183.886
CD52	0.19	182.735
SLC19A2	-0.28	182.686
SPAG1	-0.3	182.066
EIF1AX	-0.55	180.441
PIEZO1	-0.37	180.305
HMGCR	-0.35	178.317
KRT6A	0.71	178.245
REL	-0.36	177.866
S100A4	0.27	177.804
S100P	0.32	177.635
ZNF706	-0.37	174.038
CDV3	-0.35	173.369
PGK1	0.4	173.256
PNRC1	-0.57	172.039
S100A12	0.33	171.636
ATP6V0B	-0.48	170.932
KIAA1468	-0.28	169.682
CSRNP1	-0.37	169.474
MAP2K3	-0.55	168.833
HNRNPL	-0.24	167.24
TPRA1	-0.34	166.442
NDFIP2	-0.33	165.316
DAAM1	-0.43	162.686
HIVEP2	-0.35	160.627
COPS2	-0.31	158.57
MTRNR2L1	0.66	157.6
AFTPH	-0.3	157.054
ESF1	-0.27	156.742
AMOTL2	-0.34	155.402
FAM241A	-0.27	154.759
45354	-0.28	154.613
KLHL21	-0.39	153.409
ERBIN	-0.37	152.879
SLAIN2	-0.42	152.664
NSRP1	-0.25	151.333
MCUR1	-0.39	150.607
UBE3A	-0.25	150.407
AQP9	-0.18	149.527
VEGFA	0.27	147.258
SDR9C7	-0.42	146.355
GAR1	-0.19	146.298
NGDN	-0.24	145.442
S100A7	1.01	145.181
CCL20	-0.59	144.951
CHIC2	-0.53	144.509
CFDP1	-0.21	144.35
ZNF91	-0.22	144.338
ACAP2	-0.25	142.701
WTAP	-0.39	142.387
CD74	0.36	141.9
RAB18	-0.33	141.565
TDG	-0.25	141.259
TPI1	0.45	140.903
KIF1B	-0.34	140.735
NR1D2	-0.34	140.419
BICD2	-0.24	139.206
RSPH1	-0.2	139.145
LCE3A	0.36	138.325
EFNA1	-0.34	137.646
LTB	0.14	134.914
ABCA12	-0.39	134.498
PSMD11	-0.31	134.434
NCKAP1	-0.29	134.08
TET3	-0.21	134.035
CENPL	-0.18	133.719
AC009501.1	0.17	133.562
HUWE1	-0.28	133.536
RABGEF1	-0.24	133.167
TRBC2	0.14	133.003
KRT6C	0.26	132.886
USP54	-0.16	132.629
MOB4	-0.21	132.503
SMARCA5	-0.21	132.487
MAGOH	-0.25	132.478
HLA-DPB1	0.24	132.415
PSG4	-0.25	132.182
CLK4	-0.19	132.02
RCHY1	-0.26	131.924
TFAP2C	-0.19	131.886
NFKB1	-0.31	131.326
CYBA	0.18	131.264
SLC3A2	-0.4	130.857
PPP1R14C	-0.19	130.676
AADACL2	-0.16	130.622
SLPI	0.84	130.261
YME1L1	-0.32	130.192
LCE3D	0.94	130.025
ACTR3	-0.35	129.955
SH3BGRL3	0.47	129.513
ZC3H12C	-0.18	129.51
MSMO1	-0.33	128.4
GATAD2A	-0.27	127.752
PSMC3	-0.27	127.462
PSMD12	-0.25	127.182
EPOP	-0.22	126.991
CDK7	-0.27	126.963
SSB	-0.19	126.943
GPI	0.21	126.684
NHSL2	0.16	126.575
SELENOK	-0.47	126.489
RBM8A	-0.43	126.37
SVIP	-0.21	126.364
NUCB2	-0.45	126.263
IP6K2	-0.32	126.246
AL078639.1	-0.09	125.839
ZC3H15	-0.31	125.839
HSPA13	-0.14	125.738
ILF2	-0.29	125.53
AKR1C1	-0.28	125.418
COQ10B	-0.31	125.095
IFFO2	-0.24	125.056
CRYAB	-0.34	125.024
LYZ	0.17	123.886
S100A2	-0.61	123.69
CEACAM1	0.19	123.636
GADD45A	-0.59	123.59
NFKBIB	-0.34	123.253
KLK10	0.51	123.07
NOC3L	-0.19	122.857
BAZ1A	-0.35	122.467
SNW1	-0.24	122.117
CDC26	-0.25	122.112
ZNF681	-0.27	122.021
SGTA	-0.29	121.57
LMO7	-0.29	120.695
GOLGA4	-0.36	119.648
ETS2	-0.3	119.318
DDX21	-0.25	119.038
MCL1	-0.37	119.037
GABPB1	-0.19	118.81
CLPTM1L	-0.2	118.742
CRB3	-0.34	118.536
GSPT1	-0.23	118.51
DHCR24	-0.16	118.393
PPP1R15B	-0.31	118.365
TNFAIP3	-0.33	118.326
ZNF165	-0.33	118.258
KMT2E	-0.3	118.024
ABCF1	-0.27	118.023
FAM135A	-0.22	117.474
RBBP6	-0.41	117.342
CD3D	0.11	117.168
CEBPZ	-0.2	117.026
GPR87	-0.19	116.917
ADK	-0.24	116.9
S100A9	0.85	116.77
CTSA	-0.29	116.306
WAC	-0.33	116.083
ARL5A	-0.16	116.076
LINC00302	0.42	115.682
RPL10	0.58	115.538
GTF2H1	-0.25	115.384
CXCL8	-0.36	115.37
MAL2	-0.29	114.796
TMEM131	-0.18	114.747
AC011473.4	-0.39	114.369
GRPEL1	-0.24	114.113
NECTIN4	-0.35	113.967
PIP4P1	-0.21	113.697
TAX1BP1	-0.37	113.688
TAF4B	-0.21	113.62
SERPINB4	0.53	112.324
GUK1	0.43	112.122
SLC36A4	-0.15	111.708
PDCD6IP	-0.28	111.426
PSMA5	-0.22	111.402
RSRP1	-0.36	111.364
TNKS2	-0.23	111.322
ZNF800	-0.19	111.222
SRGN	0.16	111.087
SMPD3	-0.39	110.654
GNAI1	-0.22	110.22
TLE4	-0.21	110.14
IL32	0.2	110.077
PTGES3	-0.29	110.038
MORN2	-0.13	109.824
EDEM1	-0.31	109.602
EIF2S1	-0.2	109.565
TMPRSS4	0.1	109.144
GEM	-0.2	108.924
KIF21A	-0.13	108.883
ERLIN1	-0.11	108.788
CHD1	-0.25	108.627
CLIP1	-0.36	108.375
SERBP1	-0.3	108.347
TBC1D12	-0.13	108.331
USP32	-0.17	108.278
NSA2	-0.23	108.214
MT-ND4L	-0.33	108.199
TAF1D	-0.36	107.126
ZNF24	-0.16	106.983
CEBPG	-0.19	106.772
ATP6V0A1	-0.23	106.719
WFDC12	0.19	106.654
ABI1	-0.25	106.492
TRAC	0.11	106.394
IRAK2	-0.19	106.123
IVNS1ABP	-0.25	105.866
PGRMC1	-0.22	105.67
TBCA	-0.31	105.668
QPCT	-0.23	105.446
HNRNPA1	-0.33	105.304
POLB	-0.12	105.189
PHLDA1	-0.36	105.108
ZNF675	-0.14	105.013
MRPS36	-0.2	104.955
CAMSAP2	-0.19	104.735
TRPM7	-0.18	104.451
C11orf54	-0.12	104.381
ADAP2	-0.25	104.178
S100A7A	0.17	104.095
ZRANB2	-0.25	103.785
PIP5K1A	-0.31	103.724
LIMK2	-0.15	103.254
KRR1	-0.21	103.245
TULP4	-0.25	103.233
NIPBL	-0.29	103.194
TARS	-0.17	103.1
RAB11A	-0.35	103.047
PRELID1	-0.34	103.007
HIST1H2AC	-0.36	102.759
PTPN11	-0.19	102.721
UCHL3	-0.36	102.388
FBXO32	-0.24	102.326
STRAP	-0.24	102.128
MRPL47	-0.27	101.959
HMGCS1	-0.4	101.879
PITPNB	-0.2	101.863
DDX39A	-0.39	101.735
TYRP1	0.13	101.55
SRSF9	-0.32	101.292
CCDC59	-0.23	101.064
PKP1	0.41	100.967
CYLD	-0.35	100.903
SNU13	-0.28	100.81
PSMD1	-0.19	100.762
NAF1	-0.18	100.752
BCL10	-0.2	100.606
PIM3	-0.23	100.336
DNAJA2	-0.27	100.219
LMTK3	0.15	100.202
ERGIC2	-0.18	100.135
PDZD2	-0.16	100.119
BTBD10	-0.18	100.081
RPS16	0.47	99.983
NAA20	-0.19	99.8182
EVI5	-0.14	99.7375
IL36G	0.43	99.7305
LAPTM5	0.09	99.2132
STX3	-0.3	99.1952
ARHGAP23	-0.16	99.1518
GRHL1	-0.34	98.8665
DNTTIP2	-0.16	98.7033
LARP4B	-0.21	98.5735
EAF1	-0.22	98.4815
INO80C	-0.15	98.251
GLRX3	-0.28	98.2055
BBOX1	-0.13	98.1898
KLK5	-0.49	98.1427
GNG12	-0.2	98.1308
ARPC5L	-0.32	97.6696
HSPB1	-0.52	97.6055
MFAP1	-0.21	97.5361
NFAT5	-0.28	97.3072
CTSB	0.28	97.2967
YY1	-0.27	97.0701
MAP2K4	-0.16	96.8894
DDA1	-0.22	96.6596
STEAP1B	0.22	96.6308
PPIG	-0.26	96.5918
RTN3	-0.21	96.5072
CDK19	-0.16	96.4179
PSMB7	-0.29	96.3206
MED31	-0.23	96.2534
SUPT5H	-0.19	96.0778
LTN1	-0.15	96.0128
ENSA	-0.23	96
KLF10	-0.33	95.7077
SEC61B	-0.38	95.6576
CUL1	-0.16	95.5186
MAP2	-0.19	95.3665
NRIP1	-0.25	95.3107
AZGP1	-0.29	95.0788
IFI27L2	0.16	94.9318
CST3	0.18	94.7496
PNP	-0.29	94.5952
GAPDH	0.41	94.5171
RHEB	-0.37	94.3665
TUBA1C	-0.35	94.3635
KHDC4	-0.3	94.1068
FCHSD1	0.5	94.0575
SERPINA12	-0.13	93.8182
NDUFA6	-0.3	93.719
TSC22D1	-0.24	93.5867
FAM3C	-0.15	93.5421
ARL13B	-0.18	93.4949
TMEM126A	-0.17	93.3125
WBP11	-0.16	93.2351
ELL	-0.22	93.1811
VIM	0.19	93.1403
CHMP4B	-0.28	92.8697
RPL18A	0.5	92.7282
SEM1	-0.4	92.6576
ARIH1	-0.25	92.5969
DOPEY1	-0.11	92.5171
GPBP1	-0.28	92.4685
PNPLA8	-0.22	92.3325
RNF11	-0.33	92.2248
FRG1	-0.22	92.1911
KANK1	-0.19	91.9706
KPNA4	-0.23	91.8729
BTF3L4	-0.2	91.8069
KPNA3	-0.13	91.8041
LRIF1	-0.32	91.6126
DNAJB11	-0.16	91.5719
POMP	-0.3	91.5058
ATP6V1C1	-0.26	91.4841
SUCO	-0.19	91.4724
APPBP2	-0.18	91.3904
PGRMC2	-0.17	91.301
MRPS18C	-0.22	91.2161
KANSL1L	-0.14	91.0867
MARCKSL1	0.29	90.8962
UBL3	-0.41	90.7144
NFKBIE	-0.16	90.6861
HOPX	-0.63	90.6716
ASNA1	-0.24	90.6576
MLANA	0.11	90.6234
CANX	-0.23	90.6216
EXPH5	-0.15	90.3778
CCDC120	-0.12	90.3595
STYXL1	-0.14	90.0958
BSPRY	-0.1	89.7905
ARL8B	-0.36	89.6946
ING3	-0.13	89.6253
HSPA9	-0.29	89.5884
NOTCH2	-0.17	89.5528
PSMB2	-0.21	89.1959
C2orf42	-0.1	89.1785
FBXO46	-0.13	89.025
HLA-DRA	0.25	89.0159
PPP1R13L	-0.2	88.8601
APPL2	-0.17	88.7773
PRDX1	-0.3	88.6904
EIF4A3	-0.34	88.4271
TLK1	-0.16	88.1549
CAV1	-0.17	88.0381
PUM1	-0.27	88.0357
SNRPA1	-0.15	87.9872
MITD1	-0.13	87.9706
VBP1	-0.19	87.9245
NLN	-0.11	87.9066
IL6ST	-0.28	87.8508
PPDPF	0.37	87.8508
DDX52	-0.16	87.8182
UNC50	-0.12	87.7825
COPZ1	-0.2	87.6055
SRP19	-0.23	87.5346
STEAP4	-0.24	87.4365
PIGN	-0.19	87.3215
SLTM	-0.25	87.2907
LGALS1	0.23	87.2373
IZUMO4	0.09	87.0747
TIPARP	-0.27	86.9245
WNK1	-0.19	86.8665
PPP4R2	-0.19	86.7375
ARHGEF10L	-0.17	86.6716
BPTF	-0.22	86.5952
SMAGP	-0.24	86.4989
KDM5B	-0.23	86.4609
USP12	-0.16	86.4248
CEBPD	-0.23	86.4112
PXDC1	-0.13	86.3325
UQCR10	-0.28	86.3251
UTP11	-0.17	86.1391
HNRNPH1	-0.31	86.1215
ATP6V1C2	-0.32	86.0809
SERPINB3	0.53	86.056
RSAD1	-0.11	86.0372
APOBEC3B	0.14	85.9393
VPS29	-0.2	85.8601
XDH	-0.13	85.7375
CTSL	0.28	85.7258
GTF2F2	-0.22	85.6536
TUFT1	-0.28	85.4802
ARL2	-0.16	85.3449
USP7	-0.16	85.3372
AC007728.2	-0.14	85.1752
HNRNPH2	-0.24	85.1391
WHAMM	-0.2	85.1361
MEF2D	-0.16	85.1096
EIF1AY	-0.12	85.0141
TMEM79	-0.21	84.9626
UBE2G1	-0.25	84.9136
MFSD14B	-0.16	84.8268
RAE1	-0.15	84.8239
SNX9	-0.31	84.7932
PSMD7	-0.2	84.5086
ZNF140	-0.09	84.2175
ZFAND5	-0.36	84.1911
WDR83OS	-0.25	84.1884
PPP4R3A	-0.22	84.0685
GNAI3	-0.27	84.0334
AC006449.6	-0.12	83.9666
PPID	-0.12	83.7282
HNRNPF	-0.23	83.4949
PDXDC1	-0.13	83.426
SIPA1L3	-0.1	83.2233
STAM	-0.21	83.0555
TAF11	-0.14	83.0424
NOP16	-0.15	82.9957
SEC24A	-0.24	82.9031
VNN1	0.13	82.7545
ATP5F1B	-0.26	82.7282
MFSD12	0.33	82.6925
NUP58	-0.23	82.5498
TRIM25	-0.18	82.4935
KIF5B	-0.25	82.4056
CD68	0.18	82.209
SMNDC1	-0.22	82.2034
TMEM217	-0.13	82.1864
PSMC2	-0.13	82.1221
SECISBP2L	-0.17	82.0888
EIF4G1	-0.25	82.0878
CD2	0.08	81.9281
CXCR4	0.11	81.9066
ZSWIM6	-0.15	81.8539
PAFAH1B1	-0.26	81.8327
HSBP1L1	-0.3	81.7799
CHMP2B	-0.35	81.6778
GOLPH3	-0.2	81.5498
RTF1	-0.19	81.5031
SSR3	-0.22	81.4056
C16orf72	-0.28	81.3188
FAM133B	-0.18	81.2874
UBXN2A	-0.15	81.2418
LY6G6C	-0.21	81.219
RBM7	-0.21	81.1772
NAA15	-0.18	81.1355
DYNC1LI1	-0.19	81.0883
SOD2	-0.29	80.9208
ZC3H12A	-0.23	80.8477
PTPN3	-0.09	80.7825
WWC1	-0.19	80.7721
SMTN	-0.27	80.7167
ARGLU1	-0.25	80.7077
ANKRD12	-0.25	80.618
TMPRSS11F	-0.22	80.5901
CRY1	-0.22	80.4023
LIMD2	0.07	80.3686
SEC62	-0.25	80.3605
DHRS9	-0.4	80.2676
DNAJC8	-0.3	80.2034
NBDY	-0.14	80.1331
SLC38A2	-0.28	80.0625
RAB21	-0.29	79.9431
RB1CC1	-0.33	79.6676
LSM14A	-0.22	79.6038
U2SURP	-0.17	79.451
PRCC	-0.12	79.3497
ELF1	-0.23	79.2765
CHM	-0.13	79.2541
GNL1	-0.16	79.1379
USP16	-0.16	79.0106
NPM1	-0.39	78.9172
DEGS2	0.12	78.9136
EBNA1BP2	-0.14	78.9101
RELB	-0.17	78.684
TBK1	-0.12	78.5935
MFSD2A	-0.13	78.4584
GRAMD1C	-0.2	78.4078
SSBP1	-0.18	78.4067
LAMTOR5	-0.26	78.2628
SGMS1	-0.1	78.2083
PSMA2	-0.2	78.1343
SKIL	-0.27	78.1319
ZBTB21	-0.11	78.0195
ELF3	-0.28	77.9469
ZNF26	-0.1	77.8697
ATXN2L	-0.14	77.8633
PNO1	-0.11	77.857
DEFB103A	0.12	77.8539
RPL28	0.44	77.8327
SLC39A14	-0.11	77.7258
KDM6B	-0.16	77.6716
MED19	-0.16	77.4802
SLC6A8	0.18	77.4377
GOLGB1	-0.23	77.3215
PSMD6	-0.14	77.2984
FDX1	-0.14	77.2418
CNBP	-0.26	77.2182
E2F6	-0.09	77.1379
PSMB1	-0.23	77.1152
BNIP3	0.33	77.0742
IL7R	0.1	77.059
CNOT1	-0.18	76.9747
C11orf96	-0.17	76.8928
TBC1D10B	-0.12	76.8761
ARID4B	-0.22	76.6904
HPGD	-0.23	76.5935
FSCN1	0.22	76.5834
AFF4	-0.27	76.5768
NACA	-0.41	76.4437
NAA50	-0.19	76.2083
ARHGAP12	-0.14	76.1844
RAF1	-0.2	76.1457
PRMT1	-0.13	76.0191
PPP2R5E	-0.13	75.9393
ZFP36	-0.44	75.8996
UTRN	-0.09	75.8182
TGFB1	0.12	75.5607
FOPNL	-0.12	75.5607
YY1AP1	-0.26	75.3625
TRAPPC6B	-0.13	75.3098
NCOA4	-0.19	75.1367
MED6	-0.22	75.0531
ASAP1	-0.16	75.0164
NR1D1	-0.39	74.8996
SORD	-0.12	74.8761
SENP6	-0.18	74.8386
RBM17	-0.15	74.7595
DEFB103B	0.13	74.7282
GNL3	-0.13	74.7282
MAP7	-0.13	74.6946
TOMM34	-0.17	74.5686
SRSF11	-0.26	74.5258
S100A6	0.3	74.4868
PUM2	-0.19	74.4437
ADNP	-0.18	74.2832
SAP30BP	-0.21	74.2464
RPL22L1	-0.28	74.2449
TNF	-0.17	74.1986
RSRC1	-0.1	74.1669
EIF5B	-0.25	74.1391
TRMT6	-0.1	74.0521
RAB30-AS1	-0.12	73.9172
PSMD2	-0.26	73.7799
HIST2H2AA4	-0.11	73.71
SLIRP	-0.19	73.6216
CXADR	-0.15	73.451
NOP58	-0.22	73.4023
PRPF38B	-0.25	73.3747
JMJD1C	-0.32	73.327
STK19	-0.13	73.2403
ATP1B3	-0.24	73.2248
AGPAT4	0.07	73.1331
SLC11A2	-0.12	73.0752
FRMD4B	-0.22	73.041
TNIP1	-0.19	73.0004
RSPRY1	-0.13	72.8962
CALML5	-0.53	72.8633
TMEM45A	-0.27	72.8633
BRD4	-0.21	72.8153
NUCB1	0.13	72.8153
EREG	-0.22	72.7932
PRKCD	-0.12	72.7825
TRBC1	0.08	72.7033
KRT80	-0.46	72.6799
VEZT	-0.15	72.5702
THAP1	-0.14	72.5607
DLX5	-0.13	72.556
WAPL	-0.16	72.2097
RUSC2	-0.14	72.1568
VMO1	0.09	72.1421
MMADHC	-0.25	72.0453
RBM42	-0.2	71.9626
IFITM2	0.08	71.8827
ERCC1	0.25	71.8153
SMU1	-0.1	71.8013
ZNF264	-0.1	71.644
DUSP11	-0.13	71.4989
GPSM3	0.07	71.4828
BCAP31	0.18	71.4353
PRMT5	-0.13	71.4056
C1orf52	-0.19	71.3595
ZNF644	-0.12	71.2774
ADRM1	-0.19	71.2034
NUP50	-0.2	71.1838
PLK3	-0.14	71.1221
DCTN6	-0.18	70.8794
ATP2B1	-0.14	70.7852
RAN	-0.31	70.7696
TBC1D10A	-0.13	70.7282
MYO5B	-0.19	70.6459
TFIP11	-0.12	70.4962
BCLAF1	-0.21	70.451
AHI1	-0.15	70.4078
MPRIP	0.19	70.3429
YWHAZ	-0.31	70.3382
SESN2	-0.23	70.2321
COPS3	-0.14	70.2076
UTP6	-0.13	70.1343
TMCO1	-0.17	70.1062
SEH1L	-0.1	70.1029
HNRNPH3	-0.37	70.0362
CWC27	-0.1	69.9508
ATF6	-0.11	69.9245
MDM4	-0.16	69.9136
CEBPB	-0.33	69.9101
LUC7L	-0.12	69.7721
GCLM	-0.11	69.7545
EIF6	-0.33	69.7471
SPTSSB	-0.11	69.7282
CCL22	0.14	69.7011
AF117829.1	-0.08	69.6615
AP1AR	-0.08	69.644
H2AFY	-0.22	69.6364
FER	-0.13	69.6253
RANBP9	-0.23	69.6021
TMED9	-0.17	69.5884
ELK1	-0.1	69.466
KHDRBS1	-0.19	69.4584
ALOX5AP	0.07	69.3726
ZNF638	-0.13	69.3391
DIP2B	-0.14	69.3072
DHX32	-0.16	69.2782
CGNL1	-0.08	69.266
TMEM106C	-0.14	69.2549
STARD5	-0.1	69.2526
ELOVL7	-0.24	69.2226
TNKS	-0.12	69.1701
VAPA	-0.34	69.1261
WFDC5	0.24	69.0804
SNRPB	-0.3	69.0487
ETV4	-0.07	69.0223
UBE2K	-0.2	68.9747
DOCK9	-0.16	68.8665
MAP4K5	-0.1	68.8041
THOC1	-0.09	68.8013
SYF2	-0.24	68.767
UBE2J1	-0.14	68.7033
INTS2	-0.18	68.5591
RPL29	0.39	68.4271
SNX12	-0.08	68.3665
HLA-E	0.33	68.317
AC023157.3	0.27	68.2976
CREBBP	-0.19	68.2907
NUP153	-0.15	68.2848
NR4A1	-0.16	68.1911
YBX1	-0.33	68.1785
MYDGF	-0.21	68.1284
SMCR8	-0.16	68.1209
DAP3	-0.14	68.0472
CORO1A	0.08	67.9788
AKIRIN1	-0.23	67.9136
MRPL49	-0.1	67.9101
DCUN1D3	-0.14	67.8508
CDS1	-0.14	67.7959
RPL37	0.44	67.7773
NIPAL4	-0.1	67.757
EID2	-0.11	67.752
GOLGA7	-0.25	67.6364
CNOT4	-0.13	67.5918
RPL26L1	-0.14	67.567
GTF2A2	-0.23	67.4949
UBE2B	-0.4	67.4895
PSMA1	-0.16	67.4828
MALT1	-0.15	67.4437
INAVA	-0.17	67.4425
SLC35F5	-0.18	67.2848
SMIM13	-0.12	67.2692
RBM23	-0.12	67.1959
CMC2	-0.17	67.1073
N4BP2L2	-0.19	67.1024
EPAS1	-0.16	67.056
SMIM5	-0.11	67.0353
CKMT2-AS1	-0.08	66.9788
TOX4	-0.25	66.9208
FNIP2	-0.11	66.9031
PCNP	-0.19	66.8861
PDPK1	-0.12	66.8729
HLA-DPA1	0.15	66.8125
ZDHHC9	-0.08	66.7423
FTL	0.58	66.7077
UBE2M	-0.15	66.7055
KIAA1551	0.31	66.6144
FLG	-0.25	66.6108
PRRG2	-0.1	66.6003
NDUFC1	-0.19	66.5544
HNRNPDL	-0.35	66.5452
DUSP8	-0.2	66.3645
NFKB2	-0.17	66.3575
NEDD4L	-0.3	66.3072
TYROBP	0.13	66.2984
MCM7	-0.21	66.2984
BCCIP	-0.14	66.2941
NUP54	-0.12	66.279
FGD5-AS1	-0.18	66.2055
STX19	-0.11	66.2034
SEC31A	-0.15	66.0762
FLCN	-0.23	66.0419
ID2	0.39	65.9872
AHSA1	-0.13	65.9788
PER1	-0.28	65.9706
UBQLN2	-0.15	65.9586
BLMH	-0.13	65.9586
CIART	-0.18	65.9393
FBXO8	-0.1	65.9281
CCL5	0.1	65.9031
RAB22A	-0.19	65.8153
TXNRD1	-0.21	65.8013
AC083843.3	-0.09	65.7645
BTG2	-0.16	65.7447
RNF185	-0.21	65.7423
CCDC186	-0.29	65.6716
SPTY2D1	-0.22	65.5751
TMEM60	-0.12	65.5436
DSTN	-0.36	65.5258
ARHGDIB	0.09	65.4461
DEK	-0.23	65.383
IKZF1	0.06	65.2823
CALR	-0.23	65.279
BCL7B	-0.12	65.2411
RPF2	-0.12	65.1451
SPRR1B	0.58	65.1325
CRKL	-0.19	65.1113
EHD1	-0.2	65.1046
GMFG	0.07	65.0899
CLTC	-0.2	65.083
MFAP3L	-0.07	65.0721
PPP4R3B	-0.19	65.065
MTRNR2L3	0.08	65.0132
ATP5MD	-0.28	65.0114
RBM5	-0.2	64.9957
TTC39B	-0.16	64.9706
BRIX1	-0.12	64.8697
UBQLN1	-0.16	64.8665
COA6	-0.13	64.8447
NXT2	-0.11	64.8416
YARS	-0.11	64.8356
JUNB	-0.4	64.7747
FOXJ3	-0.15	64.7352
LDHA	0.32	64.719
TARDBP	-0.22	64.6882
NCL	-0.24	64.6055
CLDND1	-0.23	64.6003
NAPA	-0.24	64.5969
ITPR1	-0.08	64.5376
ZBTB37	-0.07	64.5302
ADGRL2	-0.22	64.4389
EDEM3	-0.07	64.4123
VMP1	0.26	64.4045
TMEM38B	-0.13	64.4012
CTSV	-0.32	64.3757
TMEM205	-0.13	64.3143
CD3E	0.06	64.2426
RRAGC	-0.23	64.2027
BDP1	-0.12	64.1752
ABTB2	-0.12	63.9788
PTPN21	-0.08	63.9281
HNRNPA3	-0.3	63.8297
HIF1A-AS2	0.1	63.7878
SLC25A13	-0.08	63.762
ADGRG1	-0.13	63.7352
HNRNPA2B1	-0.31	63.7305
ZNF567	-0.07	63.7235
PARD6B	-0.22	63.6459
LAMTOR3	-0.24	63.6308
RRM1	-0.11	63.6073
GAS7	-0.09	63.5918
TBC1D22B	-0.14	63.4461
TRIP11	-0.16	63.433
C4orf3	0.34	63.4318
CDC42EP5	0.08	63.3546
ADNP2	-0.25	63.3458
BRD1	-0.12	63.3098
RAB14	-0.19	63.2358
TM4SF19	0.07	63.1481
ZC3H4	-0.14	63.06
EIF2S2	-0.2	63.057
FYTTD1	-0.19	63.0237
ARAP2	-0.27	63.0013
EIF3A	-0.29	62.983
PRPF4B	-0.21	62.9318
AKR1C2	-0.14	62.9208
ZNF655	-0.15	62.9208
C1orf116	-0.2	62.9066
CRTC2	-0.1	62.8794
EGFR	-0.09	62.6819
MSANTD3	-0.14	62.6517
EIF4G2	-0.32	62.6253
APRT	0.15	62.6234
MUL1	-0.14	62.6144
IARS	-0.11	62.5702
DR1	-0.18	62.5686
AC103957.2	-0.07	62.5622
EIF3I	-0.23	62.5186
ENDOU	-0.11	62.4498
TMEM176A	0.07	62.4179
MYO1B	-0.15	62.3686
EIF5	-0.38	62.289
ZNF317	-0.1	62.2733
PAWR	-0.12	62.1746
RPL31	0.36	62.1319
NDRG1	0.22	62.0846
LATS2	-0.16	62.0825
CEACAM6	0.11	62.0595
NUMB	-0.18	62.0511
MAST4	-0.16	61.9872
TAF13	-0.23	61.9626
RABGAP1	-0.13	61.9547
ATP6V1G1	-0.3	61.9508
CMTM6	-0.19	61.9393
SRF	-0.1	61.8894
RANGAP1	-0.13	61.8794
SEC61A1	-0.15	61.8356
ST13	-0.24	61.7825
DHRS11	-0.08	61.644
PTPRC	0.06	61.6402
PER2	-0.1	61.6383
TOR1AIP2	-0.31	61.6144
TSPYL1	-0.2	61.5969
LIPM	-0.17	61.5702
EVL	0.06	61.433
LDHB	0.08	61.3134
SPART	-0.12	61.2967
PRSS3	-0.33	61.2882
KRT15	-0.14	61.2815
SERPINB1	0.12	61.2526
ABCA5	-0.12	61.2495
ATMIN	-0.12	61.2449
ACACA	-0.08	61.1662
MED30	-0.13	61.0511
SEL1L	-0.13	60.9872
FBXW11	-0.15	60.9355
FAM214B	-0.09	60.9172
MFN1	-0.14	60.7852
PDCD10	-0.17	60.7077
NRBP1	-0.14	60.7055
ZFP91	-0.1	60.699
LIN7C	-0.12	60.6904
PSPC1	-0.18	60.6676
SERPINB9	0.11	60.6676
NEU1	-0.18	60.5884
ASPRV1	0.32	60.5406
MTF1	-0.1	60.3401
FMNL1	0.05	60.327
MASTL	-0.08	60.2692
STIP1	-0.18	60.2636
KDELR2	-0.16	60.0526
PPTC7	-0.09	60.0123
MRPS15	-0.14	60.0017
MRPL50	-0.11	59.983
GNA15	-0.17	59.9788
PURB	-0.1	59.9431
ZNF433	-0.07	59.9431
TOMM7	0.21	59.9172
PROM2	-0.11	59.8861
COG3	-0.12	59.8697
KLK7	-0.29	59.7595
RPS6KA3	-0.17	59.7305
NAMPT	-0.28	59.7033
TMF1	-0.15	59.6576
MORC4	-0.07	59.6556
NBR1	-0.13	59.5017
VNN3	0.17	59.4622
ILF3	-0.17	59.4001
PLA2G4D	0.18	59.4001
EIF3B	-0.1	59.3925
LYPD5	-0.23	59.342
PAPOLA	-0.26	59
ARID5B	-0.41	58.9666
AREG	-0.36	58.9393
RANBP2	-0.11	58.9136
TRAPPC8	-0.15	58.8894
DNAJC7	-0.16	58.8539
FILIP1L	-0.11	58.8125
CR381653.1	0.05	58.8097
RPS4Y1	-0.15	58.767
GGNBP2	-0.12	58.6517
NBPF19	-0.17	58.585
USP6	-0.06	58.5287
GYPC	0.06	58.4868
DDX24	-0.15	58.4685
SP1	-0.12	58.4485
BAG1	-0.25	58.4045
YIPF5	-0.1	58.3778
OSBP	-0.11	58.3391
SMAP1	-0.15	58.2907
RAP1A	-0.15	58.2284
MAEA	-0.15	58.2248
FOXJ2	-0.07	58.2034
PSMD4	-0.13	58.1403
TMCC1	-0.13	58.0711
SPIN1	-0.09	58.06
CYTH1	-0.18	58.0386
RNF39	-0.32	57.9872
HMGN1	-0.25	57.9872
HNRNPR	-0.12	57.9508
DHX36	-0.15	57.9281
TRIM16	-0.15	57.7986
AC067930.1	0.1	57.7773
EIF4A1	-0.21	57.7447
RPL3	0.36	57.7258
ME1	-0.17	57.5751
NPTN	-0.22	57.5287
PACSIN2	-0.08	57.5157
ARHGEF10	-0.07	57.4855
VAMP2	-0.21	57.4828
SELENOS	-0.17	57.4584
PSMD14	-0.16	57.4306
GNL2	-0.12	57.4112
HSPE1	-0.21	57.3915
CKAP4	-0.09	57.3893
DDIT3	-0.24	57.3645
AC243829.5	0.04	57.2526
YRDC	-0.11	57.2403
LSP1	0.11	57.2175
REEP4	-0.11	57.2132
LCMT1	-0.13	57.1694
MRPS6	-0.2	57.1337
CD83	-0.21	57.1035
KIF9	-0.12	57.0665
RPL13	0.4	57.0496
YWHAE	-0.33	57.0164
HSPA5	-0.24	57.0132
ZNF143	-0.09	57.0057
PGF	0.1	56.9747
INO80D	-0.09	56.8861
FAM208A	-0.09	56.8447
ANAPC13	-0.09	56.821
SF3B3	-0.1	56.8153
MT1G	-0.2	56.7799
RSL24D1	-0.16	56.7799
PPM1D	-0.18	56.767
MRPL51	-0.15	56.6716
IKZF5	-0.14	56.466
MLF1	-0.08	56.4597
CFAP20	-0.18	56.2899
FGFR1OP2	-0.14	56.2373
PTPN14	-0.11	56.1952
GNLY	0.06	56.1945
SS18	-0.1	56.1759
RPL36	0.39	56.1421
ANGPTL4	0.21	56.1013
PNRC2	-0.31	56.0137
CD37	0.06	55.9788
AC108134.2	-0.09	55.9469
AC004687.1	0.04	55.8928
CREBRF	-0.27	55.8928
MBIP	-0.1	55.8729
FNIP1	-0.24	55.8153
PABPN1	-0.19	55.7423
AC020916.1	-0.1	55.7033
SELENOI	-0.08	55.6925
DHX15	-0.17	55.684
TAOK1	-0.18	55.6716
RNASEK	-0.11	55.6576
BACH1	-0.18	55.5884
LCE1C	-0.33	55.5302
HECTD1	-0.31	55.4776
CCT5	-0.1	55.4634
GIMAP7	0.06	55.4584
TLE3	-0.09	55.4401
EZH2	-0.15	55.2798
STK26	-0.1	55.2668
KHSRP	-0.11	55.214
KIF25-AS1	-0.1	55.1586
RLF	-0.26	55.1226
ANKRD11	-0.15	55.1062
ABCF2-1	-0.07	55.0964
CMIP	-0.2	55.0655
TRIR	-0.26	55.0283
SGPL1	-0.09	55.0039
AHR	-0.12	54.983
SEC23B	-0.11	54.9508
C5orf51	-0.08	54.9031
EXOC6B	-0.09	54.7471
PSMA3	-0.14	54.5638
FCHO2	-0.23	54.5376
POLR2K	-0.21	54.5258
LRRC8B	-0.08	54.451
KLF5	-0.25	54.4461
SLC22A23	-0.12	54.4401
PGAM1	0.22	54.399
USP8	-0.12	54.3757
LIN54	-0.11	54.3401
C14orf119	-0.13	54.2882
DUSP16	-0.13	54.2865
ATG101	-0.21	54.2612
YPEL2	-0.12	54.1469
SRRM1	-0.17	54.1124
RASAL2	-0.16	54.1096
NIFK	-0.13	54.0942
DUSP10	-0.13	54.0066
QTRT2	-0.07	53.9872
RIF1	-0.12	53.983
FMO2	-0.09	53.9355
DAXX	-0.09	53.9281
SPTLC3	-0.06	53.9281
PGM3	-0.09	53.9245
HELQ	-0.09	53.9066
WIPF1	0.05	53.8041
MGME1	-0.11	53.7878
DYNC1I2	-0.12	53.7696
ZBTB11	-0.12	53.7011
EIF4B	-0.17	53.6861
LAMP2	-0.17	53.6799
PREPL	-0.1	53.6308
CYB5D1	-0.07	53.567
ZMYM5	-0.13	53.5498
RBX1	-0.24	53.4921
AES	0.11	53.4802
TRMT10C	-0.11	53.4776
NSFL1C	-0.11	53.475
DEPDC1B	-0.07	53.4609
CHUK	-0.09	53.4318
IK	-0.11	53.3883
PLAGL1	-0.09	53.382
DENND2D	-0.08	53.3809
PHKG2	-0.14	53.3645
PCF11	-0.25	53.3468
HCFC2	-0.09	53.279
CCNC	-0.19	53.2628
EIF5A	-0.24	53.172
RIOK1	-0.08	53.1186
SETX	-0.19	53.1129
SETD5	-0.13	53.1013
U2AF2	-0.11	53.0535
FBLIM1	0.13	53.0467
CHTOP	-0.19	52.983
GNG5	-0.26	52.9508
STAG1	-0.11	52.8962
SPNS1	-0.17	52.8297
UBA2	-0.19	52.7878
AHCYL1	-0.19	52.7773
GSK3B	-0.11	52.7696
QRICH1	-0.11	52.6757
FBRS	-0.19	52.6655
UPF3B	-0.12	52.6459
KANSL2	-0.11	52.618
DYRK1A	-0.13	52.618
SNX2	-0.14	52.6144
TRIM29	-0.14	52.6091
HDAC2	-0.11	52.5751
SLC4A1AP	-0.07	52.3716
TMX2	-0.1	52.3344
SPPL3	-0.16	52.2874
RPL10A	0.31	52.2823
ZNF649	-0.06	52.2798
NOL9	-0.07	52.2541
NOL11	-0.09	52.2373
HIST1H3E	-0.07	52.1993
TMEM167A	-0.16	52.1688
KIAA0355	-0.11	52.1451
STX11	-0.15	52.1314
XBP1	-0.14	52.1018
SET	-0.24	52.0872
MTMR6	-0.07	52.0146
ATP6V1H	-0.15	52
LMNA	-0.23	51.9914
UFL1	-0.08	51.9747
YAP1	-0.17	51.9469
SUPV3L1	-0.13	51.9431
UTY	-0.1	51.9318
VPS35	-0.1	51.9208
GLO1	-0.26	51.9172
SQLE	-0.11	51.9066
TNFRSF14	0.05	51.8633
VAMP4	-0.08	51.857
MKNK2	0.17	51.8097
MED13	-0.22	51.8013
REV1	-0.09	51.6861
RAC2	0.05	51.5751
TNFAIP2	-0.16	51.5513
RNF181	-0.19	51.5346
KDM6A	-0.17	51.4461
ZDHHC13	-0.13	51.4283
UBE4B	-0.16	51.4078
FUT2	0.05	51.4023
RALGAPA1	-0.1	51.3206
BOD1	-0.1	51.2865
MAP4K3	-0.07	51.2612
WDFY3	-0.1	51.2596
RORA	-0.21	51.2487
DAGLB	-0.1	51.2255
DLX2	-0.15	51.2111
RNF6	-0.08	51.2111
ZNF316	-0.07	51.1965
RPS27	0.39	51.1772
FAM110C	0.13	51.1694
TIMM17A	-0.12	51.1512
SEC23IP	-0.1	51.1035
BROX	-0.16	51.0691
CWC22	-0.17	51.06
HK2	0.15	51.0205
SENP1	-0.07	51.0061
MVK	-0.07	50.9872
STT3B	-0.1	50.9666
PHLDB2	-0.11	50.9547
TENT5B	-0.23	50.9355
TOMM5	-0.12	50.9245
PPP1R12A	-0.12	50.8996
TAF7	-0.23	50.8327
CDKN1C	0.11	50.7852
NRDC	-0.13	50.7352
DSC2	0.33	50.6925
CSTA	-0.5	50.6655
MYO1F	0.04	50.6421
ZDHHC5	-0.12	50.6402
CBLL1	-0.07	50.5243
ASH1L	-0.18	50.4949
SERTAD2	-0.18	50.4921
TBC1D23	-0.15	50.4698
TRIM16L	-0.07	50.4698
ZCCHC9	-0.14	50.4647
THAP2	-0.1	50.3737
TPT1	0.44	50.2604
RPL13A	0.37	50.2573
KTN1	-0.19	50.1085
CHTF8	-0.13	50.0846
SPOP	-0.08	50.063
MALAT1	0.48	50.0453
NDUFA4	-0.23	50.0348
RNF24	-0.11	50.0057
ZRANB1	-0.23	49.9914
MTHFD2L	-0.09	49.9469
DHX9	-0.08	49.8729
TAF9	-0.12	49.8539
PSMB6	-0.18	49.8508
PCGF5	-0.1	49.8386
TRAPPC3	-0.15	49.8268
SSR4	0.18	49.821
RAB35	-0.09	49.7959
BICDL2	0.11	49.7852
RIOK3	-0.27	49.7773
ARHGAP17	-0.11	49.6778
PPP1R15A	-0.38	49.6635
LRRC42	-0.09	49.6556
RAB10	-0.26	49.6536
UBA52	0.31	49.6498
EIF3F	-0.26	49.6144
ATP6V0D1	-0.26	49.6108
LRPPRC	-0.1	49.5317
TSC22D3	0.05	49.5031
DNAJC25	-0.08	49.4815
CST7	0.1	49.466
DCP1A	-0.12	49.451
IL6R	-0.16	49.4365
OSBPL1A	-0.18	49.4306
HOOK1	-0.2	49.4295
SOWAHC	-0.17	49.3665
ATF1	-0.11	49.3224
SRFBP1	-0.07	49.3206
SUPT16H	-0.11	49.2541
ZBTB38	-0.1	49.2418
ABHD17B	-0.14	49.2418
TCEAL4	-0.11	49.1701
TET2	-0.1	49.118
CCT6A	-0.11	49.0731
FASTKD2	-0.09	49.0343
UTP3	-0.09	48.9914
PSMC1	-0.18	48.9586
UHRF1BP1L	-0.16	48.9431
TRIP10	-0.13	48.9431
SNHG19	0.08	48.9208
UBALD2	-0.21	48.8356
USP38	-0.21	48.821
PICALM	-0.18	48.8182
CENPT	-0.13	48.7932
UTP18	-0.07	48.7825
ADGRF4	-0.08	48.752
EIF3J	-0.2	48.7212
IL17RC	-0.09	48.7167
PAK1IP1	-0.08	48.6799
ACAP1	0.1	48.6576
INTS14	-0.06	48.5607
SLC25A44	-0.09	48.4473
CD7	0.05	48.4365
TULP3	-0.08	48.4202
COX4I1	0.23	48.3696
SIAH1	-0.13	48.3665
TUSC3	0.1	48.3625
MORF4L2	-0.24	48.3028
CST6	-0.41	48.2924
HNRNPU	-0.21	48.2807
SNCB	0.07	48.2774
SERPINB8	-0.15	48.2636
THUMPD3-AS1	-0.16	48.2204
IPO7	-0.1	48.2062
LSM1	-0.1	48.1746
MGLL	-0.18	48.1681
KMT5B	-0.16	48.1561
CCT2	-0.1	48.1319
SNRPB2	-0.16	48.1175
TROVE2	-0.1	48.1169
TRIM4	-0.07	48.1024
PRPF38A	-0.17	48.0841
CHD8	-0.07	48.064
PPM1B	-0.09	48.0453
WASL	-0.28	48.0218
DCT	0.07	47.9666
NAA30	-0.07	47.9508
ATAD2	-0.12	47.8962
PPP1CC	-0.19	47.8794
PAX8	-0.07	47.8794
TOM1L2	-0.11	47.8508
SDC4	-0.26	47.7959
USP36	-0.12	47.7375
SF3B4	-0.17	47.6021
GCH1	-0.12	47.6003
TEX10	-0.16	47.5918
RIT1	-0.17	47.5751
RPN1	-0.1	47.5638
SPAG9	-0.26	47.5591
IL1RL1	0.37	47.5157
ALYREF	-0.14	47.5017
SFN	-0.37	47.5003
ZCCHC8	-0.16	47.4737
ZNF430	-0.09	47.466
WDR83	-0.09	47.4248
MRPS10	-0.1	47.4202
MED1	-0.12	47.4145
TMPRSS6	-0.05	47.4101
FYB1	0.05	47.3625
KPNA2	-0.15	47.3625
MAOA	-0.18	47.3585
SNHG21	-0.09	47.3179
RNF217	-0.06	47.2823
GOT1	-0.12	47.2426
AEN	-0.08	47.1209
ERH	-0.13	47.04
SEC22A	-0.08	47.0119
MIF-AS1	0.04	47
RRP15	-0.07	46.9318
SFMBT1	-0.07	46.9101
SAMSN1	0.07	46.8894
AGFG1	-0.13	46.8894
CLINT1	-0.12	46.8761
USP10	-0.09	46.8729
DCUN1D5	-0.08	46.8697
ACAD9	-0.06	46.8297
C3orf62	-0.07	46.8013
FBXL3	-0.11	46.7696
C2orf49	-0.1	46.6383
YES1	-0.15	46.6326
SUSD6	-0.09	46.6253
PMPCB	-0.1	46.6055
SRSF1	-0.12	46.6003
PHTF2	-0.13	46.5482
PTGER3	-0.08	46.5482
KCMF1	-0.16	46.4547
SELL	0.04	46.4306
NWD2	-0.09	46.3747
AKAP8L	-0.11	46.3161
SCEL	-0.14	46.2832
ATP7A	-0.06	46.2306
HIST1H1C	0.22	46.2111
OST4	0.19	46.1884
AZIN1	-0.12	46.1818
ABLIM1	-0.18	46.1433
NUTM2B-AS1	-0.12	46.1355
NAP1L1	-0.19	46.1314
ARID2	-0.08	46.1215
AC005261.1	-0.09	46.0841
MTREX	-0.11	46.0315
CTTNBP2NL	-0.15	45.9957
KRT78	-0.19	45.983
SBDS	-0.31	45.8827
PPP6R1	-0.1	45.8729
UFC1	-0.18	45.8447
JUN	-0.3	45.8182
TMEM199	-0.09	45.8153
C4orf48	0.07	45.7305
DUSP7	-0.09	45.6615
AL158154.2	0.05	45.6517
TRAF3IP3	0.04	45.6364
SRP72	-0.15	45.58
AC106886.3	-0.05	45.5735
TCERG1	-0.08	45.5622
AC118549.1	-0.07	45.5498
PLAA	-0.09	45.5331
NFATC1	-0.12	45.5086
GIMAP4	0.04	45.5017
CUL5	-0.06	45.5003
SUZ12	-0.14	45.4935
THOP1	-0.09	45.4737
POLR2B	-0.09	45.4413
KRAS	-0.13	45.3809
PDZD8	-0.09	45.3546
EWSR1	-0.16	45.3487
ZBTB33	-0.06	45.3143
SCOC	-0.1	45.2907
HIPK1	-0.09	45.2848
SPPL2A	-0.12	45.2765
FAM111A	-0.06	45.2588
OGDH	-0.1	45.2204
ZFAND3	-0.16	45.1296
TRIB1	-0.15	45.1226
RSF1	-0.16	45.1124
PSMB8-AS1	0.03	45.0985
ABCE1	-0.09	45.0778
SRPK1	-0.11	45.0711
MUC15	-0.07	45.0329
CD3G	0.04	45.0306
AD000090.1	0.07	44.983
SEC22B	-0.11	44.9136
UBAP2L	-0.09	44.8182
PTS	-0.09	44.8013
FNDC3B	-0.07	44.7878
UTP15	-0.06	44.757
FKBPL	-0.07	44.7399
B4GALT1	-0.08	44.7235
LRRC37B	-0.08	44.7122
COPB2	-0.12	44.6904
SLK	-0.17	44.6799
RPL37A	0.36	44.6596
HBP1	-0.25	44.6162
CSKMT	0.12	44.6073
SPRTN	-0.07	44.5918
KIF26A	0.06	44.5817
TMEM159	-0.12	44.5406
ALDH1A3	0.27	44.5143
ZBTB10	-0.08	44.5045
RCAN1	-0.17	44.4935
TBC1D20	-0.09	44.4737
PIK3C3	-0.1	44.4698
UBE2D1	-0.25	44.3904
LLPH	-0.11	44.341
LBH	0.14	44.3251
RGS1	0.06	44.2358
PEF1	-0.1	44.2321
TEFM	-0.06	44.2062
G3BP1	-0.11	44.1707
KMT2C	-0.12	44.1273
MOSMO	-0.09	44.1152
A1BG	0.04	44.0867
TSC22D2	-0.16	44.0862
IFRD1	-0.27	44.0605
MARK2	-0.09	44
RPN2	-0.14	43.9957
ZNF586	-0.08	43.9872
AL078604.2	-0.05	43.983
COX7A2	-0.21	43.9431
SUB1	-0.28	43.8761
CDC42SE1	-0.16	43.8633
FBXO38	-0.06	43.8327
C5orf46	-0.08	43.8182
HNRNPM	-0.16	43.8182
PPP2R2A	-0.23	43.8013
XKR6	-0.05	43.7825
WBP2	-0.13	43.7747
RAD23B	-0.13	43.7212
PA2G4	-0.11	43.71
SLC25A3	-0.22	43.6615
EIF1AD	-0.08	43.6364
PSMA3-AS1	-0.14	43.6289
PABPC4	-0.11	43.6073
CRNKL1	-0.13	43.6021
ARL1	-0.08	43.5834
TSPYL4	-0.05	43.52
VTA1	-0.06	43.4547
ARPC4	-0.16	43.4413
PTP4A2	-0.15	43.3799
THUMPD2	-0.1	43.3737
ABCC1	-0.08	43.341
CAPZA2	-0.17	43.3206
PKN2	-0.09	43.2976
ANKRD49	-0.07	43.2388
CWC15	-0.1	43.2055
DCAF13	-0.08	43.1925
SRP54	-0.13	43.1838
RARG	-0.1	43.1824
NMD3	-0.08	43.1457
RPS3A	0.32	43.1379
USP4	-0.1	43.1284
CRAMP1	-0.06	43.067
GULP1	-0.13	43.0227
MEAF6	-0.12	43.0191
NMT1	-0.08	43.0191
CFAP53	-0.08	43.0155
ITCH	-0.1	42.983
SNRNP40	-0.09	42.9547
VPS50	-0.05	42.9208
HELZ2	0.07	42.8962
C11orf58	-0.18	42.8794
TMED2	-0.13	42.8508
CUL2	-0.07	42.8182
45542	-0.17	42.8097
AL049629.1	-0.06	42.8013
ATP2C1	-0.07	42.7878
BRWD1	-0.12	42.7825
GSTK1	0.07	42.7645
PHIP	-0.15	42.7595
ATP2A2	-0.15	42.7375
METAP2	-0.18	42.7212
IMP4	-0.08	42.6615
COPS4	-0.1	42.644
NEDD4	-0.06	42.58
UBE2D3	-0.33	42.567
ZNF416	-0.04	42.5114
HRH1	-0.07	42.4868
OVOL1	-0.21	42.399
GLS	-0.18	42.3507
ZDHHC21	0.1	42.3354
IWS1	-0.11	42.3242
UFM1	-0.23	42.2708
VPS37B	-0.23	42.2441
ATP5PB	-0.13	42.2211
PBRM1	-0.09	42.2197
CCNT2	-0.11	42.2154
XRN2	-0.1	42.1824
WIPF2	-0.15	42.1746
POR	-0.18	42.1433
SH2D4A	-0.07	42.1319
PIM1	-0.17	42.1107
C1orf198	-0.06	42.0783
PLRG1	-0.07	42.0521
CLN8	-0.11	42.0114
MED13L	-0.15	42.0074
CDC42	-0.25	41.9872
DHX29	-0.09	41.9469
DDX1	-0.07	41.9208
ERVK3-1	-0.07	41.9136
MAPKBP1	-0.11	41.9101
ADAM17	-0.14	41.8962
INSIG2	-0.08	41.8697
GPATCH8	-0.12	41.8386
CYCS	-0.23	41.8327
ARG1	-0.18	41.8239
AC074033.1	-0.12	41.8069
WDR46	-0.07	41.7932
DYNC1LI2	-0.12	41.7471
KPNA6	-0.12	41.7282
SF3B5	-0.15	41.7235
CPNE1	-0.09	41.6757
RAPGEF5	0.05	41.6576
HCCS	-0.12	41.6536
BAG5	-0.07	41.6144
SDHA	0.27	41.5935
SRP68	-0.1	41.5751
KIF1C	-0.12	41.5575
PSMB9	0.05	41.5129
ZMYM6	-0.06	41.4815
MCFD2	-0.11	41.4737
DEDD2	-0.21	41.4485
PRNP	-0.22	41.4353
PPM1A	-0.15	41.4157
TLE1	-0.06	41.3851
NPC2	0.13	41.3635
PRKD3	-0.06	41.3002
DNAJB12	-0.08	41.2396
SLC9A1	0.15	41.224
OTUD4	-0.06	41.1844
THAP9-AS1	-0.1	41.1739
HDGF	-0.1	41.1707
MBTD1	-0.06	41.129
VCP	-0.23	41.1249
PPP1CB	-0.26	41.0867
TIMM22	-0.07	41.0773
ATG3	-0.13	41.0747
FUBP1	-0.18	41.0726
45538	-0.06	41.0448
CSNK2A1	-0.11	41.0362
UNK	-0.07	41.0214
C9orf85	-0.1	40.983
SRSF4	-0.12	40.9586
EEA1	-0.08	40.9586
YTHDF2	-0.14	40.9101
PPIL4	-0.06	40.8508
ODR4	-0.1	40.8508
CTNNBL1	-0.07	40.8416
ZNF148	-0.09	40.8268
NDRG4	0.1	40.8069
GNAS	0.24	40.7721
DGAT2	-0.09	40.757
THOC7	-0.09	40.7305
RTCB	-0.09	40.719
SETD2	-0.08	40.7167
STRN3	-0.13	40.7077
PIAS1	-0.1	40.6904
TPRKB	-0.1	40.684
SNRPF	-0.11	40.6517
LINC01068	-0.04	40.6459
PPP2CA	-0.26	40.6421
TBC1D10C	0.03	40.6003
RPL23A	0.3	40.5935
LACC1	-0.05	40.5918
AMD1	-0.18	40.5834
DNAJC2	-0.1	40.58
POLR1C	-0.09	40.5702
TMEM50A	-0.21	40.5376
ENY2	-0.12	40.5302
COQ2	-0.04	40.52
PFDN2	-0.28	40.5157
NPIPB15	-0.05	40.4855
NARF	0.09	40.4283
CHST15	-0.05	40.4283
SREK1IP1	-0.32	40.399
KCTD9	-0.13	40.3335
TXNL1	-0.2	40.3307
SARS	-0.12	40.3279
HSPD1	-0.13	40.3206
NCF1	0.04	40.3161
RUNX3	0.04	40.301
CRCT1	0.52	40.2774
INO80	-0.1	40.2565
45541	0.04	40.1925
SRP9	-0.16	40.1824
TPR	-0.11	40.1824
DDX6	-0.18	40.1746
PRRC2C	-0.19	40.172
ATP5MC1	-0.1	40.15
SLC7A1	-0.07	40.1469
RYBP	-0.23	40.1361
ZNF654	-0.11	40.1068
AQR	-0.07	40.0846
GABARAPL1	-0.16	40.0545
SPRR1A	0.33	40.0241
RNF222	-0.17	40.0088
BNIP2	-0.11	40.007
SPCS2	-0.2	39.9872
PLA2G4C	-0.06	39.9788
NEPRO	-0.06	39.9747
CHCHD10	0.06	39.9666
NQO1	-0.09	39.9393
ARFGEF2	-0.07	39.9172
SSU72	-0.19	39.9136
MALL	0.16	39.9101
GPX2	-0.07	39.8894
ZNF432	-0.08	39.8297
CLDN12	-0.08	39.7932
SNIP1	-0.16	39.7825
PPP2R2C	0.08	39.7773
KCNK1	-0.19	39.7773
IGF2R	-0.1	39.7721
CIP2A	-0.06	39.752
KALRN	-0.06	39.7077
FRMD6	-0.09	39.6676
MORC3	-0.14	39.6383
USP15	-0.14	39.6326
RTKN	-0.05	39.6271
PLCD3	-0.11	39.618
PQLC1	-0.15	39.6091
BSDC1	-0.1	39.5702
RAET1E	-0.07	39.5498
SYNCRIP	-0.18	39.4976
AP1G1	-0.15	39.4802
ATG7	-0.07	39.4789
MSX2	-0.06	39.4318
AC016588.2	-0.05	39.4034
RPRD1B	-0.08	39.4034
FBXO2	0.07	39.3925
PLXDC2	-0.07	39.3915
STXBP5-AS1	-0.06	39.3778
RND3	-0.24	39.3526
ARF1	-0.26	39.3354
CTSD	0.19	39.3143
SKA2	-0.12	39.3072
MET	-0.07	39.289
CLIC2	-0.08	39.2749
TIMM8B	-0.11	39.2644
WNT2B	-0.07	39.2381
EVI2B	0.03	39.2358
SH3KBP1	-0.11	39.2154
SELENOT	-0.28	39.2111
GJB3	-0.1	39.1445
LUC7L2	-0.08	39.0921
TMEM11	-0.09	39.0453
MAGOHB	-0.05	39.0353
MRPL22	-0.08	39.0329
AP4E1	-0.07	39.0057
WBP1L	-0.06	39.0009
EFNB1	-0.06	38.9788
NFATC2	-0.06	38.9469
RAET1L	-0.09	38.9469
MAPK6	-0.18	38.9172
OASL	-0.17	38.8996
DENND4A	-0.07	38.8996
TMEM161B	-0.05	38.8928
ZNF57	-0.13	38.8827
LAMP3	0.06	38.8794
TMEM115	-0.07	38.8268
PSMC5	-0.11	38.7905
DPH3	-0.15	38.7773
OTUD5	-0.14	38.7305
EIF3G	-0.13	38.7144
PLEKHF2	-0.11	38.7077
DDI2	-0.1	38.7077
ANKRD13C	-0.1	38.7055
EGR2	-0.06	38.6421
SMG5	-0.09	38.6421
TBRG1	-0.07	38.6234
IL1R2	-0.18	38.6038
KAT6A	-0.09	38.5969
TENT5A	-0.14	38.5751
TENT2	-0.07	38.5719
SEMA4A	-0.07	38.5482
RTN4	-0.26	38.5452
SMURF1	-0.12	38.5129
SAFB	-0.14	38.51
VPS26A	-0.2	38.451
PMEPA1	-0.1	38.451
IRX3	-0.05	38.4134
FOSL1	-0.18	38.3565
ATP5MC2	0.13	38.3546
SPATA22	-0.04	38.3536
SLC35E1	-0.11	38.3536
RBBP8	-0.05	38.3279
C1D	-0.11	38.3161
LDLR	-0.09	38.2495
ALKBH1	-0.07	38.2373
TANC1	-0.06	38.2314
SMARCC1	-0.08	38.1662
RAMP1	0.09	38.1487
SYNRG	-0.14	38.1141
ENO2	0.05	38.1113
SAMD8	-0.12	38.0526
HNRNPAB	-0.14	38.0458
CAV2	-0.07	38.0429
TAF2	-0.07	38.0343
FAM214A	-0.15	38.032
GPX3	0.19	38.0241
GNB1	-0.11	37.9914
AC124798.1	-0.07	37.9914
HOOK3	-0.09	37.9872
WSB1	-0.22	37.9788
MT-ND5	-0.23	37.9626
NAB1	-0.06	37.9172
SNRPG	-0.22	37.8996
BATF	0.04	37.8996
MRPL21	-0.09	37.8962
BCL3	-0.08	37.8729
45356	-0.19	37.857
TEAD1	-0.21	37.8182
EIF4E	-0.2	37.7799
LYPLA1	-0.17	37.7645
FBXO11	-0.13	37.752
PCYT1A	-0.09	37.7471
CARD14	-0.06	37.7471
TXNL4A	-0.1	37.7423
TM9SF3	-0.14	37.7305
CD27	0.03	37.7235
TMEM91	0.04	37.7144
YTHDC2	-0.06	37.6968
RNF10	-0.2	37.6925
ANKRD17	-0.13	37.6737
C1orf56	-0.1	37.6615
ASXL1	-0.09	37.6289
ITGB8	-0.08	37.6126
MIER1	-0.1	37.6126
RPLP2	0.32	37.6038
AMN1	0.08	37.58
SPTSSA	0.14	37.5702
DEFB4B	0.09	37.5513
NOL7	-0.1	37.5391
ATAD2B	-0.09	37.5317
TRAF3	-0.06	37.5258
TRIM33	-0.15	37.5143
ZHX1	-0.06	37.4724
GPR171	0.04	37.4473
KANSL1	-0.13	37.4342
SPEN	-0.09	37.4318
GPBP1L1	-0.14	37.3883
GAREM1	-0.07	37.3809
HIST2H2BE	-0.14	37.295
TMEM123	-0.14	37.2741
MYSM1	-0.13	37.2733
IST1	-0.22	37.2716
PSMD13	-0.13	37.2358
LEMD3	-0.09	37.224
RARS	-0.06	37.2076
HGS	-0.09	37.1898
SHOC2	-0.09	37.1586
EIF3M	-0.11	37.104
NDUFS6	-0.14	37.1018
ZNF791	-0.08	37.0904
TRA2B	-0.25	37.0835
HNRNPC	-0.27	37.056
DENND6A	-0.06	37.0218
SAT1	0.25	37.0177
MYO1G	0.05	36.983
ASXL2	-0.09	36.9586
PNPLA1	-0.06	36.9318
ECT2	-0.05	36.9318
PRDM1	-0.27	36.9281
NOLC1	-0.11	36.9136
NSF	-0.08	36.9066
CRK	-0.13	36.9031
B4GALT2	-0.06	36.8729
MTCH1	-0.21	36.8729
SREK1	-0.1	36.8633
MAFG	-0.18	36.8633
NR2C2	-0.1	36.857
CSTF3	-0.07	36.8539
MIAT	0.03	36.8477
RFX1	-0.09	36.7773
HSP90B1	-0.21	36.6904
CAPZA1	-0.15	36.6819
RBBP7	-0.07	36.6737
KDM7A	-0.1	36.6345
CCL27	-0.07	36.6234
KPNB1	-0.12	36.6108
NECAP1	-0.06	36.6073
TMEM170A	-0.07	36.6055
EMC7	-0.09	36.5918
RAP2B	0.18	36.5391
XG	-0.14	36.5391
CEP350	-0.11	36.5376
FLRT2	-0.05	36.5258
RPS4X	0.29	36.5186
YWHAG	-0.15	36.4698
FTH1	0.35	36.4112
CCNH	-0.07	36.4045
XKRX	-0.14	36.3904
RC3H1	-0.12	36.3242
RPS27L	0.14	36.3179
IL1RN	-0.29	36.3063
PRDX5	0.14	36.295
CCDC93	-0.09	36.2765
ATP6V1E1	-0.13	36.2757
USP34	-0.13	36.27
SERINC3	-0.22	36.2449
RRM2B	-0.05	36.2373
TBC1D3D	-0.03	36.2118
SFT2D2	-0.15	36.2083
WASHC5	-0.06	36.1778
PIAS3	-0.05	36.1726
ZBTB5	-0.08	36.1494
CS	-0.06	36.1421
GALNT1	-0.11	36.1409
PRR14L	-0.06	36.1209
UBE2W	-0.09	36.1158
RHOH	0.03	36.0996
SIRPA	0.09	36.0942
TERF1	-0.06	36.0737
GOLGA2	-0.12	36.067
ATP6V1A	-0.09	36.0477
ATP6V1B2	-0.23	35.9957
METTL18	-0.05	35.9508
RASGEF1B	-0.25	35.9245
AC016831.1	0.08	35.9208
DARS-AS1	0.04	35.8761
TATDN1	-0.07	35.8477
CPXM2	-0.05	35.8297
THUMPD1	-0.06	35.8297
HADHB	-0.09	35.8182
ATP6AP2	-0.12	35.7986
FRS2	-0.07	35.7825
GTPBP4	-0.14	35.7721
RPS2	0.29	35.7545
FBXO28	-0.09	35.7144
ETF1	-0.24	35.7077
DTX2	-0.07	35.6819
MAPK8IP1	-0.04	35.6716
PFDN6	-0.08	35.6402
ALDH3A2	-0.09	35.6108
TCIRG1	0.04	35.5884
ZFC3H1	-0.11	35.567
WDR33	-0.1	35.5638
POLE3	-0.07	35.5575
MEX3C	-0.12	35.5114
WSB2	-0.07	35.4962
FAF1	-0.07	35.4698
JAML	0.04	35.4498
RPS11	0.26	35.4389
GCLC	-0.1	35.4214
LGALS8	-0.11	35.4168
SLCO4A1	-0.12	35.4045
SCAF1	-0.07	35.342
CCL21	-0.03	35.2765
ARCN1	-0.1	35.2291
RARRES3	0.03	35.2262
MRPL54	-0.08	35.2125
SPOCK2	0.03	35.2
TJP1	-0.22	35.1986
RHCG	0.35	35.1945
AC003092.1	-0.14	35.1898
YIPF4	-0.15	35.1824
C1orf54	-0.05	35.1811
TMEM176B	0.05	35.1688
AQP3	-0.17	35.1574
CDKN2AIP	-0.1	35.104
KIN	-0.09	35.091
HSPA4	-0.1	35.0783
PSMG2	-0.09	35.0526
RBPJ	-0.11	35.0491
TOB1	-0.22	35.0482
DCAF10	-0.09	35.0477
UBE3C	-0.06	35.0031
CCDC9B	-0.04	34.9747
GABARAP	-0.11	34.9706
LCE1F	0.19	34.9666
TMEM254	-0.11	34.9355
GOSR1	-0.06	34.9245
MT1E	-0.15	34.9136
MCC	-0.08	34.9101
CMAS	-0.07	34.8761
RIPK2	-0.06	34.8697
RAPGEF6	-0.07	34.8041
CAB39	-0.13	34.8041
ZMYM4	-0.05	34.7932
ALDH2	0.07	34.7721
ACTG1	0.4	34.7645
AC010329.1	-0.07	34.757
ENOPH1	-0.05	34.7496
ZCCHC2	-0.05	34.7423
TM7SF2	-0.09	34.699
TRIM62	-0.05	34.6536
DHX38	-0.06	34.6459
RNF19A	-0.09	34.644
PTBP1	-0.16	34.6144
GPD2	-0.04	34.5719
FAM204A	-0.06	34.5654
DNAJC5	-0.14	34.5654
SEC11A	-0.12	34.5361
SNX11	-0.08	34.5272
DIAPH1	-0.15	34.5214
PTPRE	-0.13	34.4045
UBE4A	-0.08	34.3696
PRPF39	-0.06	34.3615
MUC20	0.04	34.3251
CHD4	-0.12	34.3224
MAP2K1	0.1	34.3072
CHST2	0.04	34.2899
EPC1	-0.15	34.279
RALGAPB	-0.07	34.2749
BMP2	-0.08	34.251
SYS1	-0.08	34.2418
CCT8	-0.09	34.2277
SUMO1	-0.15	34.2069
GMEB1	-0.08	34.1986
ZBED5	-0.06	34.1884
CPTP	-0.06	34.1662
PROSER2	-0.05	34.1439
POLR3F	-0.04	34.1349
RPL36AL	-0.23	34.1267
ZNF674	-0.05	34.1079
UCP2	0.03	34.1029
SLC35A4	-0.06	34.0438
PHF5A	-0.11	34.0301
LCE5A	0.05	34.0264
ACOX1	-0.16	34.0246
EFR3A	-0.06	34.0237
MSL2	-0.05	34.0164
COPRS	-0.08	33.9957
EMC3	-0.12	33.9547
PPP6C	-0.11	33.9469
IDE	-0.06	33.9355
DCP2	-0.1	33.9101
CLDN1	-0.23	33.8665
MON1B	-0.06	33.8601
AEBP2	-0.06	33.8539
IL13RA1	0.07	33.8447
FARP1-AS1	-0.04	33.8386
IRF1	-0.15	33.8268
GTF2A1	-0.08	33.821
SMN1	-0.03	33.7595
SEMA3C	-0.17	33.7471
TANK	-0.14	33.7471
CLASP2	-0.05	33.7167
ACVR1B	-0.06	33.7011
C15orf59	-0.03	33.699
RHOA	-0.23	33.699
POU2F1	-0.11	33.684
YTHDF1	-0.07	33.6778
ANKHD1	-0.08	33.6478
RNF223	-0.19	33.618
PTEN	-0.09	33.6038
CCR7	0.07	33.5901
GIPC1	-0.15	33.5784
USP2	-0.1	33.5591
GOLGA3	-0.08	33.5287
MED10	-0.15	33.5258
AC114760.2	0.03	33.5058
CSNK2A2	-0.07	33.4908
MED21	-0.17	33.4685
CLTB	-0.27	33.4622
TEAD3	-0.12	33.4485
PRDM2	-0.13	33.4389
AOC2	-0.05	33.4237
TSN	-0.06	33.4089
STARD10	-0.1	33.4045
SF3B6	-0.24	33.382
GPATCH2	-0.07	33.382
TUBA1B	-0.16	33.3768
RDH12	-0.08	33.3696
AVL9	-0.06	33.3615
TOLLIP	-0.15	33.3497
GTPBP1	-0.16	33.341
NBPF14	-0.12	33.3391
PRPF40A	-0.1	33.3298
MYNN	-0.09	33.2874
CCT4	-0.17	33.2226
MOSPD2	-0.06	33.209
HBS1L	-0.06	33.1791
HSPA2	-0.12	33.1791
PAQR7	-0.05	33.1752
DNAJB4	-0.08	33.15
BANP	-0.09	33.1409
TOPORS	-0.1	33.1308
RBM27	-0.05	33.0975
ITGA6	-0.07	33.0757
SREBF2	-0.09	33.0737
RALGDS	-0.12	33.0711
ARHGAP32	-0.17	33.0434
SFPQ	-0.26	33.0097
RCSD1	0.04	33.0088
UBN1	-0.12	32.9706
ACP5	0.05	32.9706
MRPL13	-0.07	32.9626
ARFGEF1	-0.08	32.9547
NDEL1	-0.15	32.9508
TAB2	-0.12	32.9508
VHL	-0.06	32.9355
REXO2	-0.13	32.9208
GID4	-0.06	32.8894
GTF2E2	-0.09	32.7878
C1orf74	-0.05	32.7825
QKI	-0.17	32.7773
MCMBP	-0.05	32.7696
RAB5A	-0.24	32.7545
IL10RA	0.04	32.7375
MTFR1	-0.06	32.7258
DCTN4	-0.08	32.6696
LRRC40	-0.05	32.6216
GTPBP2	-0.1	32.6073
VAMP5	0.05	32.6003
SMDT1	-0.14	32.5482
EPG5	-0.19	32.5243
SLMAP	-0.11	32.5072
SBF2-AS1	-0.05	32.4895
YTHDF3	-0.14	32.466
HNRNPK	-0.21	32.4572
MOB1A	-0.15	32.4522
TP53RK	-0.05	32.4401
RPS26	-0.26	32.4318
AJAP1	0.04	32.4191
SP2	-0.09	32.4145
PPP4R4	-0.05	32.4134
CA11	-0.05	32.4112
DAPK3	-0.1	32.3675
CSDE1	-0.18	32.3556
RAP2C	-0.08	32.3233
AC010503.4	-0.07	32.308
MRPS9	-0.05	32.3063
APOBEC3G	0.03	32.3063
AMMECR1L	-0.06	32.2807
MED8	-0.14	32.2684
RNF139	-0.1	32.2652
[truncated: 3,001 more rows]
