# Supplementary material for: Downregulation of semaphorin 4A in keratinocytes reflects the features of non-lesional psoriasis
Source: eLife. 2024 Dec 31;13:RP97654. doi: 10.7554/eLife.97654 (PMC11687936; doi:10.7554/eLife.97654)
Supplement: Figure 2—figure supplement 2—source data 1. [file elife-97654-fig2-figsupp2-data1.xlsx]

## Sheet: Figure 2-figure supplement 2B
Mann-Whitney test
WT	KO
0.23	0.2
0.21	0.2
0.21	0.21
0.22	0.2
0.27	0.23
0.22	0.21
0.21	0.23
0.22	0.22
0.2	0.2
0.23	0.21
0.21	0.25
0.22	0.2
	Average ± SD
WT (n = 12)	0.2208 ± 0.01782
KO (n = 12)	0.2133 ± 0.01614
	p value
	p = 0.1940

## Sheet: Figure 2-figure supplement 2C
Mann-Whitney test
Epi			Derm
WT	KO		WT	KO
20	21.8		44	46.2
17.8	23		43.1	47.6
19.4	23.4		33.6	43.5
22.1	23.6		38.7	43.6
17.3	21.3		34.8	52.5
23.4	18.1		40.9	33.4
21.1	24.7		34.7	39.2
21.1	22.7		27.4	33.5
16.4	17.5		23.7	34.4
20.8	25.4		34.4	29.8
17.2	24.4		33.2	36.7
18.2	16.2		30.4	27.1
	Average ± SD			Average ± SD
WT (n = 12)	19.57 ± 2.201		WT (n = 12)	34.91 ± 6.085
KO (n = 12)	21.84 ± 3.014		KO (n = 12)	38.96 ± 7.768
	p value			p value
	*p = 0.0345			p = 0.2722

## Sheet: Figure 2-figure supplement 2D
Mann-Whitney test
Epi															Derm
Vγ3			Vγ2			DNγδ			CD4			CD8			Vγ3			Vγ2			DNγδ			CD4			CD8
WT	KO		WT	KO		WT	KO		WT	KO		WT	KO		WT	KO		WT	KO		WT	KO		WT	KO		WT	KO
52.2022	61.9587		7.3387	5.4923		10	7.476		0.5769	4.1222		1.5695	1.382		8.735	15.08		2.33	5.2365		4.4473	7.0723		0.915	1.7834		4.7984	3.4531
59.7834	50.5311		7.147	8.6024		13.417	12.1711		1.7882	4.8809		1.7137	2.2842		12.0045	9.5382		4.8768	5.752		7.3811	8.9245		2.0278	1.8775		4.4915	3.1881
86.4535	71.5533		4.82	6.5727		4.9736	12.5783		1.4925	4.2525		0.6813	1.9397		42.7102	50.9033		11.7578	11.9141		12.816	15.4541		5.1734	4.4189		13.4039	6.958
84.1073	62.9096		4.1115	12.8291		5.2632	13.7912		3.6078	6.7426		0.9494	1.0466		51.8641	39.0195		7.3148	24.4216		11.4913	12.8167		6.9608	6.6654		9.6036	6.5553
89.1187	71.3961		2.4393	8.3438		3.1194	11.2945		1.3321	2.91		1.6075	2.2394		62.7238	38.0707		5.6747	11.0653		6.4061	18.9838		4.0101	5.5713		10.9458	9.5177
	Average ± SD			Average ± SD			Average ± SD			Average ± SD			Average ± SD			Average ± SD			Average ± SD			Average ± SD			Average ± SD			Average ± SD
WT (n = 5)	74.33 ± 17.05		WT (n = 5)	5.171 ± 2.080		WT (n = 5)	7.355 ± 4.235		WT (n = 5)	1.760 ± 1.126		WT (n = 5)	1.304 ± 0.4593		WT (n = 5)	35.61 ± 24.13		WT (n = 5)	6.391 ± 3.498		WT (n = 5)	8.508 ± 3.523		WT (n = 5)	3.817 ± 2.418		WT (n = 5)	8.649 ± 3.902
KO (n = 5)	63.67 ± 8.631		KO (n = 5)	8.368 ± 2.804		KO (n = 5)	11.46 ± 2.403		KO (n = 5)	4.582 ± 1.403		KO (n = 5)	1.778 ± 0.5448		KO (n = 5)	30.52 ± 17.49		KO (n = 5)	11.68 ± 7.737		KO (n = 5)	12.65 ± 4.822		KO (n = 5)	4.063 ± 2.188		KO (n = 5)	5.934 ± 2.644
	p value			p value			p value			p value			p value			p value			p value			p value			p value			p value
	p = 0.4206			p = 0.0952			p = 0.1508			*p = 0.0159			p = 0.2222			p = 0.6905			p = 0.2222			p = 0.1508			p > 0.9999			p = 0.2222

## Sheet: Figure 2-figure supplement 2E
Mann-Whitney test
Epi															Derm
Vγ3			Vγ2			DNγδ			CD4			CD8			Vγ3			Vγ2			DNγδ			CD4			CD8
WT	KO		WT	KO		WT	KO		WT	KO		WT	KO		WT	KO		WT	KO		WT	KO		WT	KO		WT	KO
0.335	1.2986		1.2221	4.5392		1.9293	5.814		0.1799	2.6151		0.0248	0.0834		0.6064	0.6294		1.3512	4.3623		1.6066	5.4113		0.1702	0.8392		0.0213	0.1661
1.0546	1.7982		1.7137	7.6928		3.4674	11.2615		0.8654	3.3812		0.2121	0.7082		0.3042	1.1442		2.2711	4.8471		2.9606	4.9563		0.5881	0.9985		0.0203	0.078
0.1496	0.3581		3.8631	5.5282		4.0128	11.0937		0.8939	2.5216		0.0866	1.0146		0.2646	0.0977		8.4656	6.8359		10.3175	11.0596		0.823	0.8545		0.2058	0.3418
0.1775	0.3301		3.2157	7.4149		4.5986	12.6681		2.5841	4.118		0.128	0.2335		0.1416	0.0734		4.0113	14.7999		8.2822	9.0158		1.3922	0.9732		0.0472	0.0734
0.0731	0.3048		1.6749	7.4416		2.1808	9.7338		0.7194	1.5525		0.1068	0.8779		0.1009	0.1806		3.203	6.113		3.9596	12.9997		0.4288	0.748		0.1261	0.2579
	Average ± SD			Average ± SD			Average ± SD			Average ± SD			Average ± SD			Average ± SD			Average ± SD			Average ± SD			Average ± SD			Average ± SD
WT (n = 5)	0.3580 ± 0.4009		WT (n = 5)	2.338 ± 1.137		WT (n = 5)	3.238 ± 1..155		WT (n = 5)	1.049 ± 0.9053		WT (n = 5)	0.1117 ± 0.06810		WT (n = 5)	0.2835 ± 0.1991		WT (n = 5)	3.860 ± 2.761		WT (n = 5)	5.425 ± 3.705		WT (n = 5)	0.6805 ± 0.4634		WT (n = 5)	0.08414 ± 0.08055
KO (n = 5)	0.8180 ± 0.6901		KO (n = 5)	6.523 ± 1.408		KO (n = 5)	10.11 ± 2.619		KO (n = 5)	2.838 ± 0.9664		KO (n = 5)	0.5835 ± 0.4064		KO (n = 5)	0.4251 ± 0.4608		KO (n = 5)	7.392 ± 4.257		KO (n = 5)	8.689 ± 3.499		KO (n = 5)	0.8827 ± 0.1030		KO (n = 5)	01834 ± 0.1163
	p value			p value			p value			p value			p value			p value			p value			p value			p value			p value
	p = 0.1508			**p = 0.0079			**p = 0.0079			*p = 0.0317			p = 0.0952			p > 0.9999			p = 0.0952			p = 0.1508			p = 0.2222			p = 0.1508
