# Supplementary material for: Downregulation of semaphorin 4A in keratinocytes reflects the features of non-lesional psoriasis
Source: eLife. 2024 Dec 31;13:RP97654. doi: 10.7554/eLife.97654 (PMC11687936; doi:10.7554/eLife.97654)
Supplement: Figure 2—source data 1. [file elife-97654-fig2-data1.xlsx]

## Sheet: Figure 2B
Mann-Whitney test
WT	KO
0.19	0.245
0.195	0.25
0.195	0.225
0.19	0.245
0.195	0.225
0.19	0.24
0.195	0.275
0.225	0.225
0.24	0.21
0.225	0.25
0.185	0.235
0.2	0.21
0.19	0.22
0.17	0.215
0.185	0.23
	Average ± SD
WT (n = 15)	0.1980 ± 0.01821
KO (n = 15)	0.2333 ± 0.01780
	p value
	****p < 0.0001

## Sheet: Figure 2C
Mann-Whitney test
WT	KO
0.833542	3.18628
1.23257	3.58022
0.996782	2.82137
1.07483	4.5857
0.862275	4.82196
	Average ± SD
WT (n = 5)	1.00 ± 0.1631
KO (n = 5)	3.799 ± 0.8724
	p value
	**p = 0.0079

## Sheet: Figure 2D
Mann-Whitney test
Epi															Derm
Vγ3			Vγ2			DNγδ			CD4			CD8			Vγ3			Vγ2			DNγδ			CD4			CD8
WT	KO		WT	KO		WT	KO		WT	KO		WT	KO		WT	KO		WT	KO		WT	KO		WT	KO		WT	KO
87.1724	38.5729		1.55774	15.9911		7.51778	30.5858		0.846597	1.97548		0.257365	0.783379		70.1543	37.7186		3.53782	16.9714		14.7535	31.0811		3.57546	3.61685		1.20437	1.55008
86.8424	49.5684		1.95381	11.8854		7.4303	28.2247		0.985653	2.47717		0.262452	0.78819		57.3298	70.533		6.46597	11.6694		21.911	27.0956		5.86387	5.72904		1.41361	2.01925
77.0579	36.425		1.64435	6.26748		14.7007	51.9607		4.90351	4.38519		1.19141	0.327355		66.53	18.2492		2.4607	8.75394		24.6525	66.3407		4.80747	4.36909		0.113921	0.205047
80.7118	34.8368		3.02533	6.72376		13.5113	49.0685		2.1013	7.41894		0.212183	0.706301		69.5606	31.3487		4.75884	7.62792		20.1715	53.6008		2.78671	4.15351		0.407288	0.521162
65.3747	49.3433		4.82258	4.06867		18.1311	36.1598		1.98213	3.36001		0.079639	0.818621		14.9788	18.3178		5.38472	3.95399		14.1178	20.9058		2.8427	4.61538		0.451005	0.747664
63.5508	42.0183		5.25522	7.26513		21.7488	33.976		2.35242	9.08691		0.0976476	0.23093		24.755	18.678		5.46844	6.77434		16.3661	12.2925		3.74363	4.81531		0.490004	0.717811
	Average ± SD			Average ± SD			Average ± SD			Average ± SD			Average ± SD			Average ± SD			Average ± SD			Average ± SD			Average ± SD			Average ± SD
WT (n = 6)	76.79 ± 10.29		WT (n = 6)	3.043 ± 1.638		WT (n = 6)	13.84 ± 5.71-07		WT (n = 6)	2.195 ± 1.463		WT (n = 6)	0.3501 ± 0.4195		WT (n = 6)	50.55 ± 24.40		WT (n = 6)	4.679 ± 1.452		WT (n = 6)	18.66 ± 4.241		WT (n = 6)	3.937 ± 1.197		WT (n = 6)	0.6800 ± 0.5092
KO (n = 6)	41.79 ± 6.404		KO (n = 6)	8.700 ± 4.396		KO (n = 6)	38.33 ± 9.868		KO (n = 6)	4.784 ± 2.858		KO (n = 6)	0.6091 ± 0.2601		KO (n = 6)	32.47 ± 20.35		KO (n = 6)	9.292 ± 4.528		KO (n = 6)	35.22 ± 20.59		KO (n = 6)	4.550 ± 0.7107		KO (n = 6)	0.9602 ± 0.6836
	p value			p value			p value			p value			p value			p value			p value			p value			p value			p value
	**p = 0.0022			**p = 0.0087			**p = 0.0022			p = 0.0931			p = 0.1320			p = 0.4848			*p = 0.0260			p = 0.1320			p = 0.3095			p = 0.3095

## Sheet: Figure 2E
Mann-Whitney test
Epi															Derm
Vγ3			Vγ2			DNγδ			CD4			CD8			Vγ3			Vγ2			DNγδ			CD4			CD8
WT	KO		WT	KO		WT	KO		WT	KO		WT	KO		WT	KO		WT	KO		WT	KO		WT	KO		WT	KO
0	0.10218		0.921097	6.52248		2.97325	16.468		0.209956	0.544959		0.020318	0.27248		0	0.119237		2.18291	7.63116		4.89274	16.0175		0.263455	0.437202		0	0.238474
0	0.062555		1.14312	5.00438		2.93363	18.266		0.268284	0.863255		0.034994	0.312774		0	0.02348		3.48168	6.43344		11.0995	15.4262		1.43979	1.36182		0.26178	0.493073
0.433241	0.184137		1.22095	5.63323		12.7314	47.4119		1.44742	2.4688		0.039386	0.095478		0.273411	0.205047		1.86831	8.39117		22.6475	63.265		1.95944	2.01893		0	0.11041
0.390144	0.055614		2.41615	6.09532		11.8275	36.7721		0.835044	3.23675		0.041068	0.15572		0.407288	0.11055		3.92283	7.15414		17.6849	44.9147		0.578778	1.753		0.0643087	0.063171
0.106185	0.122182		3.90231	3.65325		15.9809	34.0766		0.999912	1.6739		0	0.336001		0.0820008	0.043134		4.68771	3.53702		11.0291	17.9295		0.929343	1.56722		0.0546672	0.15816
0.213049	0.124629		4.66045	6.84359		20.9143	32.8837		1.35819	4.65159		0.044385	0.117298		0.0784006	0.059818		5.01764	6.01166		13.7593	9.57081		1.31321	1.97398		0.0784006	0.089726
	Average ± SD			Average ± SD			Average ± SD			Average ± SD			Average ± SD			Average ± SD			Average ± SD			Average ± SD			Average ± SD			Average ± SD
WT (n = 6)	0.1904 ± 0.1892		WT (n = 6)	2.377 ± 1.582		WT (n = 6)	11.23 ± 7.155		WT (n = 6)	0.8531 ± 0.5265		WT (n = 6)	0.03003 ± 0.01695		WT (n = 6)	0.1402 ± 0.1647		WT (n = 6)	3.527 ± 1.287		WT (n = 6)	13.52 ± 6.119		WT (n = 6)	1.081 ± 0.6161		WT (n = 6)	0.07653 ± 0.09660
KO (n = 6)	0.1085 ± 0.04715		KO (n = 6)	5.625 ± 1.165		KO (n = 6)	30.98 ± 11.74		KO (n = 6)	2.240 ± 1.546		KO (n = 6)	0.2150 ± 0.1047		KO (n = 6)	0.09354 ± 0.06629		KO (n = 6)	6.526 ± 1.691		KO (n = 6)	27.85 ± 21.32		KO (n = 6)	1.519 ± 0.5846		KO (n = 6)	0.1922 ± 0.1598
	p value			p value			p value			p value			p value			p value			p value			p value			p value			p value
	p = 0.6602			**p = 0.0087			**p = 0.0087			p = 0.0931			**p = 0.0022			p > 0.9999			*p = 0.0152			p = 0.2403			p = 0.1797			p = 0.0887

## Sheet: Figure 2F
Mann-Whitney test
γδ			CD4			CD8
WT	KO		WT	KO		WT	KO
0.531492	0.341659		0.218849	0.155039		0.017053	0.040195
0.4922	0.718099		0.171391	0.126352		0.019776	0.050541
0.385179	0.232471		0.34737	0.174978		0.007089	0.113736
0.236672	0.23655		0.081652	0.281303		0.024851	0.086309
1.36327	2.32822		1.20289	1.16411		0.160385	0.141965
3.72272	0.601685		2.05391	0.962696		0.256739	0
0.901804	2.05314		1.45291	2.53623		0.1002	0.181159
1.63265	1.80258		1.38776	1.20172		0.081633	0.042918
1.03917	1.95997		2.07834	1.29274		0	0.166806
	Average ± SD			Average ± SD			Average ± SD
WT (n = 9)	1.145 ± 1.073		WT (n = 9)	0.9995 ± 0.8090		WT (n = 9)	0.07419 ± 0.08671
KO (n = 9)	1.142 ± 0.8734		KO (n = 9)	0.8772 ± 0.7948		KO (n = 9)	0.09151 ± 0.06307
	p value			p value			p value
	p > 0.9999			p = 0.5457			p = 0.3518
