# Supplementary material for: Downregulation of semaphorin 4A in keratinocytes reflects the features of non-lesional psoriasis
Source: eLife. 2024 Dec 31;13:RP97654. doi: 10.7554/eLife.97654 (PMC11687936; doi:10.7554/eLife.97654)
Supplement: Figure 3—figure supplement 1—source data 1. [file elife-97654-fig3-figsupp1-data1.xlsx]

## Sheet: Figure 3-figure supplement 1A
Mann-Whitney test
WT→WT	WT→KO
0.956032	0.001779
1.10655	0.002034
0.73829	0.002896
0.747163	0.000148
0.898778	0.000481
0.825815	0.002529
1.76581	0.001591
0.961564
	Average ± SD
WT (n = 8)	1.00 ± 0.3326
KO (n = 7)	0.001637 ± 0.001009
	p value
	***p = 0.0003

## Sheet: Figure 3-figure supplement 1B
Mann-Whitney test
Epi															Derm
Vγ3			Vγ2			DNγδ			CD4			CD8			Vγ3			Vγ2			DNγδ			CD4			CD8
WT→WT	WT→KO		WT→WT	WT→KO		WT→WT	WT→KO		WT→WT	WT→KO		WT→WT	WT→KO		WT→WT	WT→KO		WT→WT	WT→KO		WT→WT	WT→KO		WT→WT	WT→KO		WT→WT	WT→KO
88.7196	78.2766		0.57892	1.52169		4.13758	4.23274		1.68568	7.33442		0.98757	2.30877		39.0641	29.549		1.62986	8.34629		13.775	12.4935		16.2461	22.1877		3.04942	4.92483
78.9591	74.0604		1.18402	1.38092		2.51603	4.6897		5.16362	5.10668		1.88291	3.94238		49.5387	20.1961		5.11001	9.5098		5.99716	7.48366		13.2009	24.183		6.35202	7.02614
68.3737	62.6355		2.26096	3.30861		3.73195	4.27838		6.34704	7.70108		3.51403	3.45123		12.4024	18.7179		1.17057	4.16667		1.97882	3.76068		6.41026	6.26068		5.88071	2.73504
55.8265	58.048		0.733707	2.26289		1.2732	3.16804		9.19292	10.429		7.40181	4.01417		6.9469	18.0393		0.50885	1.88127		1.63717	2.67558		9.24779	6.9189		3.53982	3.4908
72.4116	58.0542		2.28339	2.12642		2.09572	12.0594		7.78855	11.0108		2.78386	4.5587		19.3805	10.8189		4.15929	7.06236		4.51327	6.23591		17.0797	24.0421		8.76106	3.98197
51.4038	72.8601		5.58908	1.30774		7.53083	2.22486		6.40252	11.7867		11.0994	3.27785		29.0584	33.3034		4.05844	4.22472		2.5974	6.24719		12.987	22.8315		5.51948	4.58427
	Average ± SD			Average ± SD			Average ± SD			Average ± SD			Average ± SD			Average ± SD			Average ± SD			Average ± SD			Average ± SD			Average ± SD
WT→WT (n = 6)	69.26 ± 14.02		WT→WT (n = 6)	2.105 ± 1.858		WT→WT (n = 6)	3.548 ± 2.218		WT→WT (n = 6)	6.097 ± 2.566		WT→WT (n = 6)	4.612 ± 3.873		WT→WT (n = 6)	26.07 ± 6.28		WT→WT (n = 6)	2.773 ± 1.899		WT→WT (n = 6)	5.083 ± 4.569		WT→WT (n = 6)	12.53 ± 4.084		WT→WT (n = 6)	5.517 ± 2.066
WT→KO (n = 6)	67.32 ± 8.831		WT→KO (n = 6)	1.985 ± 0.7599		WT→KO (n = 6)	5.109 ± 3.522		WT→KO (n = 6)	8.895 ± 2.585		WT→KO (n = 6)	3.592 ± 0.7747		WT→KO (n = 6)	21.77 ± 8.236		WT→KO (n = 6)	5.865 ± 2.909		WT→KO (n = 6)	6.483 ± 3.440		WT→KO (n = 6)	17.74 ± 8.670		WT→KO (n = 6)	4.457 ± 1.481
	p value			p value			p value			p value			p value			p value			p value			p value			p value			p value
	p > 0.9999			p = 0.6991			p = 0.2403			p = 0.1797			p = 0.8182			p = 0.8182			*p = 0.0411			p = 0.2403			p = 0.3095			p = 0.3939
