# Supplementary material for: Downregulation of semaphorin 4A in keratinocytes reflects the features of non-lesional psoriasis
Source: eLife. 2024 Dec 31;13:RP97654. doi: 10.7554/eLife.97654 (PMC11687936; doi:10.7554/eLife.97654)
Supplement: Figure 3—source data 1. [file elife-97654-fig3-data1.xlsx]

## Sheet: Figure 3B
Kruskal-Wallis test/ Dunn's multiple comparisons test
WT→WT	WT→KO	KO→WT	KO→KO
0.205	0.23	0.215	0.245
0.21	0.21	0.205	0.245
0.2	0.24	0.195	0.23
0.2	0.21	0.205	0.235
0.21	0.225	0.2	0.23
0.195	0.215	0.225	0.22
0.195	0.215	0.215	0.25
0.185	0.205	0.215	0.23
0.205	0.24	0.215	0.23
0.205	0.23
0.205	0.22
0.21	0.225
0.195	0.21
0.205
	Average ± SD
WT→WT (n = 14)	0.2018 ± 0.007234
WT→KO (n = 13)	0.2212 ± 0.01157
KO→WT (n = 9)	0.2100 ± 0.009354
KO→KO (n = 9)	0.2350 ± 0.009682
	p value
WT→WT vs. WT→KO	**p = 0.0019
WT→WT vs. KO→WT	p = 0.7988
WT→WT vs. KO→KO	****p < 0.0001
WT→KO vs. KO→WT	p = 0.5096
WT→KO vs. KO→KO	p = 0.4562
KO→WT vs. KO→KO	**p = 0.0078

## Sheet: Figure 3C
Mann-Whitney test
Epi															Derm
Vγ3			Vγ2			DNγδ			CD4			CD8			Vγ3			Vγ2			DNγδ			CD4			CD8
WT→WT	WT→KO		WT→WT	WT→KO		WT→WT	WT→KO		WT→WT	WT→KO		WT→WT	WT→KO		WT→WT	WT→KO		WT→WT	WT→KO		WT→WT	WT→KO		WT→WT	WT→KO		WT→WT	WT→KO
0.025541	0.029151		0.059595	1.10774		0.442704	2.36707		0.476758	1.63246		0.008514	0.029151		0	0.05184		1.05153	6.169		8.67508	8.19077		2.83912	4.19907		0.105152	0.05184
0.065779	0.032492		0.830456	0.796058		1.52935	2.16614		1.62802	0.833965		0.197336	0.064984		0.035486	0.065359		3.3357	5.19608		4.47126	4.01961		1.66785	2.2549		0.177431	0.065359
0.136203	0.028523		0.435849	2.39589		1.33479	3.28009		1.60719	2.39589		0.027241	3.28009		0	0		0.780379	4.16667		1.08696	3.76068		1.47715	2.47863		0	0.042735
0.129478	0.196773		0.237376	1.57418		0.647389	1.94805		2.41692	4.13223		0	0.039355		0.044248	0.062709		0.331858	1.42141		1.0177	1.58863		2.23451	2.46656		0.022124	0.062709
0.187676	0.16021		1.59525	1.26711		1.31373	0.640839		2.40851	1.98077		0	0.043694		0	0		2.30089	5.4846		2.56637	3.30579		2.56637	2.35341		0	0.075131
0.131199	0.067935		0.629756	0.951087		0.970874	1.74932		1.70559	4.72147		0.02624	0.101902		0.081169	0.044944		0	2.92135		0	5.4382		0	7.14025		0	0.044944
	Average ± SD			Average ± SD			Average ± SD			Average ± SD			Average ± SD			Average ± SD			Average ± SD			Average ± SD			Average ± SD			Average ± SD
WT→WT (n = 6)	0.1126 ± 0.05761		WT→WT (n = 6)	0.6314 ± 0.5457		WT→WT (n = 6)	1.040 ± 0.4282		WT→WT (n = 6)	1.707 ± 0.7107		WT→WT (n = 6)	0.04322 ± 0.07647		WT→WT (n = 6)	0.02682 ± 0.03314		WT→WT (n = 6)	1.300 ± 1.273		WT→WT (n = 6)	2.970 ± 3.198		WT→WT (n = 6)	1.797 ± 1.022		WT→WT (n = 6)	0.05078 ± 0.07423
WT→KO (n = 6)	0.08585 ± 0.07417		WT→KO (n = 6)	1.349 ± 0.5789		WT→KO (n = 6)	2.025 ± 0.8614		WT→KO (n = 6)	2.616 ± 1.505		WT→KO (n = 6)	0.5932 ± 1.317		WT→KO (n = 6)	0.03748 ± 0.02995		WT→KO (n = 6)	4.227 ± 1.782		WT→KO (n = 6)	4.384 ± 2.241		WT→KO (n = 6)	3.482 ± 1.935		WT→KO (n = 6)	0.05712 ± 0.01270
	p value			p value			p value			p value			p value			p value			p value			p value			p value			p value
	p = 0.8182			p = 0.0649			*p = 0.0411			p = 0.3939			*p = 0.0390			p = 0.4697			*p = 0.0152			p = 0.3095			p = 0.1320			p = 0.3874
