# Supplementary material for: Downregulation of semaphorin 4A in keratinocytes reflects the features of non-lesional psoriasis
Source: eLife. 2024 Dec 31;13:RP97654. doi: 10.7554/eLife.97654 (PMC11687936; doi:10.7554/eLife.97654)
Supplement: Figure 4—figure supplement 1—source data 1. [file elife-97654-fig4-figsupp1-data1.xlsx]

## Sheet: Figure 4-figure supplement 1A
Mann-Whitney test
Epi																								Derm
Ccl20			S100a8			S100a9			Tnfα			Il23			Il17a			Ifnγ			Il4			Ccl20			S100a8			S100a9			Tnfα			Il23			Il17a			Ifnγ			Il4
WT	KO		WT	KO		WT	KO		WT	KO		WT	KO		WT	KO		WT	KO		WT	KO		WT	KO		WT	KO		WT	KO		WT	KO		WT	KO		WT	KO		WT	KO		WT	KO
0.558505	2.22795		1.36129	1.00581		1.69618	0.71948		0.709696	1.89981		0.955389	1.73888		0.611131	2.50343		0.999506	1.70951		0.774171	#		1.09074	1.04166		0.917314	1.02283		0.288673	0.14874		0.487361	0.67473		0.92234	0.996439		0.953315	1.57315		1.0083	1.14018		#	#
0.879966	1.0267		0.582897	1.46303		0.83413	0.806193		1.16721	1.84176		0.717382	1.77354		0.777899	2.44156		0.681896	1.60548		0.76082	1.83623		1.0713	1.52608		1.05247	0.987442		3.20603	1.50822		0.500938	1.18982		1.03941	1.14039		0.778322	1.54821		0.977387	1.04709		#	#
0.626007	2.94795		0.554152	2.65397		0.396323	1.68868		0.872817	1.88191		1.02371	0.468087		#	2.55395		0.843355	0.264532		#	0.849174		0.235981	#		0.90377	1.05799		0.354088	0.194186		1.31554	0.145432		0.895594	1.19497		0.950959	#		0.836655	1.2126		#	#
1.4391	1.72687		1.51695	7.109		1.28776	3.72133		1.22469	1.35255		1.32269	1.46675		1.20751	9.61098		1.28115	1.27054		1.46501	1.37149		1.71474	2.83643		1.01079	0.846203		1.06436	1.15122		0.826139	1.09364		0.971705	1.17645		#	#		0.992817	1.0693		#	#
1.49643	1.74934		0.98471	7.74962		0.785609	5.377		1.02558	1.75476		0.980822	0.324997		1.40345	6.25353		1.19409	0.208334		#	#		0.887244	0.149607		1.11566	0.995801		0.086845	0.051196		1.87003	0.144178		1.17095	1.35331		1.3174	0.987154		1.18484	1.20718		#	#
	Average ± SD			Average ± SD			Average ± SD			Average ± SD			Average ± SD			Average ± SD			Average ± SD			Average ± SD			Average ± SD			Average ± SD			Average ± SD			Average ± SD			Average ± SD			Average ± SD			Average ± SD			Average ± SD
WT (n = 5)	1.000 ± 0.444		WT (n = 5)	1.000 ± 0.4390		WT (n = 5)	1.000 ± 0.5013		WT (n = 5)	1.000 ± 0.2119		WT (n = 5)	1.000 ± 0.2162		WT (n = 5)	1.000 ± 0.3681		WT (n = 5)	1.000 ± 0.2462		WT (n = 5)	1.000 ± 0.4028		WT (n = 5)	1.000 ± 0.5293		WT (n = 5)	1.000 ± 0.08992		WT (n = 5)	1.000 ± 1.287		WT (n = 5)	1.000 ± 0.5913		WT (n = 5)	1.000 ± 0.1101		WT (n = 5)	1.000 ± 0.2269		WT (n = 5)	1.000 ± 0.1240		WT (n = 5)	not detected
KO (n = 5)	1.936 ± 0.7097		KO (n = 5)	3.996 ± 3.199		KO (n = 5)	2.463 ± 2.029		KO (n = 5)	1.746 ± 0.227		KO (n = 5)	1.154 ± 0.7038		KO (n = 5)	4673 ± 3204		KO (n = 5)	1.012 ± 0.7263		KO (n = 5)	1.352 ± 0.4938		KO (n = 5)	1.388 ± 1.121		KO (n = 5)	0.9821 ± 0.08078		KO (n = 5)	0.6107 ± 0.6704		KO (n = 5)	0.6496 ± 0.4998		KO (n = 5)	1.172 ± 0.1277		KO (n = 5)	1.370 ± 0.3314		KO (n = 5)	1.135 ± 0.07633		KO (n = 5)	not detected
	p value			p value			p value			p value			p value			p value			p value			p value			p value			p value			p value			p value			p value			p value			p value
	*p = 0.0317			p = 0.0556			p = 0.4206			**p = 0.0079			p = 0.6905			*p = 0.0159			p = 0.8413			p = 0.4000			p = 0.9048			p = 0.8413			p = 0.6905			p = 0.4206			p = 0.0556			p = 0.1143			p = 0.0556

## Sheet: Figure 4-figure supplement 1B
Mann-Whitney test
#/ear									# CD69+CD103+/ear
γδ			CD4			CD8			γδ			CD4			CD8
WT	KO		WT	KO		WT	KO		WT	KO		WT	KO		WT	KO
551	902		47	43		11	17		459	803		30	23		2	5
718	1370		76	141		24	20		558	1222		26	113		1	9
760	1873		46	105		25	58		695	1783		18	124		1	18
798	1767		74	171		23	50		746	1697		42	92		3	12
259	987		97	137		22	23		213	932		18	88		1	13
556	568		102	53		25	8		501	552		40	35		9	3
442	1068		75	244		11	29		418	1025		45	131		4	8
	Average ± SD			Average ± SD			Average ± SD			Average ± SD			Average ± SD			Average ± SD
WT (n = 7)	583.4 ± 192.5		WT (n = 7)	73.86 ± 21.72		WT (n = 7)	20.14 ± 6.336		WT (n = 7)	512.9 ± 178.7		WT (n = 7)	31.29 ± 11.27		WT (n = 7)	3.000 ± 2.887
KO (n = 7)	1219 ± 474.6		KO (n = 7)	127.7 ± 69.44		KO (n = 7)	29.29 ± 18.18		KO (n = 7)	1145 ± 445.7		KO (n = 7)	86.57 ± 42.44		KO (n = 7)	9.714 ± 5.090
	p value			p value			p value			p value			p value			p value
	**p = 0.0041			p = 0.1282			p = 0.6451			**p = 0.0041			*p = 0.0367			*p = 0.0105
