# Supplementary material for: Downregulation of semaphorin 4A in keratinocytes reflects the features of non-lesional psoriasis
Source: eLife. 2024 Dec 31;13:RP97654. doi: 10.7554/eLife.97654 (PMC11687936; doi:10.7554/eLife.97654)
Supplement: Figure 4—figure supplement 2—source data 1. [file elife-97654-fig4-figsupp2-data1.xlsx]

## Sheet: Figure 4-figure supplement 2A
Mann-Whitney test
Epi															Derm
Vγ3			Vγ2			DNγδ			CD4			CD8			Vγ3			Vγ2			DNγδ			CD4			CD8
WT	KO		WT	KO		WT	KO		WT	KO		WT	KO		WT	KO		WT	KO		WT	KO		WT	KO		WT	KO
96.4008	64.9286		0.67043	13.0975		1.65843	18.0323		0.247001	0.18622		0.211715	1.2725		46.3158	14.9373		8	11.8586		21.2632	36.7161		3.36842	2.7366		4.94737	7.18358
95.0669	57.492		1.20703	15.7279		3.25374	23.4502		0.288638	1.98371		0.131199	0.885583		47.1523	19.1271		14.4371	45.6996		32.7152	55.8408		2.78146	3.46598		0.397351	0.898588
56.6695	60.8016		0.403472	16.349		4.84167	31.2561		0.122264	3.17693		1.0637	3.05474		13.2281	5.66683		1.84211	5.30858		10.0702	20.4364		0.719298	2.27976		2	2.10064
93.5037	92.3695		1.17146	1.38513		1.78914	2.72928		2.08733	1.99164		0.319489	0.245881		48.8038	42.522		8.13397	12.434		12.3445	22.8739		17.4163	14.3109		4.11483	1.40762
91.3487	79.1142		2.01902	2.94143		3.89717	8.89189		1.74903	6.59285		0.622139	1.36083		24.6711	16.5624		24.8355	26.0213		31.9079	41.2219		15.625	11.9617		1.23355	2.0979
93.5858	79.9679		1.46156	4.1901		3.14444	9.01159		1.11079	5.55619		0.484403	0.631386		17.7163	40.5492		25.0147	16.8858		37.4926	28.8051		16.8923	10.6632		0.94173	1.05171
70.2838	60.5312		3.06066	1.25		8.95938	8.9375		11.9087	16.75		0.723428	1.71875		16.0683	8.82538		9.49165	5.06409		18.77	15.0662		37.149	46.2072		1.77746	1.51292
56.5784	71.7277		1.43691	1.46597		7.27436	6.56195		20.6331	13.1414		0.875617	1.36126		3.92907	3.94592		5.77191	7.11921		13.3171	22.8753		34.3533	44.6744		1.59944	1.46247
	Average ± SD			Average ± SD			Average ± SD			Average ± SD			Average ± SD			Average ± SD			Average ± SD			Average ± SD			Average ± SD			Average ± SD
WT (n = 8)	81.68 ± 17.55		WT (n = 8)	1.429 ± 0.8241		WT (n = 8)	4.352 ± 2.583		WT (n = 8)	4.768 ± 7.507		WT (n = 8)	0.5540 ± 0.3278		WT (n = 8)	27.24 ± 17.68		WT (n = 8)	12.19 ± 8.611		WT (n = 8)	22.24 ± 10.52		WT (n = 8)	16.04 ± 13.91		WT (n = 8)	2.126 ± 1.582
KO (n = 8)	70.87 ± 12.17		KO (n = 8)	7.051 ± 6.765		KO (n = 8)	13.61 ± 9.718		KO (n = 8)	6.172 ± 5.866		KO (n = 8)	1.316 ± 0.8443		KO (n = 8)	19.02 ± 14.87		KO (n = 8)	16.30 ± 13.76		KO (n = 8)	30.48 ± 13.39		KO (n = 8)	17.04 ± 18.11		KO (n = 8)	2.214 ± 2.053
	p value			p value			p value			p value			p value			p value			p value			p value			p value			p value
	p = 0.2786			*p = 0.0281			*p = 0.0207			p = 0.2786			*p = 0.0207			p = 0.3282			p = 0.7209			p = 0.1949			p = 0.8785			p > 0.9999

## Sheet: Figure 4-figure supplement 2B
Mann-Whitney test
Epi															Derm
Vγ3			Vγ2			DNγδ			CD4			CD8			Vγ3			Vγ2			DNγδ			CD4			CD8
WT	KO		WT	KO		WT	KO		WT	KO		WT	KO		WT	KO		WT	KO		WT	KO		WT	KO		WT	KO
0.69257	0.295833		0.0234769	0.0591666		0.0117385	0.101428		0.164339	0.524047		0.281723	0.439523		0	0.0736106		0	0.0736106		0.0822368	0.0736106		0.493421	0.257637		0.493421	0.257637
0.501107	0.195156		0.0709901	0.516588		0.0709901	0.0573987		0.037583	0.378831		0.167036	0.241075		0	0.0876424		0.0588582	0.0876424		0.0588582	0.0584283		0.64744	0.175285		0.64744	0.175285
0.66778	0.328125		0.111297	0		0.166945	0.078125		1.66945	0.921875		0.389538	0.515625		0.106648	0.0630385		0	0		0.106648	0		2.34625	1.4709		2.34625	1.4709
0.202066	0.331588		0	0		0.0673552	0.034904		0.808262	0.4363		0.314324	0.296684		0	0.0275938		0	0		0	0.110375		1.04312	1.21413		1.04312	1.21413
	Average ± SD			Average ± SD			Average ± SD			Average ± SD			Average ± SD			Average ± SD			Average ± SD			Average ± SD			Average ± SD			Average ± SD
WT (n = 4)	0.5159 ± 0.2258		WT (n = 4)	0.05144 ± 0.04964		WT (n = 4)	0.07926 ± 0.06444		WT (n = 4)	0.6699 ± 0.7469		WT (n = 4)	0.2882 ± 0.09251		WT (n = 4)	0.02666 ± 0.05332		WT (n = 4)	0.01471 ± 0.02943		WT (n = 4)	0.06194 ± 0.04567		WT (n = 4)	1.133 ± 0.8416		WT (n = 4)	1.133 ± 0.8416
KO (n = 4)	0.2877 ± 0.06375		KO (n = 4)	0.1439 ± 0.2500		KO (n = 4)	0.06796 ± 0.02845		KO (n = 4)	0.5653 ± 0.2451		KO (n = 4)	0.3732 ± 0.1265		KO (n = 4)	0.06297 ± 0.02565		KO (n = 4)	0.04031 ± 0.04690		KO (n = 4)	0.06060 ± 0.04591		KO (n = 4)	0.7795 ± 0.6594		KO (n = 4)	0.7795 ± 0.6594
	p value			p value			p value			p value			p value			p value			p value			p value			p value			p value
	p = 0.2000			p = 0.9143			p > 0.9999			p = 0.8857			p = 0.4857			p = 0.3143			p = 0.4286			p = 0.9714			p = 0.6857			p = 0.6857

## Sheet: Figure 4-figure supplement 2C
Mann-Whitney test
Epi															Derm
Vγ3			Vγ2			DNγδ			CD4			CD8			Vγ3			Vγ2			DNγδ			CD4			CD8
WT	KO		WT	KO		WT	KO		WT	KO		WT	KO		WT	KO		WT	KO		WT	KO		WT	KO		WT	KO
0.211292	0.126786		0.0586923	0.0169047		0.0234769	0.00845237		0	0		0	0		0	0		0	0		0	0.0736106		0	0		0	0
0.0793419	0.183676		0.00417589	0.126277		0.00417589	0.0229595		0	0		0	0		0	0.0584283		0	0.0584283		0	0.0876424		0	0		0	0
0.222593	0.046875		0.0556483	0.03125		0.445186	0		0	0.015625		0	0		0.0355492	0		0.391042	0		0.106648	0		0.0710985	0		0	0
0.0224517	0.017452		0.0673552	0.017452		0	0.034904		0	0		0	0		0	0		0.069541	0.110375		0.0347705	0.0551876		0	0		0	0
	Average ± SD			Average ± SD			Average ± SD			Average ± SD			Average ± SD			Average ± SD			Average ± SD			Average ± SD			Average ± SD			Average ± SD
WT (n = 4)	0.1339 ± 0.09875		WT (n = 4)	0.04647 ± 0.02863		WT (n = 4)	0.1182 ± 0.2182		WT (n = 4)	0.000 ± 0.000		WT (n = 4)	0.000 ± 0.000		WT (n = 4)	0.008887 ± 0.01777		WT (n = 4)	0.1151 ± 0.1868		WT (n = 4)	0.03535 ± 0.05028		WT (n = 4)	0.01777 ± 0.03555		WT (n = 4)	0.000 ± 0.000
KO (n = 4)	0.09370 ± 0.07571		KO (n = 4)	0.04797 ± 0.05262		KO (n = 4)	0.01658 ± 0.01546		KO (n = 4)	0.003906 ± 0.007813		KO (n = 4)	0.000 ± 0.000		KO (n = 4)	0.01461 ± 0.02921		KO (n = 4)	0.04220 ± 0.05314		KO (n = 4)	0.05411 ± 0.3844		KO (n = 4)	0.000 ± 0.000		KO (n = 4)	0.000 ± 0.000
	p value			p value			p value			p value			p value			p value			p value			p value			p value			p value
	p = 0.4857			p = 0.8857			p = 0.9714			p > 0.9999			p > 0.9999			p > 0.9999			p = 0.8286			p = 0.6571			p > 0.9999			p > 0.9999
