# Supplementary material for: Downregulation of semaphorin 4A in keratinocytes reflects the features of non-lesional psoriasis
Source: eLife. 2024 Dec 31;13:RP97654. doi: 10.7554/eLife.97654 (PMC11687936; doi:10.7554/eLife.97654)
Supplement: Figure 4—figure supplement 3—source data 1. [file elife-97654-fig4-figsupp3-data1.xlsx]

## Sheet: Figure 4-figure supplement 3
Mann-Whitney test
IL-17A production																											IFNγ production
IL-23 dependent									IL-23 only									IL-23 independent									IL-23 dependent									IL-23 only									IL-23 independent
γδ			CD4			CD8			γδ			CD4			CD8			γδ			CD4			CD8			γδ			CD4			CD8			γδ			CD4			CD8			γδ			CD4
WT	KO		WT	KO		WT	KO		WT	KO		WT	KO		WT	KO		WT	KO		WT	KO		WT	KO		WT	KO		WT	KO		WT	KO		WT	KO		WT	KO		WT	KO		WT	KO		WT	KO
11.6921	1.16565		2.56327	1.29646		0.531709	3.17051		0.61116	2.26697		4.51069	0.934332		0.425982	0.5241		0.0325	0.0325		6.35299	3.59649		5.44011	6.61063		1.4398	1.04306		5.33633	3.24945		1.27662	11.1216		0	0.755532		5.42479	5.29719		0.7912	2.91014		0.065	0		2.90167	1.79825
5.98511	8.87279		2.16891	0.506481		1.41121	0.883518		3.16894	1.39125		3.31685	3.4084		0	0.212921		0.310608	0		16.921	1.2669		8.30238	7.93797		3.74015	2.97446		3.13288	3.67646		4.01735	2.26463		0.905364	0.53		9.50012	7.44919		1.35594	0.425693		0.197664	0		1.69969	2.5338
6.75119	3.86651		2.24833	0.666119		0.644527	2.28676		1.69	2.59911		3.22163	2.38169		0	0.463485		0.043342	0.61875		18.368	11.6033		4.2498	2.71649		1.25375	1.75763		4.18439	2.75232		2.90153	3.32036		0	0.678		9.35312	5.82926		0.152381	1.12507		0.043342	0.12375		1.97611	7.65326
9.2354	5.38183		1.24313	0.162169		0.850918	0.999094		14.1654	28.9911		1.94804	2.71522		0.211508	0.0749681		0.608828	0.409959		1.21362	1.7696		5.77384	4.85963		1.96268	1.04813		4.21701	3.22127		4.86082	1.69123		0.756378	1.44821		4.972	5.54203		0.423017	1.35019		0	0		2.73517	2.43033
13.3475	4.11485		1.50822	2.92454		0.738633	0.412136		3.62379	2.60629		8.58317	2.02991		0.762562	2.07102		0.480018	2.16		5.94068	0.144243		7.26108	3.74896		2.87323	0.838009		3.94013	8.78213		5.11725	0.412136		0	0.200568		4.23034	9.2719		2.19245	1.93728		0	0.144		1.26069	1.43936
2.37783	5.10793		1.12939	5.17088		0.0911916	2.15794		9.00081	2.48		3.61986	6.14358		0.4187	0.0690364		0.300024	0.14285		2.89071	1.3443		5.84513	8.5646		0.704613	1.30963		3.30326	4.00596		0.365168	3.91769		0.209124	0.206584		10.7115	5.31832		1.98985	0.0690364		0	0		4.93854	0.918939
2.60042	3.17018		2.42526	1.67738		0.765747	0.290767		1.80278	3.64575		13.0584	9.28578		1.69523	0.3123											1.13544	0.90958		5.43794	5.57289		1.74046	1.66318		0.183885	0		3.90369	5.5504		2.06421	1.14519
2.37411			3.58508	3.69045		0.317973						22.3056	5.78723														0.51219			6.18085	4.85178		0.437047						2.72236	3.92856
												8.22523	7.81546																										6.01711	6.40776
	Average ± SD			Average ± SD			Average ± SD			Average ± SD			Average ± SD			Average ± SD			Average ± SD			Average ± SD			Average ± SD			Average ± SD		WT (n = 8)	4.467 ± 1.082		WT (n = 8)	2.590 ± 1.916		WT (n = 7)	0.2935 ± 0.3800		WT (n = 9)	6.315 ± 2.838		WT (n = 7)	1.281 ± 0.8369		WT (n = 6)	0.05100 ± 0.07690		WT (n = 6)	2.585 ± 1.309
WT (n = 8)	6.795 ± 4.312		WT (n = 8)	2.109 ± 0.8087		WT (n = 8)	0.6690 ± 0.3918		WT (n = 7)	4.866 ± 4.926		WT (n = 9)	7.643 ± 6.541		WT (n = 7)	0.5020 ± 0.5906		WT (n = 6)	0.2959 ± 0.2303		WT (n = 6)	8.615 ± 7.265		WT (n = 6)	6.145 ± 1.429		WT (n = 8)	1.703 ± 1.108		KO (n = 8)	4.514 ± 1.956		KO (n = 7)	3.484 ± 3.559		KO (n = 7)	0.5456 ± 0.4845		KO (n = 9)	6.066 ± 1.526		KO (n = 7)	1.280 ± 0.9428		KO (n = 6)	0.04463 ± 0.06943		KO (n = 6)	2.796 ± 2.456
KO (n = 7)	4.526 ± 2.370		KO (n = 8)	2.012 ± 0.1763		KO (n = 8)	1.457 ± 0.1088		KO (n = 7)	6.283 ± 10.04		KO (n = 9)	4.500 ± 2.871		KO (n = 7)	0.5325 ± 0.7008		KO (n = 6)	0.5607 ± 0.8188		KO (n = 6)	3.287 ± 4.226		KO (n = 6)	5.740 ± 2.343		KO (n = 7)	1.412 ± 0.7552
																															p value			p value			p value			p value			p value			p value			p value
	p value			p value			p value			p value			p value			p value			p value			p value			p value			p value			p = 0.6454			p = 0.9551			p = 0.3980			p = 0.8633			p = 0.8048			p = 0.8485			p = 0.6991
	p = 0.3969			p = 0.7209			p = 0.1520			p > 0.9999			p = 0.2973			p = 0.7727			p = 0.9740			p = 0.1797			p = 0.8182			p = 0.6943
