# Supplementary material for: Downregulation of semaphorin 4A in keratinocytes reflects the features of non-lesional psoriasis
Source: eLife. 2024 Dec 31;13:RP97654. doi: 10.7554/eLife.97654 (PMC11687936; doi:10.7554/eLife.97654)
Supplement: Figure 4—source data 1. [file elife-97654-fig4-data1.xlsx]

## Sheet: Figure 4A
Mann-Whitney test
WT	KO
0.17	0.175
0.165	0.18
0.17	0.17
0.165	0.18
0.17	0.175
0.155	0.17
0.165	0.165
0.16	0.17
0.165	0.17
0.155	0.175
0.16	0.175
0.16	0.18
0.165	0.19
0.155	0.18
0.165	0.19
	Average ± SD
WT (n = 15)	0.163 ± 0.005278
KO (n = 15)	0.1763 ± 0.007188
	p value
	****p < 0.0001

## Sheet: Figure 4B
Mann-Whitney test
Day0 Back						Wk8 Back						Wk8 Ear
Epi			Derm			Epi			Derm			Epi			Derm
WT	KO		WT	KO		WT	KO		WT	KO		WT	KO		WT	KO
38.3333	44		225	206.167		23	31.4		202.6	254.2		19.4	17.3		35	38.6
38.8333	33		240.833	207		22.1	29.6		240.9	201.9		9.8	20.4		43.3	41.3
43.8333	39.3333		245.5	260.167		26.1	26.4		191	212.2		13.4	17.4		54.2	28
36.1667	45.5		177.833	175.667		21	28.8		218.7	231.1		10.3	19.7		30.7	41
44.6667	38.6667		201	275.167		26.6	28.9		189.8	206.9		13.1	26.5		38.7	76
												14.2	22		38.4	58.5
												12.9	17.1		49.9	44.6
												12.8	14.3		40	42.3
	Average ± SD			Average ± SD			Average ± SD			Average ± SD			Average ± SD			Average ± SD
WT (n = 5)	40.37 ± 3.696		WT (n = 5)	218 ± 28.41		WT (n = 5)	23.76 ± 2.474		WT (n = 5)	208.6 ± 21.47		WT (n = 8)	13.24 ± 2.920		WT (n = 8)	41.28 ± 7.684
KO (n = 5)	40.10 ± 4.935		KO (n = 5)	224.8 ± 41.43		KO (n = 5)	29.02 ± 1.798		KO (n = 5)	221.3 ± 21.48		KO (n = 8)	19.34 ± 3.740		KO (n = 8)	46.29 ± 14.62
	p value			p value			p value			p value			p value			p value
	p = 0.8413			p = 0.8413			*p = 0.0159			p = 0.4206			**p = 0.0019			p = 0.4418

## Sheet: Figure 4C
Mann-Whitney test
Epi	Derm
0.889217	0.00462507
1.35374	0.00740067
0.995984	0.0291299
0.927522	0.00926371
0.833536	0.00994948
	Average ± SD
WT (n = 5)	1.000 ± 0.2064
KO (n = 5)	0.01207 ± 0.009755
	p value
	**p = 0.0079

## Sheet: Figure 4D
Mann-Whitney test
Epi															Derm
Vγ3			Vγ2			DNγδ			CD4			CD8			Vγ3			Vγ2			DNγδ			CD4			CD8
WT	KO		WT	KO		WT	KO		WT	KO		WT	KO		WT	KO		WT	KO		WT	KO		WT	KO		WT	KO
0.0352858	0.062073		0.0705716	2.11049		0.529287	1.52079		0	0.031037		0	0		0.315789	0.114025		4.31579	7.06956		14.1053	25.8837		0.315789	0.22805		0.421053	0.22805
0.0524797	0.283386		0.393597	1.23982		1.02335	4.49876		0.0524797	0.460503		0	0		0.264901	0		8.07947	8.4724		17.2185	35.3017		0.794702	0.385109		0	0.12837
0.0366793	0.097752		0.0489057	0.904203		0.122264	3.39687		0	1.2219		0.012226	0.244379		0	0.032568		0.929825	2.42631		1.68421	6.09021		0.035088	0.390816		0.0701754	0.146556
0.106496	0.073764		0.724175	1.14745		0.553781	1.98344		0.596379	0.860585		0.021299	0.073764		0.191388	0.058651		6.1244	9.61877		8.99522	20.2933		1.62679	2.9912		0.191388	0.117302
	Average ± SD			Average ± SD			Average ± SD			Average ± SD			Average ± SD			Average ± SD			Average ± SD			Average ± SD			Average ± SD			Average ± SD
WT (n = 4)	0.05774 ± 0.03343		WT (n = 4)	0.3093 ± 0.3183		WT (n = 4)	0.5572 ± 0.3684		WT (n = 4)	0.1622 ± 0.2905		WT (n = 4)	0.008381 ± 0.01036		WT (n = 4)	0.1930 ± 0.1384		WT (n = 4)	4.862 ± 3.039		WT (n = 4)	10.50 ± 6.785		WT (n = 4)	0.6931 ± 0.6970		WT (n = 4)	0.1707 ± 0.1847
KO (n = 4)	0.1292 ± 0.1038		KO (n = 4)	1.350 ± 0.5261		KO (n = 4)	2.850 ± 1.358		KO (n = 4)	0.6435 ± 0.5132		KO (n = 4)	0.07954 ± 0.1153		KO (n = 4)	0.05131 ± 0.04820		KO (n = 4)	6.897 ± 3.157		KO (n = 4)	21.89 ± 12.22		KO (n = 4)	0.9988 ± 1.330		KO (n = 4)	0.1551 ± 0.05013
	p value			p value			p value			p value			p value			p value			p value			p value			p value			p value
	p = 0.2000			*p = 0.0286			*p = 0.0286			p = 0.1714			p = 0.6571			p = 0.2286			p = 0.3429			p = 0.2000			p = 0.8857			p = 0.8857

## Sheet: Figure 4E
Mann-Whitney test
γδ			CD4			CD8
WT	KO		WT	KO		WT	KO
0.409795	0.244113		0.51974	0.352845		0.217391	0.143909
0.377369	0.150845		0.372053	0.366174		0.220575	0.222238
0.32749	0.535688		0.0317335	0.122932		0.0114241	0.0193712
0.449818	1.60166		0.0881306	0.298755		0.00493531	0.0165975
0.126805	0.336236		0.0185569	0.0303164		0.00618563	0.00275604
0.151811	0.155929		0.0497874	0.123647		0.00897805	0.012182
	Average ± SD			Average ± SD			Average ± SD
WT (n = 6)	0.3072 ± 0.1363		WT (n = 6)	0.1800 ± 0.2125		WT (n = 6)	0.07825 ± 0.1090
KO (n = 6)	0.5041 ± 0.5563		KO (n = 6)	0.2158 ± 0.1413		KO (n = 6)	0.06951 ± 0.09156
	p value			p value			p value
	p = 0.8182			p = 0.6991			p = 0.5887
