# Supplementary material for: Downregulation of semaphorin 4A in keratinocytes reflects the features of non-lesional psoriasis
Source: eLife. 2024 Dec 31;13:RP97654. doi: 10.7554/eLife.97654 (PMC11687936; doi:10.7554/eLife.97654)
Supplement: Figure 5—figure supplement 1—source data 1. [file elife-97654-fig5-figsupp1-data1.xlsx]

## Sheet: Figure 5-figure supplement 1
Mann-Whitney test
Ctl	NL
130.2	152.579
56	99.5984
64	96.1786
74.8	171
39	121.8
63.2	156
48	141.6
86.2	160.848
40.8062	85.8672
52.9052	107.337
	Average ± SD
Ctl (n = 10)	65.51 ± 27.03
NL (n = 10)	129.3 ± 30.81
	p value
	***p = 0.0003
