# Supplementary material for: Downregulation of semaphorin 4A in keratinocytes reflects the features of non-lesional psoriasis
Source: eLife. 2024 Dec 31;13:RP97654. doi: 10.7554/eLife.97654 (PMC11687936; doi:10.7554/eLife.97654)
Supplement: Figure 5—figure supplement 2—source data 1. [file elife-97654-fig5-figsupp2-data1.xlsx]

## Sheet: Figure 5-figure supplement 2
Mann-Whitney test
#Krt5			#Krt10			#Krt14			#Krt16
WT	KO		WT	KO		WT	KO		WT	KO
21.7	25.7		17.3333	19.3333		23.3333	27.3333		28.33	26.67
26	24.7		20.6667	18.3333		27	26.6667		26	26.33
23.3	24.3		15.6667	18.6667		27	22.6667		26	25
22	23.3		16	16		28	33.3333		23	25.67
21	28		15.3333	18		30.3333	20.3333		28.33	30
	Average ± SD			Average ± SD			Average ± SD			Average ± SD
WT (n = 5)	22.80 ± 1.974		WT (n = 5)	17.00 ± 2.186		WT (n = 5)	27.13 ± 2.523		WT (n = 5)	26.33 ± 2.197
KO (n = 5)	25.20 ± 1.786		KO (n = 5)	18.07 ± 1.256		KO (n = 5)	26.07 ± 4.980		KO (n = 5)	26.73 ± 1.935
	p value			p value			p value			p value
	p = 0.1032			p = 0.2460			p = 0.5236			p = 0.9841
