# Supplementary material for: Downregulation of semaphorin 4A in keratinocytes reflects the features of non-lesional psoriasis
Source: eLife. 2024 Dec 31;13:RP97654. doi: 10.7554/eLife.97654 (PMC11687936; doi:10.7554/eLife.97654)
Supplement: Figure 5—source data 1. [file elife-97654-fig5-data1.xlsx]

## Sheet: Figure 5A
Analyzed by RaNA-seq
	log2 FC	-log10 padj
SPRR2F	4.98723	21.4748
SERPINB4	4.82136	15.9763
DEFB4B	5.69252	14.5765
DEFB4B	6.01201	14.5765
S100A7A	4.22459	13.9203
CXCL8	2.48408	13.6653
PI3	3.99433	12.7611
SPRR2A	4.61114	12.6705
BRD2	-0.25368	11.9279
TCN1	3.11076	11.4704
TMPRSS11D	1.66658	10.5488
S100A8	3.84569	10.444
S100A9	3.78407	9.74793
SPRR2B	3.72124	9.41745
S100A7	3.47587	9.08057
HEPHL1	2.45919	9.07871
RHCG	2.69119	9.05907
AKR1B10	2.05441	8.94033
SERPINB3	2.49402	8.93474
IL36G	1.55294	8.86823
DEFB103B	2.375	8.45637
IL36A	2.35951	7.78102
SPRR2D	2.44202	7.64753
LCE3E	2.36712	7.64753
IGDCC4	-0.69871	7.42198
S100A12	2.80877	6.8996
LMO3	-4.21125	6.88181
SLC6A14	1.57331	6.66593
NOS2	0.669675	6.42423
DEFB4A	4.76614	6.34305
GDA	1.19444	6.23874
LCE3D	2.09003	6.18818
LILRB1	-2.72024	6.11376
LCN2	2.0474	5.88968
IFI27	2.34329	5.84329
FABP5	0.897476	5.75919
PRSS3	0.538613	5.60553
MDFI	0.756054	5.54761
MSI1	-1.06308	5.51235
LCE3A	3.33721	5.50061
NFIB	-0.44542	5.50061
MTHFD2P1	-2.80881	5.39202
SLURP2	0.692586	5.24203
AL512378.1	-1.41507	5.01233
IL5RA	-0.67948	4.99509
RPS3AP46	-2.97808	4.93738
C10orf99	1.36745	4.83474
KIAA1024L	-2.34149	4.73573
GJB2	1.37796	4.70106
GCM1	-1.75724	4.69821
DPPA4	-2.63627	4.69795
OPRK1	-0.55557	4.66415
CXCR2	0.521584	4.66415
PSG2	-2.42637	4.59401
CCBE1	-2.30441	4.56991
APOL1	0.910864	4.52257
TBR1	-0.66975	4.50751
CDH4	-1.04917	4.50751
ADAMTS18	-0.62018	4.50751
GDPD3	0.535933	4.48987
PRSS12	0.324614	4.48951
ANKS1B	-1.61481	4.48951
FHOD3	-0.60182	4.48951
CD274	0.590945	4.47635
DWORF	-2.56172	4.47604
PAX5	-0.27609	4.4741
SERTM1	-0.62269	4.46555
TREX2	0.602029	4.44973
DEFB4B	3.02101	4.38483
GRM3	-0.83363	4.37911
CXCL9	2.01023	4.37911
SPRR2G	1.95326	4.32845
GPR35	-1.29919	4.31915
CHRNA9	0.755861	4.30026
CDH4	-1.72705	4.30026
NFIC	-0.51762	4.30026
ZBED3	-0.42595	4.29343
NIFKP4	-1.88774	4.25107
S100A2	0.652405	4.17165
UBTFL11	-0.74016	4.15774
CHAC1	0.983456	4.15662
NEFL	0.602987	4.15662
H2AFJ	0.311092	4.15662
OCIAD2	0.443535	4.15662
BGN	-0.70849	4.14818
AL591499.1	-0.82237	4.14818
PCDH17	-0.57809	4.14319
FO681491.1	-0.93444	4.11004
ANKS4B	-0.85981	4.11004
AL731733.1	-0.73694	4.09003
AL845552.1	-1.52238	4.08461
ADAMDEC1	0.398172	4.06667
AC063947.2	-1.12993	4.06667
SLC22A9	-1.38536	4.05341
ELAVL3	-1.10671	4.01745
SLITRK5	-0.73407	4.00682
HNF1B	-0.38872	4.00682
HNF1B	-0.39483	3.98023
CRB1	-0.56253	3.98023
NFKBIL1	-1.37092	3.93846
PLA2G4D	0.863928	3.88812
GSTT4	-1.48691	3.88812
CLSTN2	-0.49559	3.88151
BATF2	0.391138	3.88023
UFD1	0.181337	3.8772
FABP5P3	-1.38712	3.86943
PRRG3	-2.78037	3.84607
MEGF8	-0.36808	3.84586
ARPC2	0.158253	3.84097
PPIAL4G	-1.15461	3.83042
GRIA4	-1.18964	3.83042
IFI6	1.80015	3.82872
NT5C3A	0.367525	3.8095
OR9Q1	-0.70651	3.80523
ZNF66	-2.05405	3.79857
TCEAL9	0.417156	3.79675
CCR12P	-0.56126	3.79053
RBM20	-1.44413	3.78515
OR8B5P	-1.06965	3.77443
AL589935.2	-0.60456	3.76267
AC004696.1	-0.73515	3.75474
SRGAP1	-0.89893	3.72139
NFKBIZ	0.283325	3.71316
RHD	-1.08375	3.71316
CBFA2T2	-0.35647	3.71316
SPRR2E	1.27662	3.70027
GALNT6	0.496485	3.69213
PLK2	0.3114	3.65259
LPAR4	-2.49048	3.64579
SRGN	0.57677	3.62749
PLBD1	0.340702	3.61995
CHST5	-1.83337	3.61856
NUGGC	-0.42712	3.61842
RIPPLY3	-1.00875	3.60731
SYT14	-1.42268	3.60386
EPGN	0.991029	3.60379
LRTM1	-3.21773	3.58381
RNF150	-1.53582	3.57493
ANO5	-0.2299	3.57493
MYADM	-1.07873	3.57493
CELF4	-2.39325	3.54611
DNAJC7	0.0863	3.54611
TTLL5	-2.28636	3.54449
RABGGTA	0.165398	3.53832
RTP4	0.727858	3.53687
CNR2	-0.73147	3.53687
UNC5C	-0.25542	3.52064
AL731556.2	-1.08969	3.50077
WDR1	0.131744	3.50077
RNASE7	0.54962	3.47369
NPAS3	-0.4795	3.4662
IFI44	1.22737	3.45184
CCDC141	-1.67098	3.44483
NCAM1	-1.58448	3.43872
PLD5	-1.10821	3.4131
RPSAP48	-2.35804	3.4077
IL20	0.431337	3.39385
ARID1B	-0.44019	3.39119
EFNA5	-0.52134	3.39089
CFAP45	0.544207	3.39089
HERC6	1.02636	3.38099
NFATC2	-0.36563	3.37378
CCR4	-0.86919	3.37267
TMEM45A	0.267063	3.37044
CCNB3P1	-0.79017	3.36751
IL36RN	0.448723	3.35639
RAB31	0.467972	3.35621
C1orf61	-1.64267	3.35621
CNTN4	-0.74811	3.33239
PLA2G4C	-0.70888	3.33181
OASL	1.10129	3.32253
ADRB1	-1.19752	3.31025
WIPF3	-0.27693	3.30335
GBP1	0.620637	3.29051
CPEB1	-1.51108	3.27743
MCOLN3	-0.5944	3.27743
APOBEC3D	-2.79481	3.27743
WDR53	0.217487	3.26098
BMP3	-0.58708	3.26098
KLK13	0.709204	3.25611
KLLN	-2.3465	3.25611
MYL12A	0.226941	3.25611
FABP5P7	0.851528	3.25611
CLEC7A	0.856457	3.25591
ENOX1	-2.03135	3.25365
TPP1	-0.27882	3.23678
PPP4R1	0.098029	3.23237
GPRC5A	-0.34085	3.22824
SULT1A1	-1.26544	3.22824
KIAA1210	-0.66149	3.22824
HOXA5	-0.98629	3.22388
SDCBP2	0.326103	3.21622
POMP	0.252723	3.21585
PCDHB1	-1.10946	3.21244
PELI2	-0.43293	3.21113
AC011473.4	0.795018	3.21012
PPM1N	-3.30589	3.21012
NOVA1	-1.28214	3.21012
BPGM	0.218839	3.20286
SCUBE1	-1.50646	3.19585
IFI16	0.303661	3.1891
TMEM45B	0.423031	3.1891
NOVA2	-0.24996	3.18154
ST3GAL5	-0.49645	3.16518
GZMB	0.539982	3.1618
SOX11	-0.80948	3.1618
HAL	0.410171	3.16177
USP27X	-1.17301	3.16177
CDR1	-1.00271	3.16177
COMP	1.4684	3.1596
WNT5B	-0.52291	3.15352
IFI30	0.422649	3.15352
ZNF221	-0.37806	3.15007
GLRX3	0.111183	3.1396
WFDC12	0.715163	3.13483
AC244636.2	-2.7942	3.12811
SHISA9	-0.74205	3.12716
GPR85	-2.55521	3.125
FIGN	-0.32733	3.11886
CTSB	0.259622	3.11886
AP002001.1	-0.47335	3.11225
INSR	-0.26183	3.1064
FOXB1	-0.57788	3.09705
CILP	1.06886	3.09527
MRPL47	0.196017	3.08152
SSTR2	-0.33212	3.08104
ZNF285	-0.46798	3.08104
MAGI2	-1.08643	3.06847
C16orf54	-0.77352	3.0579
AL359976.1	-2.42173	3.05606
OTX1	-0.24519	3.04314
PGK1	0.186033	3.04188
CNFN	0.476745	3.04188
NFIX	-0.38844	3.04188
KSR2	-0.14096	3.04188
RASL10B	-0.59796	3.04188
SIK2	-0.21441	3.04188
PRRT2	-1.4742	3.04188
IL1RAPL1	-0.29784	3.03601
HRAS	0.232607	3.03601
PHLPP1	-0.35634	3.03601
PKM	0.170841	3.03261
LMO1	0.298796	3.03023
PARP9	0.764895	3.02988
AC117529.2	-0.99603	3.02666
SPHK1	0.19783	3.02645
SHOX	-1.11026	3.02476
ZNF280B	-1.48601	3.02115
PSMA5	0.195417	3.0172
VAMP2	-0.55682	3.01523
EIF3EP2	-0.4135	2.99863
PLA2G2F	0.390489	2.99464
MDGA2	-0.3768	2.9878
SEMA5A	-0.50116	2.97345
TMPRSS13	0.259134	2.97044
UCHL3	0.235522	2.96701
GADD45A	0.235744	2.95784
SALL2	-0.24787	2.95256
GDPGP1	-1.11405	2.95256
GLA	0.273195	2.94695
SARNP	0.144149	2.93253
RALB	0.183168	2.92132
SFRP4	-0.65881	2.91655
PSMA3	0.137993	2.91639
ZNF462	-0.93207	2.91517
ATP12A	1.41008	2.91517
PYGL	0.191018	2.90934
ABI2	-0.24253	2.905
KCNJ3	-3.01041	2.905
FAM110D	-0.96643	2.905
MSX1	-2.21465	2.905
ITM2A	0.71618	2.905
NDUFA4L2	0.418544	2.90247
NAALAD2	-0.37972	2.90247
MX1	0.708836	2.89807
BTBD16	0.408782	2.89542
LCTL	-0.49679	2.8932
SKI	-0.46017	2.89312
EYA1	-1.11575	2.89312
GAPDH	0.252571	2.89312
AC207056.1	-0.33729	2.89312
CYSRT1	0.341296	2.89312
S100P	0.812615	2.88746
CACNA1A	-1.25289	2.8868
ISG15	1.48423	2.88643
AC046144.1	-1.24002	2.8734
ZNF286B	-0.39953	2.85875
PSMA6	0.273369	2.85851
TRIM72	-1.65819	2.85661
PGBD4	-1.41044	2.85452
ZC3H12A	0.533814	2.85066
RGS20	0.373746	2.85066
LRCH3	-0.31135	2.84466
AC116553.1	-2.35013	2.8394
DCTD	0.181127	2.82773
KIAA1324	-0.72161	2.82256
ENPP7P8	-0.86263	2.82256
CASP5	0.393674	2.82256
ZNF542P	-0.30604	2.82211
FGF12	-0.701	2.82112
IFIT3	0.909537	2.81837
ADH6	-1.04636	2.81739
ALDH6A1	-0.66408	2.81552
AJAP1	0.277574	2.81237
RPLP0P2	-0.52218	2.80984
ATF7	-0.22332	2.79863
PBX1	-0.4495	2.79381
FAM174B	-0.20716	2.79317
HNRNPA1P54	-0.97397	2.79317
CSTA	0.376985	2.79317
TMEM8B	-0.2917	2.79271
EPSTI1	0.816741	2.79155
C10orf105	-0.12548	2.78965
DSG3	0.318114	2.78381
ADIPOR1	0.137222	2.77968
NEK5	-0.58113	2.77968
UPP1	0.806864	2.77968
KLHL33	-0.36995	2.77968
SLC10A1	-0.42175	2.77968
BCL9	-0.24555	2.76611
SHISA2	-0.77459	2.76238
ATF4	0.161951	2.75824
SSBP1	0.218036	2.75763
PEAK1	-0.32039	2.75763
DCC	-0.33961	2.75763
OAS2	1.02833	2.75763
PCSK9	0.407826	2.75763
RARB	-0.34899	2.75177
MYL6	0.200137	2.74757
SAMD9	0.616487	2.74685
ASXL2	-0.28156	2.74087
GJB6	0.680045	2.74087
FOLH1	0.144684	2.74087
AC092028.1	-1.48958	2.73935
SIX3	-1.44653	2.73935
SESN2	0.237083	2.73476
KRT16	1.72849	2.73476
IL18	0.264647	2.73109
NPM1P40	-3.11861	2.72978
AC003080.1	-0.48468	2.72855
PGAM1	0.21837	2.72839
FAT1	0.395339	2.72839
RERE	-0.31703	2.72839
ZNF660	-0.34434	2.72839
COL1A1	-1.10769	2.72839
KRT8	-3.42287	2.72839
R3HDM2	-0.36737	2.72839
RSAD2	0.98096	2.72622
PRDM6	-0.31057	2.72403
NDUFB4	0.258907	2.72403
AICDA	-0.52694	2.71567
IGF2R	-0.27147	2.71358
TYMP	1.02045	2.71253
RPL21P135	-0.69181	2.70888
MYO1B	0.262715	2.70888
LCE6A	0.498997	2.70458
WDR61	0.100751	2.70298
KATNAL1	-0.28027	2.70026
ZFAND2A	0.257417	2.69625
IGHA1	-1.80503	2.69625
OAS1	0.659795	2.69625
ALDOB	-0.21242	2.6962
PPARGC1A	-0.62466	2.6962
BEX3	0.234827	2.69216
KMT2A	-0.33469	2.69216
AL590426.1	-2.35027	2.69216
ZNF578	-0.59465	2.69216
FFAR2	-2.62468	2.68415
AC013268.4	0.267021	2.68373
POGZ	-0.43575	2.6791
ADH7	0.30171	2.67524
PLCE1	-0.57478	2.67485
REPS2	-0.40327	2.67478
MEIS2	-0.47908	2.67478
CNDP1	-0.35675	2.67062
ACACB	-0.47408	2.66824
BPIFB1	-0.38228	2.66709
PDGFA	-2.16843	2.66492
PRELID2	-0.51475	2.65887
HEPACAM	-0.68255	2.65599
FGF18	-1.06372	2.65543
SSC5D	-0.76064	2.65543
ATP5MF	0.234126	2.65028
GPR151	-0.2049	2.6497
AC092427.1	-0.70876	2.64902
TSPY26P	-0.30872	2.64301
MPHOSPH6	0.250878	2.63498
DUSP14	0.317748	2.63366
SLC22A25	-0.36947	2.63366
PSMC4	0.176164	2.63284
EFR3B	-1.82391	2.63262
PGF	0.450784	2.63262
SLC2A4	-0.45499	2.63262
PA2G4P6	-0.55473	2.63205
MS4A2	-1.00773	2.632
FGF8	-2.70072	2.632
TPD52L2	0.133905	2.632
H2AFY	0.093466	2.632
ABCA2	-0.21973	2.62692
POM121L9P	-0.26531	2.62594
PCSK5	-1.14585	2.62594
AGPAT4	-0.31443	2.62594
PSMD6	0.171298	2.62493
UBE2L6	0.498135	2.62462
ATP8A2	-0.2862	2.62398
CNN2	0.179906	2.6224
ICOSLG	-0.48965	2.62146
PSMB1	0.224666	2.61166
LRRC20	0.39045	2.61166
SPRR1A	1.02136	2.61166
IDH3B	0.159852	2.61166
VPS25	0.154119	2.60261
DNMT3A	-0.47197	2.60261
IRF9	0.420487	2.60191
GABBR2	-1.1211	2.60142
ARHGDIB	0.31201	2.60142
OR2C3	-0.74354	2.60142
ERC1	-0.3436	2.60073
NOTCH2	-0.28741	2.60073
CELF5	-0.97698	2.6006
PPP1R7	0.170247	2.59506
PTGIR	-1.85492	2.59139
ACP7	0.549855	2.58425
RBX1	0.189692	2.58425
CNKSR2	-0.61583	2.58425
AR	-0.48989	2.58425
SARS2	0.195204	2.58169
HRH2	0.493772	2.57392
HMGN1P14	-2.54679	2.57392
TMSB4X	0.256753	2.56914
TMPRSS11B	-0.44941	2.56576
TUBB6	0.194587	2.56576
MFHAS1	0.235138	2.56044
PSMB3	0.219431	2.56044
GABRD	-0.39861	2.56044
HHIP	-0.26381	2.5599
AC004945.1	-0.29473	2.5599
BRMS1	0.19072	2.55396
AC097493.5	-0.64576	2.54696
ARV1	0.154348	2.53855
SDC3	-1.71881	2.53851
RPRD2	-0.51645	2.53765
PPIF	0.232253	2.53573
MARCKSL1P2	-0.59094	2.5349
PSMB4	0.182769	2.53366
CNNM2	-0.13897	2.53147
NEUROD2	-2.78946	2.52917
MYO1E	0.124186	2.52608
HIP1	-0.29976	2.52469
MED8	0.148607	2.52213
OR10H5	-0.48834	2.52152
ASPA	-0.2964	2.51863
C6orf226	0.321872	2.51863
PSMC3	0.211396	2.51348
IGF1R	-0.35955	2.50451
AC114324.1	-1.84092	2.50451
IFNGR1	0.175866	2.50451
ARMCX4	-0.38456	2.50451
PLAG1	-0.3912	2.50451
NRXN3	-0.34008	2.49787
MRPS18C	0.200103	2.49787
GBA	0.218958	2.49787
PSMC1	0.181373	2.49787
STC1	-0.41613	2.49787
CHRNA7	-0.26718	2.49787
PDS5B	-0.39889	2.49326
SOX4	-0.47527	2.48636
DPPA2P4	-0.36016	2.46963
GADD45B	0.203551	2.46963
TMEM92	-0.24855	2.46963
EGR3	-0.33398	2.46963
MMP9	0.450554	2.46957
CACNG2	-0.38511	2.46593
NR3C2	-0.3794	2.45958
PDE11A	-0.43401	2.45848
ATP1B3	0.16215	2.45848
NPM3	0.268178	2.45575
SCNM1	0.129183	2.4536
SNX27	-0.26522	2.45316
NDRG4	0.177894	2.45193
SEC61G	0.264998	2.44923
DPP3	0.070061	2.44923
KCNK2	-0.68152	2.44923
RPGRIP1	-2.50882	2.44832
LYST	-0.34937	2.44816
CYSLTR1	-0.46164	2.44749
ATP5ME	0.240461	2.44603
POLB	0.219815	2.44169
C1QB	0.841151	2.43727
TPI1	0.208679	2.43431
IGHG2	-0.6042	2.42343
STAT1	0.598126	2.42093
MMACHC	-1.22257	2.4181
IGFBP5	-0.61476	2.41758
PLA2G3	0.355088	2.41393
B2M	0.42563	2.40693
FBXL2	-0.39552	2.40693
E2F5	-0.48386	2.40161
DMBX1	-0.27398	2.39974
PARP12	0.265463	2.39715
ZNF549	-0.2726	2.39713
ARG1	0.505787	2.39128
ZNF70	-0.62422	2.39019
ABI3BP	-0.65653	2.39019
CAMK2B	-2.39135	2.3901
TIGAR	0.255587	2.38942
AC004386.1	-2.53602	2.38942
TFAP2B	-0.31394	2.38936
SLITRK1	-0.10314	2.38936
BMPR1B	-1.68835	2.38692
SYT14P1	-0.386	2.38646
CHRM1	-0.37306	2.38624
AHCYL2	-0.27739	2.38541
DNAL1	-0.35765	2.37876
NDEL1	0.108058	2.37876
PROSER1	-0.5458	2.37772
FAM60DP	-2.25152	2.37655
NUP214	-0.4398	2.37608
KIAA1671	-0.31141	2.37608
PRELID1	0.17556	2.37608
BNC1	0.17644	2.37608
ZNF667	-0.40595	2.3727
ZNF688	-1.89276	2.3727
INVS	-0.28418	2.37056
ARID1A	-0.3446	2.36899
RNF148	-0.20569	2.36749
MXRA5	-0.54955	2.36581
LYPD4	-0.86823	2.36269
SLC2A3P2	-0.44508	2.36269
PIGR	-0.2071	2.3625
FXYD3	0.200144	2.3625
ZNF385B	-0.67668	2.34975
CPZ	-0.8411	2.34941
MOB2	0.140242	2.34852
MYL12B	0.179843	2.34775
CDON	-0.40508	2.34495
NDUFA4	0.168496	2.34391
GPS2	0.157151	2.34128
CASP4	0.188562	2.34128
IRAK2	0.2925	2.34128
UBTFL9	-2.33745	2.3411
LGI1	-0.73632	2.33378
SLIRP	0.195077	2.33378
SNRPF	0.232891	2.33378
MANF	0.132476	2.33049
PDAP1	0.166001	2.32983
NDUFA7	0.171063	2.3273
ISCU	0.097442	2.32529
AKTIP	0.168029	2.32245
PDCD6	0.08214	2.32187
RNF222	0.228191	2.31741
TTBK2	-0.16665	2.31392
SRSF9	0.100601	2.31392
AC243547.3	0.30826	2.31001
NAALADL2	-0.43753	2.3099
NOTCH3	-0.36711	2.30389
VSIG4	0.66604	2.3024
CD2BP2	0.084427	2.30217
TIAM2	-0.35557	2.30021
LYN	0.313605	2.29885
CBLB	-0.44034	2.29885
ARL10	-0.30077	2.29885
TUSC3	0.260197	2.29884
HMOX2	0.119581	2.29844
UBL5	0.230364	2.29606
WARS	0.259609	2.29325
MYOG	-2.01034	2.29146
TIAL1	-0.28239	2.28902
SURF2	0.211303	2.28902
COX6A1	0.202906	2.28902
AGBL2	-0.73614	2.28902
SOX12	-0.26263	2.28902
STC2	0.347211	2.28672
XYLT2	-1.85061	2.28343
AFAP1L2	0.243356	2.28343
EIF2B5	0.094391	2.28343
AL023280.1	-0.21666	2.27804
HIF3A	-1.11427	2.27785
RPAP1	-0.23741	2.27785
HEXB	0.161713	2.27785
BLK	-0.27156	2.27613
KRT6A	1.35932	2.27462
ZBED9	-1.54398	2.27462
AF131215.1	-0.72091	2.27447
AC125604.1	-1.49162	2.27409
COL19A1	-0.32954	2.27409
NDUFB10	0.169857	2.27395
RBM17	0.023632	2.27198
SBDS	0.166845	2.2674
TRIM67	-0.16515	2.26587
AK1	0.394666	2.26392
APOL3	0.323873	2.26048
PRR26	-0.28169	2.26048
AC104164.1	-0.53536	2.26048
NCF2	0.300623	2.26048
DDX3P1	-0.39447	2.25959
S100A14	0.22201	2.25824
IFITM1	0.546582	2.25824
NAPEPLD	-0.27716	2.25656
P2RY4	-0.45488	2.2536
SLAIN1	-0.45759	2.2536
CDYLP1	-1.64883	2.2536
SDF2	0.117229	2.25006
AC103988.1	-0.49109	2.24665
NREP	-0.35243	2.24665
TCF7L2	-0.47372	2.24665
LCLAT1	-0.34942	2.24571
MED12	-0.32421	2.24559
NMUR2	-0.17837	2.24263
SERPINB13	0.376169	2.24241
RAB30	-0.2415	2.23814
STEAP3	0.279551	2.23576
CREBBP	-0.26474	2.23553
NME1	0.254263	2.23404
BNC2	-0.33655	2.22609
LMX1B	-0.24434	2.22552
CFB	0.625485	2.22264
CRABP2	0.476052	2.22264
VCP	0.083967	2.22157
SPRR1B	0.868101	2.22157
BECN1	0.127823	2.21837
CCSER1	-0.41811	2.21837
C8orf59	0.201856	2.21523
CILP2	-0.26051	2.21523
AC006509.1	-3.35993	2.21523
GRIK1	-0.35466	2.21523
DBI	0.272722	2.21523
F5	-0.42325	2.21514
SCRG1	-0.42324	2.21514
C16orf91	0.165495	2.2151
MRPL52	0.078967	2.2151
CIAPIN1	0.106986	2.2151
SCLY	-0.36963	2.2151
UNC93A	0.423758	2.2151
KRT16P2	0.479167	2.2151
NOG	-0.93703	2.21228
ATP6V1G1	0.222871	2.21124
RAPH1	-0.44115	2.2073
NDUFB8	0.125618	2.19957
ZNF8	-0.23743	2.19957
SPEF2	-0.34667	2.19957
AKAP11	-0.25591	2.19572
PTAFR	0.347973	2.19396
CD3G	-1.2485	2.19396
AC131392.2	-0.55703	2.19217
ITPA	0.11801	2.18853
SFRP5	-0.26278	2.18853
IGHV4-39	-0.95384	2.18744
SOS1	-0.34588	2.1845
PNMA8C	-0.57041	2.18308
AHNAK	-0.20979	2.18276
ENO1	0.201262	2.17819
GNL2	0.073409	2.1766
LRRC4C	-2.74739	2.1766
AC073055.1	-0.85165	2.1766
METTL5	0.17756	2.17304
PSME2	0.295514	2.16735
HLA-V	0.278208	2.16656
FAM136A	0.085582	2.16577
SOST	0.210855	2.16577
CDH7	-0.16555	2.16222
CIB2	0.252716	2.16003
TGM3	0.353441	2.15979
EP400	-0.31823	2.15948
FCGR2A	0.144945	2.15948
ANKRD29	0.35564	2.15948
PNP	0.363728	2.15507
ANO1	-0.31879	2.15297
ARPC3	0.177955	2.15297
ST6GALNAC1	-0.06678	2.1489
NHLRC2	-0.29194	2.14709
NDUFA12	0.242271	2.14646
DBIL5P2	-0.43902	2.14646
MKRN5P	-0.49514	2.14646
ZNF969P	-0.36815	2.14517
SLX4IP	-0.70027	2.14494
ZBTB20	-0.53282	2.14462
HUWE1	-0.22788	2.14462
AP000781.2	0.363274	2.14195
TRIM22	0.350598	2.14195
KDM6B	-0.45806	2.14195
ALDH1A3	0.554426	2.14109
TRAPPC3	0.122731	2.14109
PSMC2	0.22025	2.14059
CD164L2	0.327429	2.1374
CCL3	0.514342	2.1361
RANGRF	0.241576	2.1361
BCDIN3D	-1.6149	2.1361
CA3	-0.40201	2.13604
DMXL1	-0.2295	2.13604
ZNF546	-0.28536	2.13471
ZHX2	-0.30008	2.13471
DAW1	-1.42023	2.13194
ZBTB25	-0.19823	2.13165
HMBOX1	-0.25438	2.13165
HSPD1P3	0.721815	2.13009
SAG	-0.34832	2.12798
ESR1	-0.66521	2.12798
GPHN	-0.27546	2.12798
CCL4	0.646358	2.12798
PTTG1	0.294132	2.12651
LRAT	-0.39041	2.12651
AL138694.1	-0.40562	2.12429
C10orf55	0.212673	2.12193
TNIP1	0.091836	2.12193
ABCG4	0.267139	2.12177
ALDOA	0.140873	2.12177
TNRC6C	-0.31139	2.12177
SOGA1	-0.31491	2.12142
ADGRB1	-0.57664	2.12033
PSMC6	0.134844	2.1202
GLT1D1	0.259848	2.11538
CRCT1	0.385859	2.11471
CXCL1	0.57729	2.11442
KMT2E	-0.26671	2.11426
BCL9L	-0.35008	2.11426
PDLIM1	0.16177	2.11426
GPATCH8	-0.23982	2.11426
ZNF695	-0.57773	2.11415
RFX3	-0.57022	2.1115
MAGI3	-0.32681	2.11102
EP300	-0.32181	2.11017
GALNT18	0.234747	2.10752
OPHN1	-0.24106	2.09824
TNNI2	0.789074	2.09723
LMOD3	-0.19927	2.09398
IPPK	0.122139	2.09398
NCALD	-1.02423	2.09241
UBN2	-0.24645	2.09238
AKAP13	-0.28499	2.09035
ADNP	-0.31208	2.09004
CCNI	-0.2803	2.08889
GLTPD2	0.227041	2.08711
PEG10	-0.16696	2.08711
SUFU	-0.26722	2.08583
HCFC1	-0.26757	2.08583
JCHAIN	-1.3062	2.08474
DHRS7	0.135009	2.08462
YKT6	0.142516	2.08114
SLC26A9	0.352566	2.0789
WDR45	0.158154	2.07568
ANAPC5	0.050105	2.07513
CPA4	0.223653	2.07513
ARID2	-0.27879	2.07513
NFIA	-0.3675	2.07513
KMT2D	-0.38334	2.07292
TMEM214	-0.22159	2.07292
MUC7	-0.40055	2.07215
DNASE1L3	0.429577	2.07215
LRRC7	-0.40636	2.07159
APOL2	0.207197	2.07159
AP003396.2	-0.32358	2.07159
SYCP3	-0.42069	2.07159
AL162578.1	-0.76322	2.07159
CREB3L1	-0.41445	2.07159
IGHV3-30	-1.50613	2.07152
NLRX1	0.135967	2.07124
PTCH1	-0.28603	2.06681
SNRPA	0.066509	2.06548
PSTPIP2	0.083001	2.064
SLC25A23	-0.28104	2.0639
MBTPS2	-0.22392	2.06178
CMPK2	0.802114	2.06178
HGSNAT	-0.34581	2.06178
VAPB	-0.21577	2.06178
TRAPPC2L	0.178951	2.06178
LAP3	0.231162	2.05986
DENND4A	-0.29793	2.05894
DNAJB6	0.139306	2.05863
ZSWIM1	-1.50006	2.05526
SLC1A2	-0.56196	2.05526
PSME1	0.245071	2.05221
B3GAT2	-0.83622	2.05221
DHX15	0.037516	2.04913
ITGA11	-0.41774	2.04578
NOD2	0.126495	2.03931
OSM	0.245921	2.03832
CHI3L2	0.882116	2.03262
CLCA2	0.219286	2.03212
HIGD1A	0.254015	2.03212
SFI1	-2.35153	2.03212
ZNF585B	-0.22151	2.03136
B4GALT1	-0.77504	2.03136
TRRAP	-0.30333	2.03126
ZNF410	0.039184	2.03126
HAT1	0.181615	2.03126
PSMB10	0.366962	2.02991
GTF2B	0.174173	2.02882
CBX5	-0.22862	2.02801
RNF223	0.277427	2.02743
CTDNEP1	-0.36569	2.02646
FNBP1	-0.13792	2.02193
TRMO	0.103455	2.0215
FN3K	-0.39647	2.01779
IP6K2	0.111305	2.01575
ADD2	-0.45743	2.01035
TNIK	-0.27456	2.01035
LRRC37A	-1.68348	2.00973
MCHR2	-0.13399	2.00973
NPFFR1	-0.36008	2.00733
AC109486.1	-0.74103	2.00709
SMARCA2	-0.31248	2.00687
RNF181	0.16469	2.00305
DKK4	0.316125	2.00305
FERMT1	0.141425	2.00305
PPIH	0.162775	2.00305
ADGRG2	-0.29901	2.00127
KRT23	0.194282	2.00127
ELFN2	-0.24352	1.99975
CDK19	-0.22161	1.99901
LIMA1	0.136509	1.99806
GBP2	0.29735	1.99782
PAK1IP1	0.201417	1.99782
BUD31	0.137321	1.99719
EPHA8	0.079288	1.99719
ATN1	-0.58164	1.99578
C1orf131	0.040097	1.99413
MS4A10	-0.30703	1.99413
NEO1	-0.30515	1.9936
RABGAP1L	-0.24121	1.99307
WRAP53	0.117084	1.99307
CLASP1	-0.34562	1.99078
OR7C1	-0.40177	1.99078
SUMO2P8	-0.86331	1.99078
AC006144.1	-0.36859	1.98967
AC008567.1	-0.2651	1.98938
AC092910.2	-0.69887	1.98825
PET100	0.242672	1.98624
CENPW	0.278333	1.98526
TFG	0.089016	1.98526
ZFAND2B	0.101587	1.98526
CCDC97	-0.22291	1.98526
CCDC38	-0.51501	1.98121
SUZ12P1	-1.16779	1.98121
NF1	-0.40898	1.98121
LRRN3	-0.54222	1.98121
ATP5MPL	0.164192	1.98121
SGIP1	-0.52963	1.98121
GLUL	0.332987	1.98008
ZNF383	-0.20495	1.97998
CHDH	-0.22638	1.97692
NOL4	-0.30923	1.97584
BCL2	-0.34539	1.9746
PPP1R15A	0.138317	1.97282
RUNX3	-0.36204	1.97221
GPC6	-0.38153	1.97148
CYCSP38	-0.71269	1.97067
COL5A1	-0.54666	1.96903
SURF1	0.140514	1.96903
ORAI2	-0.25452	1.96698
KMT2C	-0.33006	1.96655
GALNTL6	-0.31222	1.96655
FGFBP1	0.440384	1.95816
CELSR2	-0.35043	1.95686
CTSL	0.392557	1.95618
XPNPEP3	-0.13173	1.9524
SLC36A2	-0.19166	1.94738
TMEM126A	0.108499	1.94738
TRIM45	-0.4013	1.9467
KCNJ6	-0.15239	1.9467
ADM	0.454342	1.9467
FAM89A	0.234972	1.94622
TIMM17A	0.132756	1.93871
RAB35	0.055385	1.9382
CACYBPP1	-0.53468	1.93786
ROMO1	0.219529	1.93708
SPEN	-0.24605	1.93708
SYCE1	-0.32067	1.93708
PSMA2	0.192774	1.93708
VWA8	-0.28296	1.93479
LINC00643	-0.21475	1.9336
CHAMP1	-0.2971	1.9336
DYNLL1	0.1828	1.93356
NKG7	0.51118	1.93279
ERN2	-0.26353	1.93279
KIAA1549	-0.23657	1.92711
UBE2F	0.146744	1.92564
KIR3DX1	-0.34264	1.92564
PFN1	0.084986	1.92564
MYO16	-0.26281	1.92564
RNF7	0.114195	1.92564
CHERP	-0.2085	1.92564
FBXO45	0.236043	1.92441
AC080014.1	-0.21358	1.92441
RFTN2	-0.42391	1.92362
EPHA2	0.1791	1.92362
CALHM6	0.52672	1.92362
DDX41	0.136571	1.92261
HNRNPA3	-0.32207	1.92261
TPMTP2	-0.53711	1.92256
TRIML2	-0.79451	1.92092
XIAPP2	-0.28592	1.92092
FOXG1	-0.08904	1.92092
KIAA1958	-0.26788	1.92013
PSMB6	0.205975	1.92013
LIMS2	-0.45527	1.9182
TMEM254	-0.29225	1.91667
TXNDC17	0.267718	1.91541
ATP2B3	-0.1197	1.91541
MUC21	-0.10383	1.91411
CXorf40B	0.168396	1.91336
MMP16	-0.39727	1.91247
PMAIP1	0.288473	1.9102
ZNF680	-0.27314	1.90918
CHCHD5	0.200866	1.9085
PRKAG1	0.102604	1.90323
SUPT4H1	0.154111	1.90232
LCE1F	0.526384	1.901
AL512646.1	-1.17018	1.901
TTC3	-0.22049	1.901
PCDH9	-0.79784	1.901
LTF	1.34719	1.90088
WNT7A	0.373076	1.90045
FCGR3A	0.265043	1.90045
PRDX1	0.212907	1.90045
SEMA3B	-0.65135	1.89916
ZNF385C	-0.34766	1.89765
DCBLD2	-0.22634	1.89765
DTX4	-0.53596	1.89751
RDH10	0.03775	1.89718
ISG20	0.40959	1.89553
EPHB2	0.437351	1.89541
LCE2A	0.424529	1.89541
TRAPPC9	-0.40297	1.89541
CD163	-0.17449	1.89529
DIRC3	-0.25393	1.89246
CFL1	0.119268	1.89243
EHBP1	-0.31503	1.89237
TBCK	-0.46003	1.89174
FBXO4	0.091473	1.88653
SHCBP1	0.161453	1.88653
FKBP9P1	-1.10835	1.88653
FAM110B	-0.7675	1.88505
AC007161.2	-0.45727	1.88489
ULK3	0.21155	1.88476
ARHGAP32	-0.22003	1.88476
MTX2	0.049792	1.88415
TNRC6B	-0.20672	1.88415
ATXN2L	-0.23287	1.88287
AL049767.1	0.486945	1.88115
SGCE	-0.35293	1.88085
ZNF808	-0.20445	1.8795
SCAF4	-0.29948	1.87727
PSMA1	0.111604	1.87659
HAUS1	0.082801	1.87624
CCL13	0.759307	1.87427
HSPB3	0.526178	1.87407
THBS1	-0.68102	1.87327
MIF	0.224757	1.87327
SLC13A2	-0.36528	1.87327
PTPRN2	0.130634	1.87265
SLC12A7	-0.47696	1.86782
ZMIZ1	-0.34378	1.86729
HTR3A	0.432326	1.86729
CCDC83	-0.28074	1.86729
ZNHIT2	0.157738	1.86729
GTF2H4	0.819096	1.86674
EEF1A1P31	-1.93449	1.86582
MID1	0.175783	1.86582
RBM3	0.215532	1.86582
AIMP2	0.15764	1.86582
IQSEC2	-0.23628	1.86262
TNFAIP1	0.067171	1.86155
TRIM21	0.279794	1.86104
SERPINB7	0.303226	1.86034
PTBP2	-0.24267	1.86022
CMTR1	0.110385	1.86
NCOR2	-0.39056	1.85943
GM2A	0.191721	1.85753
PCGF1	0.068554	1.85663
NFAT5	-0.34974	1.85663
GRIN3A	-0.2869	1.85663
AC104852.1	-0.14751	1.85504
IGKV2-28	-1.46742	1.85313
PFKFB2	0.184792	1.8507
CARD19	0.176614	1.8507
INPP5K	0.06915	1.84981
NEDD4L	-0.73975	1.84689
PPIL6	-0.19425	1.84682
NANOGP1	-0.27672	1.84682
TMEM70	0.132478	1.84478
C1QC	0.638185	1.84349
SIRT7	0.161363	1.84349
PUM2	-0.2972	1.84161
GBP5	0.429557	1.84161
CD177	0.167921	1.84161
AIM2	0.38106	1.84161
SEC16B	-0.44935	1.84161
KCNJ16	-0.30205	1.84147
AL158201.1	-0.21497	1.84147
CXXC1	0.128397	1.84147
TXN	0.271681	1.84147
SETP21	-0.41742	1.84147
KRT18P57	-0.34653	1.84147
RIC8B	-1.31791	1.84092
OAS3	0.484745	1.84043
CAP1	0.103854	1.83831
FBXO48	-0.38933	1.83315
AC016582.3	-0.45834	1.83032
COMMD9	0.070512	1.82976
MARK2	-0.19696	1.82892
SAP30BP	0.128114	1.82635
EYS	-0.40884	1.82635
FAM71F2	-0.23365	1.82635
TLK1	-0.55258	1.82524
RPL23AP18	-0.69102	1.82343
AC079416.1	-0.40399	1.82166
CASP7	0.207954	1.82128
MECP2	-0.23126	1.82098
PHKB	-0.19983	1.82008
UROD	0.15886	1.82008
ZBED8	-0.31448	1.81845
SEC13	0.081396	1.81845
APOOL	-0.17981	1.81676
LCE4A	0.490095	1.81607
SQOR	0.153211	1.81405
FAM182B	0.310895	1.81249
AC183084.1	0.334864	1.80972
TTC21B	-0.34079	1.80893
UNC119	0.155676	1.8088
ATP6V0D1	0.134266	1.8088
EBNA1BP2	0.121347	1.80821
NIPBL	-0.26749	1.80821
PDCD5	0.182523	1.8078
LY6D	0.209822	1.80725
PLSCR1	0.320095	1.80669
PPFIBP1	-0.23964	1.80645
EHD2	-0.34948	1.80315
ATP5IF1	0.195535	1.80245
TMBIM1	0.116116	1.80245
MT-CO1	-0.4493	1.80241
NT5C2	-0.0222	1.8012
GADD45GIP1	0.129829	1.8012
GNL3	0.109818	1.8012
BCORL1	-0.33618	1.8012
CEP41	-0.15695	1.80054
EPHA3	-0.22891	1.79979
NPM1P37	-0.48611	1.79979
SCN9A	-0.42547	1.79777
ZNF850	-0.17471	1.79777
RNF149	0.040906	1.79688
BRD7P4	-0.36012	1.79442
FGF11	0.172804	1.79381
TPM4	0.119302	1.79381
MAP9	-0.2277	1.79286
ARHGAP26	-0.51468	1.79101
OSR1	-0.54289	1.79068
CHAD	-0.32742	1.78779
EXOSC8	0.065955	1.78722
LDHA	0.241543	1.78653
KRT37	0.238318	1.78653
TFAP4	-0.21368	1.78628
C8orf58	0.093434	1.78611
FBLIM1	0.142007	1.78611
PLA2G4E	0.217513	1.78604
STEAP4	0.659674	1.78594
MBD1	0.011148	1.78577
IGFL3	0.373671	1.78539
AL161742.1	-0.41364	1.78387
DNAJC8	0.082132	1.78344
PEAK3	-0.40958	1.78186
PCDHA5	-0.32457	1.78052
FAM162A	0.21296	1.78029
SDR9C7	0.224707	1.78001
EYA3	-0.29589	1.78001
MPRIP	-0.11763	1.78001
AL591135.1	-0.04705	1.78001
RAET1L	0.363146	1.78001
SAAL1	0.036284	1.78001
SLC9A1	-0.32359	1.77931
PLB1	0.095554	1.77672
LIMK2	0.096945	1.77594
RIOK1	0.053914	1.7713
MATN4	-0.80107	1.7708
TNIP2	0.147957	1.7708
CALML3	0.374862	1.7708
KCNJ13	-0.46774	1.7708
MRO	-0.12309	1.76998
TES	0.070405	1.76998
DNM1	-0.90849	1.76998
RPL36AL	0.18053	1.76998
AK2	0.048811	1.76978
TGM1	0.271804	1.76911
TAF11	0.077882	1.76882
PAK2	-0.27864	1.76882
OR7D2	-0.31302	1.76882
TGFB3	-0.42044	1.76882
MBD5	-0.42127	1.76882
POLR2A	-0.5987	1.76882
RPS6KA6	-0.71339	1.76882
HIVEP3	-0.38909	1.76882
ZNF738	-0.28258	1.76882
GBP1P1	-1.81559	1.76882
PSMB7	0.160762	1.76812
AC093227.2	-0.45127	1.76803
IRF2BP2	-0.10803	1.76803
GPR83	-0.33867	1.76803
CYBB	0.397272	1.76803
NAA20	0.149612	1.76803
SLURP1	0.376139	1.76705
HARS	0.046009	1.76705
RPS16P5	-0.66464	1.76676
AZGP1	0.286371	1.76611
ATP5MD	0.226979	1.76578
KIF9	0.140647	1.76536
NRDE2	-0.28879	1.76449
SH3GL3	0.294096	1.76388
RHOXF2	-0.45811	1.76388
TMSB10	0.229521	1.76381
SLC38A5	0.200877	1.76358
MAGEL2	-0.06958	1.75778
NEUROD1	-1.37322	1.75724
STN1	0.105852	1.75724
CCDC51	0.12315	1.7556
PHC3	-0.23991	1.7556
ZNF333	-0.37139	1.7556
FAM45A	0.119193	1.7556
SMIM18	-0.48622	1.7556
TTC39A	0.196202	1.7531
ANKHD1	-0.25334	1.7531
PBK	0.262192	1.75094
WDR45B	0.071918	1.75094
KLK6	1.1054	1.75067
ZNF208	-0.53881	1.75067
ADAM22	-0.32676	1.74978
RNASEH2B	-0.37337	1.74792
SNX10	0.192553	1.74684
TSPAN14	-0.19174	1.74405
MED6	0.041558	1.7437
ZNF827	-0.39717	1.74246
RASSF7	0.165585	1.7406
SNRPG	0.18388	1.7406
DDOST	0.083702	1.7406
ZNF609	-0.21981	1.74055
SLC25A48	-1.01543	1.74055
SEC16A	-0.20904	1.74055
MFSD4BP1	-1.71268	1.74017
GPLD1	-0.65221	1.73934
RAB5A	0.155597	1.73896
TMEM132C	-0.2648	1.73832
KRTDAP	0.227091	1.73746
MRC2	-0.43604	1.73746
MAPK6	0.106314	1.73606
VPS29	0.13375	1.73558
TSHR	-0.41729	1.73439
TCTEX1D2	0.247858	1.73439
SEMA3E	0.005123	1.73273
ANKRD36BP2	-0.46546	1.73237
AL022334.1	-0.30417	1.73237
GSTP1	0.184297	1.73237
MAST3	-0.29159	1.73237
PPM1K	-0.45127	1.73198
HLA-DQB1	1.77144	1.73177
HIST2H2AA4	0.332026	1.73177
CCDC171	-0.44734	1.73177
SNAPC5	0.102766	1.73177
ORC4	-0.2289	1.73177
DAPK3	0.158018	1.73177
SSNA1	0.13715	1.73177
MOBP	-0.19148	1.73139
COX7A2	0.194111	1.73135
HLA-C	-2.07475	1.73022
TSG101	0.083676	1.73022
RAMP3	0.3376	1.72882
GPR87	0.144199	1.72837
GLG1	-0.16727	1.72546
RNF25	0.143587	1.72536
CXCR4	0.42721	1.72536
AP2S1	0.149245	1.72319
NCOA6	-0.28214	1.72012
MMS22L	-0.22204	1.71966
CTSA	0.135951	1.71954
MRPL37	0.073149	1.71908
PAK5	-0.22419	1.71908
C1QA	0.599415	1.71908
CENPX	0.173848	1.71824
ZNF527	-0.53193	1.71824
TUBGCP4	-0.74916	1.71763
SLC25A5	0.179378	1.71635
KMT5A	0.040801	1.71635
RABL2B	-0.29635	1.71635
Z98749.3	0.262255	1.71635
TSKU	-0.22376	1.71635
TBX3	-0.37157	1.71511
GAP43	-0.51335	1.71451
VSIG8	0.37381	1.71384
DHRS1	0.190319	1.71352
WISP3	0.563847	1.71352
DISP2	-0.64066	1.71172
SFMBT2	-0.32322	1.71172
FTSJ3	0.067808	1.71145
ACSF3	-0.26255	1.71054
PPP2CA	0.17823	1.71006
KIAA1549L	-0.2391	1.70765
TGFA	0.192323	1.70765
YWHAH	0.090923	1.70723
PRRC2B	-0.26342	1.70689
SLC13A5	-0.50517	1.706
OGN	-0.62052	1.706
DNAH11	-0.54366	1.706
PAK3	-0.4065	1.70586
CDC37	0.083422	1.70566
ZNF117	-0.50616	1.70566
PRAME	0.216095	1.70566
POLR2L	0.202478	1.70566
OR6C75	-0.43924	1.70566
PSMA7	0.134506	1.70501
HOXA6	-0.6028	1.70501
DUSP12	0.116974	1.705
PRSS27	0.684059	1.70163
KIF6	-0.11451	1.6998
FTO	-0.23467	1.6998
MOGAT3	-0.39612	1.6998
OR1I1	-0.33202	1.6998
TF	-0.52345	1.69916
PRKACA	-0.28721	1.69916
TBK1	0.048202	1.69916
FAM110C	0.301788	1.69854
SPAG7	0.098204	1.69714
AC122718.2	-0.60771	1.69534
GHITM	0.15384	1.69459
LYZ	0.471416	1.69246
MAMLD1	-0.40195	1.69221
SLC29A4	-0.33495	1.69221
NCKAP5	-0.18711	1.69221
IVL	0.270117	1.69023
RSRC2	0.077946	1.68949
TET3	-0.27289	1.68881
CHCHD1	0.146398	1.68877
HMOX1	0.223047	1.68859
APELA	-0.27842	1.68773
GLTP	0.165553	1.68531
MRPS28	0.085855	1.68377
EXOC1	0.073092	1.68346
PHEX	-0.26443	1.68291
MT-CYB	-0.8673	1.68291
MRPS36	0.115173	1.68291
EMC6	0.148678	1.68291
TNKS	-0.31486	1.68188
CD9	0.153644	1.68178
SAMD4B	-0.28071	1.68159
BTG3	0.132456	1.68117
MOSPD1	0.131274	1.68014
EFCAB11	-0.22309	1.68014
GKAP1	-0.32649	1.67905
DCUN1D5	0.04771	1.67905
ZNF559-ZNF177	-0.50233	1.67889
GAR1	0.141982	1.6785
PDCL3	0.15963	1.6785
RASA4B	0.449181	1.67849
NES	0.349501	1.67849
ARSF	0.521083	1.67849
ZCCHC14	-0.19914	1.67849
EHBP1L1	0.133569	1.67849
PTPN14	-0.29748	1.67849
BRD4	-0.28953	1.67849
GRM6	-0.20865	1.67849
PPEF2	-0.44353	1.67778
DNAJB11	0.103162	1.6775
TESMIN	-0.30494	1.6775
TRNAU1AP	0.082104	1.6775
C12orf56	0.270909	1.6774
ANAPC15	0.179285	1.6774
POLR3G	-0.00185	1.6774
CR589904.1	-0.41321	1.6774
PDE6B	-0.46517	1.67667
XCR1	-0.38138	1.67396
SMAGP	0.152686	1.67396
HDAC3	0.023755	1.6731
FAM120B	-0.19867	1.67058
TMEM258	0.196082	1.66983
DDX39A	0.158048	1.66961
BRWD3	-0.25282	1.66699
IL16	-0.25907	1.66692
PDZK1IP1	0.240736	1.66692
TTC13	0.031022	1.66692
SLC16A12	-0.08496	1.66692
TTC1	0.130453	1.66509
BMP2KL	-0.45875	1.66509
EIF2B1	0.112593	1.66429
SLC25A45	-0.19682	1.66201
TMEM131	-0.2368	1.66201
RAP1B	0.088411	1.65994
ANK3	-0.3278	1.65964
CARHSP1	0.364487	1.6576
LRR1	0.248074	1.65693
TET1	-0.26887	1.65688
HSBP1L1	0.09402	1.6568
ABCC8	-0.13147	1.6568
MKL2	-0.30152	1.6568
ADAMTS9	-0.45878	1.6568
LATS1	-0.2238	1.6568
CNOT4	-0.19154	1.65666
TRPV3	0.11857	1.65666
NABP2	0.155623	1.65638
ACVR2B	-0.69755	1.65624
STXBP4	-0.18336	1.65624
AC104772.1	-0.47014	1.65624
BTF3P12	-0.69833	1.65624
DPF3	-0.39074	1.65599
ARHGEF3	0.061044	1.65551
HYAL1	0.239504	1.65517
FBXO6	0.233805	1.65517
MSL2	-0.20106	1.65389
IL37	0.390309	1.65308
SUSD2	-0.4141	1.65308
MPZL2	0.268823	1.65235
RBM22P2	-0.80811	1.65197
ZKSCAN1	-0.22649	1.64984
TRABD2A	-0.19632	1.64757
ASB11	-0.35438	1.64757
GJD2	-0.32949	1.64757
DENND2A	-0.44576	1.64668
PPIA	0.187834	1.64668
C20orf24	0.179604	1.64607
LINC00032	-0.23585	1.64519
HTATIP2	0.149463	1.6449
ARHGEF28	-0.28953	1.64468
AL807752.1	-0.38232	1.64468
WNK2	-0.46749	1.64437
TRIP6	0.094936	1.64395
MRPS7	0.089371	1.64383
GZMA	0.558427	1.64378
WWC3	-0.1294	1.64353
RIPOR1	-0.53338	1.64353
BTBD7	-0.22773	1.64263
USP18	0.433966	1.64263
NDUFB6	0.232243	1.64263
GPR68	0.157224	1.64155
ADGRA3	-0.37844	1.63878
LETM1P2	-0.0608	1.63837
CASP2	-0.22232	1.63837
MRPL13	0.190813	1.63729
MAPKAPK3	0.116211	1.63619
AL353748.2	-0.58981	1.63619
CD24	0.459015	1.63487
TMEM94	-0.33619	1.63487
ATP6V1E1	0.139583	1.63487
IGLV3-10	-0.83705	1.63478
AIPL1	-0.26388	1.63468
ARL2BP	0.260927	1.63468
IRS1	-0.32156	1.63468
ZNF536	-0.17965	1.63468
WDR34	0.141276	1.63376
SDHB	0.118614	1.63122
ZNF598	0.122353	1.63089
DTX3L	0.278455	1.63003
NBEA	-0.40301	1.63003
NAMPT	0.352645	1.63003
ZNF728	-0.31346	1.63003
ATXN1	-0.34383	1.63003
LAD1	0.102851	1.6284
ENSA	0.087035	1.62822
C13orf42	-0.55189	1.62822
GUCY2C	0.243186	1.62822
CCRL2	0.199796	1.62814
HDAC1	0.081571	1.62813
TMEM201	-0.24333	1.6275
GRN	0.144699	1.62743
BAK1	0.215555	1.62743
DEPDC7	0.154188	1.62734
WDR7	-0.22683	1.62707
STARD9	-0.48076	1.627
SYF2	0.12565	1.627
NIPSNAP3B	-0.40728	1.627
EFCAB5	-0.4779	1.62687
NDUFA9	0.133931	1.62607
ACP1	0.094446	1.62541
ZBTB8B	-0.25266	1.62352
TDRD5	-0.20447	1.62352
SYT8	0.349696	1.62305
MRPL39	0.162942	1.62177
IGF2BP2	-0.14818	1.62177
ZFP42	-0.32769	1.62161
FGF23	-3.21479	1.62107
AC092641.1	-0.44216	1.62087
S100A16	0.167319	1.62087
AC019206.1	-0.65162	1.62087
HOOK3	-0.18223	1.62087
PLEKHA3	-0.05055	1.62087
BCORP1	-0.19344	1.62
ZNF347	-0.30027	1.62
PILRA	0.195296	1.62
ASNA1	0.155378	1.62
COQ3	0.165452	1.62
PLAGL2	-0.26154	1.61995
SON	-0.1538	1.61873
STAT2	0.175134	1.61731
AP002981.1	-0.56738	1.61731
TENM4	-0.46858	1.61563
ERI3	-0.00607	1.61472
FUT3	0.105424	1.61472
NLGN2	-0.33224	1.61468
MORN2	0.204789	1.61377
PSMD13	0.083396	1.6132
KLHL34	-0.15142	1.61159
UBD	0.733332	1.61159
SYVN1	-0.25048	1.61042
RPS3AP38	-0.56119	1.60989
ZNF676	-0.37472	1.60908
FLVCR2	0.152032	1.60906
IKBKG	0.119514	1.60906
AL590282.1	-0.38356	1.60906
NTN5	-0.19637	1.60906
CCDC94	0.121191	1.60906
COX20	0.21576	1.60906
PEG3	-0.47221	1.60906
AC006011.2	-0.21932	1.60906
CCDC80	-0.62143	1.60906
ANKRD17	-0.26108	1.60355
COMMD3	0.108496	1.60339
TBC1D8B	-0.46492	1.60186
LMNTD1	-0.45891	1.60118
HSPD1P3	0.407862	1.60048
PCNX1	-0.27336	1.60041
FASN	-0.61439	1.59892
LRRC69	-0.49098	1.59844
DPYSL5	-0.1043	1.59838
ZDHHC2	-0.46601	1.59809
MSN	0.115306	1.59715
GLRX	0.327857	1.59715
TTLL11	-0.20338	1.59715
SPATA6	-0.20436	1.59715
CCDC60	0.216206	1.59648
ESRRG	-0.49775	1.59604
AL096700.1	-0.56041	1.59528
GTF2A2	0.138821	1.59528
SETD1B	-0.37617	1.59382
SRGAP2	-0.29364	1.59348
NEK9	-0.16739	1.59348
AP1S1	0.193031	1.59348
SLC19A3	-0.71964	1.59348
NOL12	0.181435	1.59348
UBASH3B	0.104259	1.59348
CX3CL1	-0.31094	1.59348
SOX6	-0.39764	1.59348
PARP14	0.359901	1.59283
KRT16P6	0.493029	1.59233
DDX60	0.234662	1.59097
AL356432.3	-2.63951	1.59097
SOAT2	0.226341	1.59097
VPS33A	0.125107	1.59097
EPN3	0.135355	1.59097
PPP3R1	-0.34291	1.59097
ARID3A	-0.76308	1.59097
SEM1	0.191817	1.59097
TMEM136	-0.25642	1.59097
CEP192	-0.18734	1.5897
STYK1	-0.05754	1.5897
SMIM4	0.173014	1.58967
ZCCHC9	0.118108	1.58953
SLC27A1	-0.33999	1.58953
TBC1D14	0.048387	1.58868
BNIP3P39	-0.56406	1.58791
PLAU	0.266025	1.58791
UQCR11	0.149723	1.58783
SNRPA1	0.085197	1.58472
SKP1	0.161453	1.58466
SLC3A1	-0.36365	1.58362
SPATA31C1	-0.19398	1.58352
MRPS24	0.131884	1.583
ILF2	0.106322	1.58263
GRAMD2A	0.051769	1.58253
TSPAN19	-0.40936	1.58253
FCHSD1	0.255399	1.58253
RPL26L1	0.189998	1.58253
CCDC110	-0.28586	1.58245
BTF3	0.132499	1.58195
QRFP	-0.32127	1.58195
GUK1	0.122172	1.58195
POLR2J	0.133392	1.58134
FAM96B	0.161092	1.58134
RNF24	-0.23703	1.58043
NLGN4X	0.094195	1.58043
NOL4L	-0.32436	1.5782
OR14J1	-0.48929	1.5782
LEF1	-0.39471	1.5781
SERPINB1	0.278842	1.57702
TAP1	0.389729	1.57702
ZKSCAN8	-0.20329	1.57669
AC270267.2	-0.88448	1.57669
TMEM221	-0.30757	1.5762
EMC4	0.11687	1.5762
CES1	-0.76858	1.5762
POLR2K	0.193063	1.57597
DYNLT1	0.143618	1.57506
GTF2H1	0.034006	1.57456
RAD54B	-0.38366	1.5745
KCTD2	0.13933	1.5744
PDE6A	-0.38705	1.5744
MOAP1	0.093124	1.5744
IGFL1	0.837215	1.57318
WIF1	-0.65401	1.57287
ATP5MG	0.203916	1.57152
GVQW3	-0.30297	1.57028
ASH1L	-0.19311	1.56927
UBE2D3	0.091637	1.56922
KAT5	0.088126	1.56867
FGFR3	0.146259	1.56867
NFE2	0.328429	1.56867
MYZAP	0.171969	1.56867
GATB	0.24351	1.56863
TAF9	0.175703	1.56727
KLRD1	-0.44939	1.56664
SLC35B1	0.107369	1.56664
PSMD8	0.141183	1.56611
IKZF4	-0.28804	1.56607
ZNF469	-0.16698	1.56521
NR6A1	-0.24403	1.56495
ZNF229	-0.37363	1.56387
RREB1	-0.25099	1.56387
CCDC169	-0.44812	1.56387
ZNF492	-0.32645	1.56387
USF3	-0.18037	1.56273
TOR4A	0.205758	1.56273
VENTXP6	-0.85132	1.56252
TTC6	-0.52714	1.56213
POLR2G	0.122162	1.56213
ATP5F1E	0.126852	1.55777
TUB	-0.2706	1.55775
AC097063.1	-0.21257	1.55762
TWF1	0.225217	1.55762
FAM234B	-0.27298	1.5558
KDM3B	-0.59688	1.55488
UQCRQ	0.127876	1.55415
PAIP2	0.105016	1.55415
IFNGR2	0.100741	1.55344
CYC1	0.105414	1.55012
MAPK3	0.137003	1.55012
RFX4	-0.44407	1.55012
NDUFV1	0.069917	1.54998
SNRPGP18	-0.85487	1.54946
GPR149	0.131349	1.54777
AC002366.1	-0.1843	1.54502
MRPS22	0.105478	1.54502
ZSCAN18	-0.31987	1.545
ZNF677	-0.23372	1.5441
EFNB3	-0.29376	1.54315
PPIAP91	-0.52599	1.54315
AL592148.2	0.507998	1.54296
UNC50	0.086984	1.54115
PIH1D3	-0.17058	1.54098
CDC42EP4	-0.27119	1.54098
TXNDC9	0.181248	1.54072
VDAC2	0.091663	1.54017
VDAC1P8	-0.51025	1.53824
CAPZA1	0.048255	1.53824
CDH13	0.120193	1.53824
AC140479.4	-0.38501	1.53769
RPUSD1	0.155386	1.53752
AL136981.2	-0.38031	1.53659
ALG5	0.114667	1.53659
LYPD6	-0.2374	1.53659
MED31	0.169204	1.53646
HOXC10	0.457493	1.53617
MACO1	0.055901	1.53395
BRAF	-0.25288	1.53395
EXOSC6	-0.27216	1.53395
RPL7P7	-0.38173	1.53395
UPP2	-0.20064	1.53395
COX6C	0.188094	1.53395
AGO3	-0.1768	1.5339
POLR2C	0.096349	1.53243
ACP5	0.255563	1.53155
ZUFSP	0.064636	1.53143
LSM2	0.144299	1.53028
OR52I1	-0.29414	1.53
GPR173	-0.28669	1.53
POLE4	0.2027	1.53
NAE1	0.062332	1.52908
KLF4P1	-0.26883	1.5289
PFKP	0.104989	1.5289
PSMA4	0.194248	1.52856
TFIP11	0.08168	1.52788
LSM1	0.128345	1.52788
FCGBP	-0.54582	1.52642
PCDHGA8	-0.22878	1.52642
BPTF	-0.25677	1.52608
AP000926.1	-0.48417	1.52569
EHF	0.272068	1.52555
PIGM	-0.19705	1.5239
MRPL21	0.162465	1.5239
BLOC1S2	0.166848	1.52327
OSER1	0.093715	1.52302
PTPN23	-0.22098	1.52233
EPPK1	-0.46122	1.52233
PRPF8	-0.17841	1.52233
MGRN1	-0.28814	1.52233
ADAM23	0.298328	1.52233
TNFSF9	0.220627	1.52139
DCHS2	-0.31829	1.52092
ATP2A2	-0.27278	1.52071
LOXL4	-0.51253	1.5206
HELZ	-0.25333	1.5206
ZNF268	-0.17719	1.51982
SRCAP	-0.30707	1.51857
TRIM61	-0.26904	1.51812
NDUFAB1	0.161482	1.51589
PPP1R8P1	-0.34922	1.51589
NDUFS6	0.179347	1.51589
ZNF471	-0.35519	1.51589
KRT18P37	-0.26589	1.51589
AL355877.1	-0.36847	1.51568
PRR12	-0.40311	1.51462
LETM2	-0.19837	1.51267
ARIH1	-0.11735	1.51166
DNAH17	-0.25845	1.51141
PSMD3	0.095677	1.5112
BAHCC1	-0.31856	1.51089
RNF215	-0.37641	1.51042
NOP10	0.147608	1.5089
ACBD6	0.008505	1.50884
GPX1	0.15148	1.50779
NFXL1	-0.26445	1.50779
ANKRD1	-0.24014	1.50727
MOXD1	0.230705	1.50689
GLB1	-0.06815	1.50676
NMI	0.256679	1.50605
GPR37L1	-0.18344	1.50605
SPATA5L1	-0.03651	1.50605
SYK	0.109029	1.50525
RPH3AL	-0.61121	1.50525
TMPRSS11GP	-0.60852	1.50513
LRP12	-0.27305	1.50513
TSTA3	0.13812	1.50513
NAT1	0.217734	1.50421
DNAH9	0.164004	1.50345
MAGEA10	-0.2979	1.50345
MARCKS	-0.26855	1.5034
NSMCE2	0.00809	1.5002
GTPBP2	-0.00914	1.49952
IGLL5	-0.58745	1.49836
MYH7B	-0.48499	1.49834
SMYD2	0.0442	1.49752
CPSF3	0.137624	1.497
GRIK3	-0.07313	1.497
PURA	-0.24667	1.49689
GABARAPL2	0.163425	1.49651
AC110994.2	-0.52701	1.49651
CSDC2	-0.22958	1.49632
HLA-DQA2	-0.57681	1.49618
AC139769.3	-0.66211	1.49536
MPHOSPH8	-0.20443	1.49383
EMC3	0.196079	1.4938
RUNX1T1	-0.57012	1.4938
IQSEC1	-0.33313	1.4938
IMPDH1	0.140444	1.49348
ZDHHC15	-0.381	1.4934
ZSCAN21	0.060673	1.4934
PLLP	-0.38235	1.49185
NDUFB3	0.136476	1.49185
EIF6	0.177195	1.49177
TMEM121B	-0.17083	1.49095
PON2	0.036756	1.48983
FAR2P1	-0.03461	1.48983
AC022826.1	-0.44455	1.48983
TINF2	0.038573	1.48983
LYSMD4	0.090127	1.48763
ZNF43	-0.35577	1.48645
MTCH2	0.146752	1.48645
RAB24	0.113617	1.48645
KARS	0.089408	1.48645
COPE	0.116151	1.48645
CWC25	0.111267	1.48591
ULBP2	0.283234	1.48591
YBX1P3	-0.3209	1.48497
DTWD1	-0.22963	1.48497
QSOX1	0.144424	1.48307
DSG2	-0.33743	1.48289
HNF4A	-0.18152	1.4828
ARNT	-0.20966	1.4828
SPAG17	-0.48546	1.48117
LRRC17	-0.4523	1.48088
DAPL1	0.279851	1.48088
CCDC170	-0.56348	1.48017
FAM49B	0.028657	1.47987
RPL21P44	-0.56845	1.47948
AK5	-0.63675	1.47932
FOXP4	-0.3362	1.47932
CCDC12	0.092485	1.47932
MT-ND5	-0.92861	1.47828
TCEANC2	-0.11835	1.47828
AC007494.1	-0.46405	1.47797
PSMG1	0.175193	1.47732
OR9K1P	-0.12259	1.47728
CDK5RAP1	0.038517	1.47728
FAM129C	-0.35875	1.47728
RAD52	-0.70813	1.47713
AC139769.1	-0.33518	1.47713
DLGAP4	-0.22875	1.47598
STK35	-0.21926	1.47581
SATL1	-0.42564	1.47581
PSMD14	0.137432	1.47581
ZEB2	-0.59717	1.47408
B2M	0.274167	1.47408
ITIH5	-0.57054	1.47384
ORMDL2	0.17208	1.47384
SPINT2	0.127299	1.47272
HERC2	-0.20485	1.47272
EPHA10	-0.14615	1.47272
LCE2C	0.360595	1.4727
C12orf74	0.088255	1.47171
SMG7	-0.32008	1.471
RAB11FIP1P1	-0.41647	1.471
EMSY	-0.26029	1.471
POU5F2	-0.36074	1.471
FLRT2	-0.30484	1.471
IGHA2	-1.46804	1.471
PCBP2	-0.281	1.471
EFCAB10	-0.28436	1.471
AC095040.1	-0.45131	1.471
AIF1	0.32963	1.471
GSK3B	-0.23818	1.4693
DMKN	0.15583	1.4693
AC011511.1	-0.40206	1.46897
GCOM2	-0.33696	1.46891
C3orf49	-0.35585	1.46818
MMADHC	0.143317	1.46815
DUS2	0.021594	1.46815
POU2AF1	-0.303	1.46815
ZNF318	-0.2411	1.46813
CAMTA2	-0.40911	1.46734
RLIMP1	-0.44559	1.46727
NPLOC4	0.020905	1.46655
TMEM236	-0.25247	1.46647
NPNT	-0.27859	1.46647
SUPT16HP1	-0.07926	1.46647
TCEANC	-0.27154	1.46647
PLAT	0.27487	1.46619
BICRA	-0.23276	1.46619
ZNF124	-0.29706	1.46619
PIP5K1C	-0.33225	1.46619
NDUFV2	0.098384	1.46613
NSMCE4A	0.099582	1.46585
ATP2B4	-0.21047	1.46585
KCNV1	-0.3079	1.46569
MT-ND4	-0.89536	1.46569
FBXL20	-0.20596	1.46569
ODF3B	0.403206	1.46486
BEND7P1	-0.43365	1.46387
DLX1	0.289681	1.46311
BTBD10	-0.0171	1.4626
SARS	0.065724	1.4595
GPC3	0.348657	1.4595
WRB	0.041913	1.4595
FAM237B	-0.10819	1.45677
GTF3C6	0.148277	1.45624
GNA15	0.162756	1.45613
ERCC3	-0.00206	1.45612
HLA-F	0.715498	1.45612
POP7	0.127038	1.45589
QPCT	0.274956	1.45507
ETFA	0.077397	1.45507
UBQLN2	-0.22038	1.45463
MAS1	-0.16499	1.45453
ANKAR	-0.21812	1.45405
DPY30	0.115312	1.45405
TUBB2A	0.211	1.45381
AAK1	-0.82615	1.45381
IFIH1	0.273748	1.45381
FAM168A	-0.21705	1.45334
SCGB1D2	-1.50217	1.45246
SULT1C2	-0.15006	1.45246
SPINK4	-0.5166	1.44934
METTL23	0.050062	1.4488
ZNF493	-0.31005	1.44842
GRPEL1	0.151279	1.44842
ZNF592	-0.21577	1.44829
IL1F10	0.343612	1.44722
SYNE4	-0.20001	1.44527
BACE1	-0.16111	1.44514
TMEM50A	0.161129	1.44483
PSMD4	0.104636	1.44483
MMP1	0.184814	1.44483
GPER1	-0.20815	1.44483
APCDD1L	-0.23378	1.44409
SCD	0.356109	1.44316
IPO5P1	-0.19698	1.4416
CYP2B6	-0.33138	1.44159
PSIP1	-0.31317	1.44159
E2F4	0.084333	1.44116
HIPK2	-0.24504	1.4406
SCAI	-0.1738	1.44006
NEDD8	0.146941	1.43995
AC015802.6	0.086224	1.43926
LSM7	0.135809	1.4392
AL160281.1	-0.89622	1.43901
EMC7	0.125764	1.43813
FOXRED2	-0.27033	1.43712
NUDT8	0.212368	1.43684
IVD	-0.33056	1.43675
PTP4A1P3	-0.43156	1.43675
LGALS3BP	0.35542	1.43675
SETD2	-0.21411	1.43675
RIOK2	0.025482	1.43634
KALRN	-0.38732	1.43634
C8orf46	-0.32599	1.43611
GPR137C	-0.33305	1.43596
CFAP157	-0.29838	1.43583
PRKRA	0.067382	1.43583
RPS6KA4	0.160449	1.43583
ROPN1	-0.35096	1.43583
RFX1	-0.20951	1.43583
NT5DC3	-0.24619	1.43583
SMIM12	0.100554	1.43506
KCNA2	-0.34552	1.43506
IL18R1	0.120494	1.43506
HMGN1P24	-0.64901	1.43506
PLEKHA5	-0.25707	1.43506
DDX5	0.132159	1.43501
S100A11	0.17046	1.43461
CBLN1	0.155517	1.43427
USP31	-0.26395	1.43412
NPIPB12	-0.62024	1.43394
Z82195.2	-0.24849	1.43394
CKMT2	-0.53903	1.43394
MCUB	0.145394	1.43394
UQCR10	0.150475	1.43394
SEC63P2	-0.10943	1.43384
OR2AT4	-0.41705	1.43337
TG	-0.37322	1.43278
TALDO1	0.090483	1.43264
BTBD9	-0.62805	1.43238
ANKRD18CP	-0.10621	1.4313
ZCRB1	0.112904	1.43078
CNIH4	0.203958	1.42978
LCOR	-0.46737	1.4297
TERF2	-0.30439	1.42793
CELF1	-0.13791	1.42793
RSPO4	-0.2054	1.42793
RNF126	0.108833	1.42769
ZNF233	-0.37678	1.42695
OSBPL2	0.051798	1.42695
TDGF1	-0.29876	1.42656
CCR5	0.150401	1.42618
SLC22A1	-0.4458	1.42588
ERVMER34-1	0.268269	1.42588
NCBP2-AS2	0.14183	1.42588
TSPYL2	0.127512	1.42575
ATP6V1F	0.121757	1.42575
NUP107	0.043994	1.42575
IRAK1	0.140204	1.42573
PMF1	0.145694	1.42416
TSPAN2	0.229271	1.42402
NFATC3	-0.28255	1.42402
GSTO1	0.130531	1.42376
WASHC5	-0.04601	1.42126
ALDOC	0.261192	1.42044
HTATSF1P1	-0.38581	1.42028
C1QBP	0.135409	1.42028
SNX11	0.007631	1.41985
MCF2L	-0.2823	1.41941
MT1G	0.405988	1.41932
CNNM3	-0.28001	1.41826
MREG	0.069692	1.41826
B3GALT1	-0.29626	1.41809
RAN	0.194374	1.41809
SHROOM1	-0.16	1.41809
ATXN2	-0.372	1.41809
LONRF3	-0.31647	1.41809
CDKN2B	0.211965	1.41655
CPEB3	-0.20671	1.4158
USP34	-0.22967	1.41579
RBM12B	-0.23614	1.41425
ADIPOQ	-0.7295	1.41387
SLC35A1	0.078187	1.41383
PRMT1	0.095426	1.412
PRPSAP2	0.000314	1.41195
CDHR3	-0.43986	1.4113
FAM25A	0.503095	1.40996
MCL1	0.095733	1.40996
HOXB2	0.377889	1.40996
PBX3	-0.4267	1.40996
FBXW7	0.068447	1.40996
MTUS2	-0.02212	1.40919
TMEM14EP	-0.60811	1.4082
ANKRD44	-0.16331	1.4082
GLI1	-0.2591	1.4082
NUDT1	0.048889	1.40772
AC000367.1	-0.73616	1.40772
TARBP2	0.113824	1.40772
HDAC4	-0.2717	1.40772
ZDHHC13	0.081238	1.40772
DIO2	0.403816	1.40772
SLC2A1	0.245922	1.40772
PAN3	-0.2192	1.40772
CROCCP4	-0.27035	1.40651
ZNF263	0.053002	1.40639
IFIT5	0.268697	1.40519
FBLN7	-0.33841	1.40346
KCTD9P4	-0.2289	1.40233
MLX	0.088084	1.40232
TRPC4AP	0.043469	1.40185
MARVELD3	-0.34377	1.40185
UTP14C	-0.18853	1.40185
LCE1B	0.317529	1.40185
C4orf22	-0.18697	1.40185
CCL20	0.296942	1.40156
AC017099.1	-0.59577	1.40109
PTS	0.069198	1.40109
BLID	-0.29008	1.40039
MAGOH	0.172531	1.40027
AC233702.6	-0.49561	1.4002
IFIT1	0.699316	1.4002
YWHAEP7	-0.21493	1.4002
RPF2	0.135837	1.4002
COPS8	0.05737	1.4002
SLC25A35	-0.39035	1.4002
CYP26B1	-0.35308	1.4002
FYCO1	-0.2375	1.4002
KRT18P63	-0.39252	1.39993
LENG8	-0.85627	1.39935
CLVS2	-0.08464	1.39877
SULT1C4	-0.27875	1.39857
CMIP	-0.38563	1.39857
ASIC2	-0.24564	1.39844
CAP2P1	-0.42166	1.3978
DCHS1	-0.36639	1.39766
NKX3-2	-0.09051	1.39766
IFITM3	0.460754	1.39697
SF3B6	0.193253	1.39691
POLD4	0.095938	1.39677
CTTNBP2	-0.36173	1.3949
AC007256.1	-0.20429	1.39432
MYO10	-0.22281	1.39328
GLB1L2	0.119955	1.39299
GJC3	0.320741	1.39299
SLC3A2	0.094689	1.39299
MYLK3	-0.46001	1.39157
WDR83OS	0.117564	1.39122
COLEC12	-0.47297	1.39108
ZNF726	-0.3665	1.39092
PHLDA1	-0.28627	1.39066
RPS20P15	-0.73084	1.39041
EIF4A3	0.129263	1.39032
PWP1	0.095568	1.38893
RMC1	0.028546	1.38893
TRIM10	0.134649	1.38854
LCE1C	0.296506	1.38854
SQLE	0.28138	1.38828
IDH3A	-0.03305	1.38821
MTCO1P46	-0.10618	1.38774
RPL23AP48	-0.57598	1.38772
NAPA	0.078512	1.38761
GABRA4	-0.55244	1.387
SH3GLB2	0.114262	1.387
ABRA	-0.24648	1.38674
DOCK7	-0.12793	1.38674
SPIRE2	-0.34232	1.38674
C15orf39	-0.1803	1.38652
IL10RB	0.040801	1.38652
AC106827.1	-0.47827	1.38614
DAD1	0.146799	1.386
SPAAR	-0.29539	1.38566
TLCD2	-0.40522	1.38533
AL356968.2	-0.27489	1.38463
DAPP1	0.07924	1.38463
GYG1	0.150712	1.38463
SDS	-0.4321	1.38463
GREB1	-0.35185	1.38463
MTFP1	0.219885	1.38463
AC113155.1	-0.37536	1.38463
FSIP2	-0.60772	1.38463
GPR108	0.119707	1.38463
SPHKAP	-0.04332	1.38408
PARD6B	-0.82482	1.38408
TBX18	-0.55152	1.38388
JAZF1	-0.32708	1.38388
NPRL2	0.099917	1.38274
PPIE	-0.46524	1.38084
RFX7	-0.32865	1.38044
SP2	-0.3151	1.38044
LCN6	0.266908	1.38044
NTNG1	-0.75099	1.38044
AP3S1	0.084061	1.38001
CD93	0.257734	1.37981
GABRR1	0.124261	1.37856
TPM3	0.084215	1.37838
KRTAP21-2	-0.6132	1.37708
COL1A2	-0.73864	1.37708
CSNK1A1	0.110154	1.37575
EDA	-0.4326	1.37393
C7orf57	0.162129	1.37289
WDTC1	-0.25956	1.37289
LRRC8D	0.098226	1.37233
GAPDHP27	-0.22467	1.37043
CDK2AP1	0.135266	1.37043
CSNK1A1P1	-0.32303	1.37037
ZNF782	-0.24257	1.36939
CCM2	0.126763	1.36939
TSFM	0.150108	1.36925
AC106707.2	-0.70595	1.36877
MIEN1	0.100288	1.36877
PHACTR4	-0.17362	1.3676
CTSV	0.32075	1.3675
GBA2	0.099959	1.36707
CREM	0.10923	1.36655
ANKRD20A9P	-0.05666	1.36637
[truncated: 8,001 more rows]

## Sheet: Figure 5B
Analyzed by RaNA-seq
Peptide cross-linking	Defense response to virus	Keratinocyte differentiation	Type I interferon signaling pathway	Interferon-gamma-mediated signaling pathway	Inflammatory response	Viral process	Proteasomal protein catabolic process	Proteasomal ubiquitin-independent protein catabolic process	Response to virus
11.0147	9.37538	8.69396	8.37081	7.77093	7.25774	6.43817	6.15129	6.14243	6.06826

## Sheet: Figure 5C
Analyzed by RaNA-seq
KRT5			KRT10			KRT14			KRT16			FILAGGRIN			LORICRIN
Ctl	NL		Ctl	NL		Ctl	NL		Ctl	NL		Ctl	NL		Ctl	NL
4481.01	5608.74		16136.9	17803.7		4470.94	6036.7		35.2769	44.3987		2615.99	2781.74		1441.17	1508.95
5011.92	4084.52		9484.05	12402.6		5428.79	5558.54		37.6934	1258.46		1633.6	2095.37		798.402	844.162
4198.28	6832.25		10805	16363.6		4543.44	6103.78		76.3827	79.5644		2716.39	4835.39		1192.25	1387.34
4146.39	5365.34		10756.2	18801.8		3987.22	6899.74		68.6372	24.9195		1959.22	3836.67		1116.81	1413.37
4346.64	7694.16		15089.4	22533.5		5132.09	6193.76		86.0677	42.0376		3727.89	4483.46		1179.78	1666.06
4172.68	4401.12		13637.1	11292.1		3795.6	5220.61		35.4731	30.8633		3038.98	2988.88		1251.54	1060.87
4062.47	6935.87		13679	18038		5579.51	7765.3		35.34	48.1751		2852.93	5150.36		1464.54	2024.78
4327.49	6792.49		16735.1	20949.6		4770.59	8276.25		50.5824	944.872		3396.01	3424.84		1578.8	907.506
3320.04	6759.67		15701.8	15294.4		4619.85	5962.86		45.1125	58.1736		2539.43	5343.88		1222.19	3143.57
4877.46	3848.27		18471.2	16762.1		6179.99	4907.54		50.6406	36.44		3782.11	2540.4		1436.39	1557.2
4673.85	4456.74		14303.9	13192.5		4813.48	5116.77		81.7483	1709.86		2863.12	1506.11		1097.45	663.492
3837.91	3768.19		12980.2	13946.7		4248.41	5039.87		15.8475	88.2629		3730.23	2022.64		1522.79	905.582
4443.22	7412.7		15121.2	8926.81		5568.04	7373.69		89.0627	571.356		3612.79	2538.93		1355.24	747.077
5414.96	5499.06		15162.4	10999.7		5434.42	4963.55		70.7298	72.8068		2907.1	3189.26		1358.07	1827.12
5142.15	4813.89		13240	15482.1		7323.15	5430.27		171.195	157.848		1254.33	2408.54		610.317	1621.85
4528.75	4106.41		13782.9	15129.4		5276.9	5486.92		50.3485	55.1043		1937.23	3118.11		1000.19	1038.05
3675.96	4118.23		16376.6	10627.2		4700.27	4239.83		145.868	169.602		3307.72	2991.78		1203.43	1200.08
5261.6	4357.44		11628.2	16068.3		5481.18	4573.01		70.3081	50.1912		4355.08	5295.41		1125.42	1663.27
4589.22	5237.53		17672.7	13569.9		4928.63	5868.03		28.925	60.9473		3102.36	3096.27		1291.06	1500.34
4283.08	5206.4		19374.3	8831.63		4782.36	6551.81		18.7417	2840.24		3750.73	1962.97		1677.9	521.665
3219.2	4220.67		12443	17378.9		3954.32	5128.96		91.2415	21.8227		2555.24	2530.43		1036.55	1157.6
4572.19	4110.43		17720.8	14413.5		4013.83	4718.12		46.0261	26.258		3987.75	3703.88		1257.77	1237.31
4024.43	4859.88		15045.1	9255.04		5057.29	4753.11		51.7474	76.5169		2113.29	2470.85		1527.66	1010.38
3917.12	4286		15255.3	18218.5		4224.96	5279.27		57.9998	33.9894		5645.94	5100.62		1992.31	2525.43
5180.19	4453.45		14850.1	18297.2		3771.84	5462.4		37.263	29.281		2167.98	2227.97		943.316	1082.7
4475.42	4686.61		13767.3	16401.6		6047.07	4414.82		1780.72	600.922		4843.73	2839.11		1189.96	1017.07
5035.21	5008.01		12829.3	15272		5672.67	5176.34		56.4056	176.332		3250.99	1856.28		1081.06	1614.9
3539.27			16695.2			4323.15			40.6833			4600.67			2011.98
4433.03			18961.1			5316.59			27.9349			3017.32			1275.42
4651.89			14373.9			4349.72			71.8987			2918.04			1865.38
6113.54			9064.55			6923.6			50.6261			2989.38			885.413
6847.46			13645.9			5811.8			32.7258			3655.45			1201.61
4364.66			12843.1			4651.79			42.6628			4304.34			1515.99
5177.03			21421.4			5046.04			32.2633			2472.25			1169.07
4683.14			17784.8			5795.18			25.3757			3984.75			1694.74
4187.1			8911.94			5457.02			46.6612			3066.01			1689.39
4804.29			9119.56			5436.65			119.288			3574.61			901.145
4961.44			13747.5			5228.95			51.7019			3424.03			1818.47
	Average ± SD			Average ± SD			Average ± SD			Average ± SD			Average ± SD			Average ± SD
Ctl (n = 38)	4552 ± 702.1		Ctl (n = 38)	14437 ± 2970		Ctl (n = 38)	5057 ± 808.8		Ctl (n = 38)	103.3 ± 281.4		Ctl (n = 38)	3201 ± 905.9		Ctl (n = 38)	1315 ± 324.5
NL (n = 27)	5145 ± 1168		NL (n = 27)	15046 ± 3559		NL (n = 27)	5648 ± 1009		NL (n = 27)	344.8 ± 652.8		NL (n = 27)	3198 ± 1145		NL (n = 27)	1365 ± 569.6
	p value			p value			p value			p value			p value			p value
	**padj = 0.006			padj = 0.469			***padj = 0.003			**padj = 0.002			padj = 0.987			padj = 0.737

## Sheet: Figure 5D
Mann-Whitney test
Krt5			Krt10			Krt14			Krt16			Filaggrin			Loricrin
WT	KO		WT	KO		WT	KO		WT	KO		WT	KO		WT	KO
0.891947	0.993302		0.8998	1.14289		0.894652	1.15989		1.07071	5.52622		1.02262	1.11259		0.902232	1.15737
0.978811	0.909359		1.03078	1.47825		1.02667	1.39516		0.669375	6.28526		1.27802	1.77989		0.929238	1.06962
0.981258	1.26319		1.12145	1.79077		1.0796	1.6647		0.803254	4.92808		0.855176	2.0964		0.843439	1.06224
0.937343	0.775278		0.920393	0.922164		0.891808	1.0747		0.796946	3.65384		0.988529	0.986402		0.839118	0.803685
1.15353	1.03229		1.11901	1.25395		1.10727	1.30955		1.65972	3.24464		0.850992	1.22046		1.26595	1.04305
0.90218	1.07763		0.979751	1.07466								0.999693	1.58002		1.14708	0.640671
1.14538	1.02052		1.04224	1.11032								1.10142	3.72074		1.0327	0.646175
1.00955	1.09406		0.886565	1.22292								0.903549	3.9458		1.04025	0.57277
	Average ± SD			Average ± SD			Average ± SD			Average ± SD			Average ± SD			Average ± SD
WT (n = 8)	1.000 ± 0.1005		WT (n = 8)	1.000 ± 0.09358		WT (n = 5)	1.000 ± 0.1017		WT (n = 5)	1.000 ± 0.3967		WT (n = 8)	1.000 ± 0.1418		WT (n = 8)	1.000 ± 0.1512
KO (n = 8)	1.021 ± 0.1419		KO (n = 8)	1.249 ± 0.2711		KO (n = 5)	1.321 ± 0.2293		KO (n = 5)	4.728 ± 1.270		KO (n = 8)	2.055 ± 1.158		KO (n = 8)	0.8744 ± 0.2344
	p value			p value			p value			p value			p value			p value
	p = 0.5054			*p = 0.0148			*p = 0.0317			**p = 0.0079			**p = 0.0070			p = 0.5054

## Sheet: Figure 5E
Mann-Whitney test
#Krt5			#Krt10			#Krt14			#Krt16
WT	KO		WT	KO		WT	KO		WT	KO
11	14.6		6.6	9		19.3333	22.3333		18.67	19.67
13.4	15		6.6	8.2		16.3333	19.3333		16.33	19.67
12.8	19.2		5.6	10.4		16	18.3333		17	18
14.6667	17.3333		9	10.3333		16.6667	19.3333		16.67	21.67
15	18.3333		8.33333	11.3333		17	21.6667		18	18.33
	Average ± SD			Average ± SD			Average ± SD			Average ± SD
WT (n = 5)	13.37 ± 1.603		WT (n = 5)	7.227 ± 1.397		WT (n = 5)	17.07 ± 1.321		WT (n = 5)	17.33 ± 0.9733
KO (n = 5)	16.89 ± 2.027		KO (n = 5)	9.853 ± 1.243		KO (n = 5)	20.20 ± 1.709		KO (n = 5)	19.47 ± 1.447
	p value			p value			p value			p value
	*p = 0.0397			*p = 0.0397			*p = 0.0317			*p = 0.0397

## Sheet: Figure 5F
Mann-Whitney test
WT	KO
7.33	5.92
5.18	3.62
4.87	4.33
3.87	4
6.31	4.23
	Average ± SD
WT (n = 5)	5.512 ± 1.338
KO (n = 5)	4.420 ± 0.8818
	p value
	p = 0.2222
