# Supplementary material for: Downregulation of semaphorin 4A in keratinocytes reflects the features of non-lesional psoriasis
Source: eLife. 2024 Dec 31;13:RP97654. doi: 10.7554/eLife.97654 (PMC11687936; doi:10.7554/eLife.97654)
Supplement: Figure 6—source data 1. [file elife-97654-fig6-data1.xlsx]

## Sheet: Figure 6A
Kruskal-Wallis test/ Dunn's multiple comparisons test
p-S6 (Ser235/236)								S6
Upper layer				Lower layer				Upper layer				Lower layer
Ctl	NL	L		Ctl	NL	L		Ctl	NL	L		Ctl	NL	L
113.12	156.082	148.05		116.54	139.87	147.4		99.94	120.648	117.46		106.92	124.16	122.26
100.22	133.732	146.7		98.55	104.14	138.81		100.12	112.371	116.75		105.31	117.08	124.81
111.17	126.74	130.73		116	125.63	125.63		103.81	109.855	112.1		115.12	120	120
103.368	122.106	124.084		94.0467	99.679	134.987		153.275	127.49	125.529		153.275	127.758	125.529
97.809	110.222	118.929		95.5863	102.959	123.788		100.07	147.154	136.549		100.319	162.226	141.204
111.983	123.463	124.723		112.733	102.645	124.29		118.979	139.086	118.412		127.031	140.751	127.002
101.532	106.277	110.159		102.778	97.4293	102.355		118.228	125.573	130.71		127.758	128.139	137.568
108.955	125.105	127.174		117.315	119.231	128.376		148.301	108.666	109.726		124.259	115.848	114.061
123.788	111.289	113.696		123.65	102.934	111.546		110.723	115.913	114.725		124.431	127.08	124.67
	Average ± SD				Average ± SD				Average ± SD				Average ± SD
Ctl (n = 9)	108.0 ± 8.139			Ctl (n = 9)	108.6 ± 10.92			Ctl (n = 9)	117.0 ± 20.55			Ctl (n = 9)	120.5 ± 16.01
NL (n-9)	123.9 ± 15.01			NL (n-9)	110.5 ± 14.46			NL (n-9)	123.0 ± 13.30			NL (n-9)	129.2 ± 14.44
L (n = 9)	127.1 ± 13.15			L (n = 9)	126.4 ± 13.62			L (n = 9)	120.2 ± 8.903			L (n = 9)	126.3 ± 8.373
	p value				p value				p value				p value
Ctl vs NL	*p = 0.0485			Ctl vs NL	p > 0.9999			Ctl vs NL	p = 0.7404			Ctl vs NL	p = 0.5586
Ctl vs L	**p = 0.0074			Ctl vs L	*p = 0.0306			Ctl vs L	p > 0.9999			Ctl vs L	p > 0.9999
NL vs L	p > 0.9999			NL vs L	p = 0.1303			NL vs L	p > 0.9999			NL vs L	p > 0.9999

## Sheet: Figure 6B
Mann-Whitney test
p-S6 (Ser235/236)			p-Akt(Ser473)
WT	KO		WT	KO
72.6612	78.2112		115.862	119.99
74.7726	83.6188		113.967	115.9
69.4032	77.423		115.739	116.738
76.5592	83.4076		113.889	114.677
75.853	81.9002		112.647	120.053
78.4764	82.006		107.994	116.714
86.1408	81.726		108.657	110.25
72.654	78.6396		112.104	115.825
	Average ± SD			Average ± SD
WT (n = 8)	75.82 ± 5.020		WT (n = 8)	112.6 ± 2.953
KO (n = 8)	80.87 ± 2.420		KO (n = 8)	116.3 ± 3.109
	p value			p value
	*p = 0.0207			*p = 0.0148

## Sheet: Figure 6C
Mann-Whitney test
p-S6 (Ser235/236)			p-Akt(Ser473)			S6			Akt
WT	KO		WT	KO		WT	KO		WT	KO
1.49262	1.26459		1.26652	1.85613		2.21609	1.31085		0.954065	0.975259
0.755869	1.73589		0.169928	3.98529		0.500625	1.91546		1.04868	1.21308
0.899143	2.11144		2.06099	1.98574		0.885969	2.68109		1.20802	1.47595
1.04723	2.40272		0.887828	1.9404		0.74615	4.36195		1.05793	1.06983
0.80514	2.1412		0.614728			0.651171	3.35262		0.731299
	Average ± SD			Average ± SD			Average ± SD			Average ± SD
WT (n = 5)	1.000 ± 0.2969		WT (n = 5)	1.000 ± 0.7153		WT (n = 5)	1.000 ± 0.6941		WT (n = 5)	1.000 ± 0.1756
KO (n = 5)	1.931 ± 0.4420		KO (n = 4)	2.442 ± 1.030		KO (n = 5)	2.724 ± 1.197		KO (n = 4)	1.184 ± 0.2181
	p value			p value			p value			p value
	*p = 0.0159			p = 0.1111			*p = 0.0317			p = 0.1905

## Sheet: Figure 6D
Mann-Whitney test
p-S6 (Ser235/236)			p-Akt(Ser473)			S6			Akt
WT	KO		WT	KO		WT	KO		WT	KO
0.464363	1.16467		0.588113	3.32274		0.499702	1.19808		0.891722	0.940794
0.937686	1.49618		1.40613	1.5433		0.93742	1.60301		1.18495	1.233
0.959775	1.71051		1.11599	4.41517		0.808702	1.99791		1.24406	0.995869
1.23108	1.5561		0.753697	5.15156		1.35004	1.22735		0.973986	1.11095
1.4071	1.48541		1.13607	3.4014		1.40414	1.36699		0.705279	1.21283
	Average ± SD			Average ± SD			Average ± SD			Average ± SD
WT (n = 5)	1.000 ± 0.3576		WT (n = 5)	1.000 ± 0.3268		WT (n = 5)	1.000 ± 0.3797		WT (n = 5)	1.000 ± 0.2197
KO (n = 5)	1.483 ± 0.1991		KO (n = 5)	3.567 ± 1.361		KO (n = 5)	1.479 ± 0.3314		KO (n = 5)	1.099 ± 0.1292
	p value			p value			p value			p value
	*p = 0.0317			**p = 0.0079			p = 0.1508			p = 0.5476
