# Supplementary material for: Downregulation of semaphorin 4A in keratinocytes reflects the features of non-lesional psoriasis
Source: eLife. 2024 Dec 31;13:RP97654. doi: 10.7554/eLife.97654 (PMC11687936; doi:10.7554/eLife.97654)
Supplement: Figure 7—figure supplement 1—source data 1. [file elife-97654-fig7-figsupp1-data1.xlsx]

## Sheet: Figure 7-figure supplement 1A
Mann-Whitney test
Ctl gel	Rapamycin gel
14.2	11.9
14.8	16.6
15.6	15.9
15.3	16.5
14.7	13.8
18	15.1
14.1	19.1
19	16.2
11.5	15.1
13	17.5
	Average ± SD
Ctl gel (n = 10)	15.02 ± 2.193
Rapamycin gel (n = 10)	15.77 ± 1.979
	p value
	p = 0.2709

## Sheet: Figure 7-figure supplement 1B
Mann-Whitney test
Krt5			Krt10			Krt14			Krt16			Il17a
Ctl gel	Rapamycin gel		Ctl gel	Rapamycin gel		Ctl gel	Rapamycin gel		Ctl gel	Rapamycin gel		Ctl gel	Rapamycin gel
0.902429	1.24858		0.876263	0.880836		0.80928	0.885456		1.44558	0.260369		0.597388	0.84778
0.954079	1.19642		0.912048	1.09265		0.865731	1.04604		0.425844	0.333743		0.600375	0.54729
0.909771	1.23415		0.988124	1.14931		0.949459	1.04263		1.17439	0.29638		0.660599	1.33848
1.0565	1.04723		1.16814	0.773356		1.06895	0.772671		0.24674	0.277092		2.3966	1.62063
1.01108	1.24966		1.06218	0.857464		1.02423	0.82842		0.47171	0.390999		1.25326	0.513502
1.08064	1.07634		0.952838	0.863109		1.01883	0.927437		2.43627	0.427156		0.547308	0.772865
1.04487	1.14543		1.0897	0.9809		1.15287	1.02099		0.348668	0.370168		0.926324	0.62224
1.15528	1.19604		1.12369	1.04555		1.21002	1.1012		0.403515	0.324514		1.4147	1.10693
0.914711	1.06215		0.923059	0.943323		0.954271	1.05027		1.82194	0.507077		0.604893	0.452851
0.970639	1.02487		0.903949	0.891551		0.946361	0.946124		1.22535	0.319495		0.998557	0.345211
	Average ± SD			Average ± SD			Average ± SD			Average ± SD			Average ± SD
Ctl gel (n = 10)	1.000 ± 0.08841		Ctl gel (n = 10)	1.000 ± 0.1033		Ctl gel (n = 10)	1.000 ± 0.1225		Ctl gel (n = 10)	1.000 ± 0.7434		Ctl gel (n = 10)	1.000 ± 0.5764
Rapamycin gel (n = 10)	1.148 ± 0.08841		Rapamycin gel (n = 10)	0.9478 ± 0.1182		Rapamycin gel (n = 10)	0.9621 ± 0.1081		Rapamycin gel (n = 10)	0.3507 ± 0.07511		Rapamycin gel (n = 10)	0.8168 ± 0.4167
	p value			p value			p value			p value			p value
	**p = 0.0029			p = 0.2475			p = 0.5787			*p = 0.0185			p = 0.3930

## Sheet: Figure 7-figure supplement 1C
Mann-Whitney test
# CD3 in Epi			# CD3 in Derm
Ctl gel	Rapamycin gel		Ctl gel	Rapamycin gel
159	145		23	28
186	154		42	27
156	143		27	20
210	139		21	33
133	163		20	23
	Average ± SD			Average ± SD
Ctl gel (n = 5)	168.8 ± 29.73		Ctl gel (n = 5)	26.60 ± 9.017
Rapamycin gel (n = 5)	148.8 ± 9.654		Rapamycin gel (n = 5)	26.20 ± 4.970
	p value			p value
	p = 0.3095			p = 0.7381
