# Supplementary material for: Downregulation of semaphorin 4A in keratinocytes reflects the features of non-lesional psoriasis
Source: eLife. 2024 Dec 31;13:RP97654. doi: 10.7554/eLife.97654 (PMC11687936; doi:10.7554/eLife.97654)
Supplement: Figure 7—figure supplement 2—source data 1. [file elife-97654-fig7-figsupp2-data1.xlsx]

## Sheet: Figure 7-figure supplement 2B
Mann-Whitney test
Ctl	Rapamycin
26.5	23.8
36.9	22.1
31.1	17.2
21.9	18.4
24.3	23.3
28.1	14.2
44.6	22.5
52.9	31.3
41.3	34.4
51.1	34.6
	34.9
	30.7
Ctl (n = 10)	Average ± SD
Rapamycin (n = 12)	35.87 ± 11.2
	25.62 ± 7.3
	p value
	*p = 0.0358

## Sheet: Figure 7-figure supplement 2C
Mann-Whitney test
Krt5			Krt10			Krt14			Krt16			Il17a
Ctl	Rapamycin		Ctl	Rapamycin		Ctl	Rapamycin		Ctl	Rapamycin		Ctl	Rapamycin
1.15057	0.85811		1.53414	0.690862		1.26929	0.664738		0.703439	0.549983		0.183904	0.155554
0.968044	0.956469		0.874035	0.665204		0.784593	0.663037		0.910055	0.763971		0.665828	1.01275
0.90307	1.00536		1.15279	0.490076		1.05953	0.482182		0.773114	0.720332		0.649693	0.967995
0.8658	0.696634		0.708324	0.584308		0.667452	0.531802		1.12492	0.590865		0.876657	1.0884
0.889807	0.766954		1.213	0.709402		1.14963	0.643348		0.808539	0.509693		0.591196	0.469755
1.04168	1.07794		0.955401	1.00206		0.913182	0.880895		0.737886	0.697636		0.701865	0.617546
0.940215	0.863933		0.724906	0.557744		0.857159	0.511516		1.27368	0.583194		0.86616	0.415045
0.902343	1.15074		0.72982	0.494009		0.866839	0.581222		1.20372	0.500761		2.92141	0.732823
1.05402	1.31324		0.89725	1.2353		1.03154	1.42395		1.24172	0.733488		1.46068	0.555566
1.28444	1.14346		1.21034	0.827129		1.40078	0.985565		1.22293	0.847022		1.08261	0.748998
	1.05936			0.781554			0.912152			0.706093			0.431069
	1.09089			0.64086			0.729516			1.04575			0.939227
	Average ± SD			Average ± SD			Average ± SD			Average ± SD			Average ± SD
Ctl (n = 10)	1.000 ± 0.1341		Ctl (n = 10)	1.000 ± 0.2709		Ctl (n = 10)	1.000 ± 0.2267		Ctl (n = 10)	1.000 ± 0.2340		Ctl (n = 10)	1.000 ± 0.7528
Rapamycin (n = 12)	0.9986 ± 0.1774		Rapamycin (n = 12)	0.7232 ± 0.2172		Rapamycin (n = 12)	0.7508 ± 0.2670		Rapamycin (n = 12)	0.6874 ± 0.1564		Rapamycin (n = 12)	0.6779 ± 0.2870
	p value			p value			p value			p value			p value
	p = 0.9229			*p = 0.0112			*p = 0.0169			**p = 0.0015			p = 0.3463

## Sheet: Figure 7-figure supplement 2D
Mann-Whitney test
# CD3 in Epi			# CD3 in Derm
Ctl	Rapamycin		Ctl	Rapamycin
123	84		33	44
109	67		63	25
131	96		52	53
126	86		43	51
169	76		25	26
119	106		26	19
111	143		17	21
100	69		34	29
107	76		29	24
125	93		26	17
	87			29
	77			20
	Average ± SD			Average ± SD
Ctl (n = 10)	122.0 ± 19.22		Ctl (n = 10)	34.80 ± 14.00
Rapamycin (n = 12)	88.33 ± 20.60		Rapamycin (n = 12)	29.83 ± 12.49
	p value			p value
	***p = 0.0004			p = 0.2742
