# Supplementary material for: Downregulation of semaphorin 4A in keratinocytes reflects the features of non-lesional psoriasis
Source: eLife. 2024 Dec 31;13:RP97654. doi: 10.7554/eLife.97654 (PMC11687936; doi:10.7554/eLife.97654)
Supplement: Figure 7—source data 1. [file elife-97654-fig7-data1.xlsx]

## Sheet: Figure 7A
Mann-Whitney test
Ctl	Rapamycin
14.9	12.7
16.2	14.3
13.7	16.6
15.6	15.1
13.5	13.4
	Average ± SD
Ctl (n = 5)	14.78 ± 1.173
Rapamycin (n = 5)	14.42 ± 1.519
	p value
	p = 0.6905

## Sheet: Figure 7B
Mann-Whitney test
Ctl	JR-AB2-011
13	11.9
17.6	14.8
13.6	13.3
16.5	16.4
14.3	15.6
	Average ± SD
Ctl (n = 5)	15.00 ± 1.966
JR-AB2-011 (n = 5)	14.40 ± 1.807
	p value
	p = 0.6905

## Sheet: Figure 7C
Mann-Whitney test
Krt5			Krt10			Krt14			Krt16			Il17a
Ctl	Rapamycin		Ctl	Rapamycin		Ctl	Rapamycin		Ctl	Rapamycin		Ctl	Rapamycin
0.912786	1.24148		1.01309	0.963113		0.999839	0.93968		1.76656	0.222487		1.85275	1.82311
0.96049	1.48016		1.03568	1.31743		1.00839	1.09144		0.615556	0.408491		0.386319	0.338363
0.97517	1.42946		1.08764	1.0505		1.05784	0.980783		0.753007	0.119225		0.604457	0.400244
0.991643	1.16992		0.93181	0.860528		0.948321	0.847644		0.91753	0.187761		0.873704	0.622514
1.15991	1.34126		0.931781	0.89809		0.985616	0.915082		0.947351	0.159189		1.28277	0.367501
	Average ± SD			Average ± SD			Average ± SD			Average ± SD			Average ± SD
WT (n = 5)	1.000 ± 0.09411		WT (n = 5)	1.000 ± 0.06788		WT (n = 5)	1.000 ± 0.03966		WT (n = 5)	1.000 ± 0.4489		WT (n = 5)	1.000 ± 0.5823
Rapamycin (n = 5)	1.332 ± 0.1285		Rapamycin (n = 5)	1.018 ± 0.1823		Rapamycin (n = 5)	0.9549 ± 0.09032		Rapamycin (n = 5)	0.2194 ± 0.1123		Rapamycin (n = 5)	0.7103 ± 0.6321
	p value			p value			p value			p value			p value
	**p = 0.0079			p = 0.8413			p = 0.2222			**p = 0.0079			p = 0.3095

## Sheet: Figure 7D
Mann-Whitney test
# CD3 in Epi			# CD3 in Derm
Ctl	Rapamycin		Ctl	Rapamycin
135.9	114.6		24.8	17
123.1	120.3		31.8	23.4
118.9	91.3		22.6	25.5
148.6	83.5		33.3	39.6
135.2	118.2		30.4	28.3
	Average ± SD			Average ± SD
WT (n = 5)	132.3 ± 11.74		WT (n = 5)	28.58 ± 4.37
Rapamycin (n = 5)	105.6 ± 16.95		Rapamycin (n = 5)	26.76 ± 8.297
	p value			p value
	*p = 0.0159			p = 0.6905

## Sheet: Figure 7E
Mann-Whitney test
Krt5			Krt10			Krt14			Krt16			Il17a
Ctl	JR-AB2-011		Ctl	JR-AB2-011		Ctl	JR-AB2-011		Ctl	JR-AB2-011		Ctl	JR-AB2-011
0.848979	0.818325		1.01235	0.647448		1.03674	0.649955		1.6044	2.76937		1.2614	0.854797
0.953173	0.91691		1.1042	0.718896		1.09399	0.723342		0.265151	0.831523		1.11715	1.39773
1.24479	0.678687		1.14721	0.455011		1.15828	0.582028		1.41669	3.42702		0.746681	2.22233
0.974737	0.812574		0.876325	0.726307		0.846718	0.755602		0.663162	2.05232		1.29616	0.446573
0.978317	0.778596		0.859916	0.645582		0.864274	0.655657		1.0506	2.40476		0.578613	1.69929
	Average ± SD			Average ± SD			Average ± SD			Average ± SD			Average ± SD
Ctl (n = 5)	1.000 ± 0.1467		Ctl (n = 5)	1.000 ± 0.1300		Ctl (n = 5)	1.000 ± 0.1389		Ctl (n = 5)	1.000 ± 0.5466		Ctl (n = 5)	1.000 ± 0.3207
JR-AB2-011 (n = 5)	0.8010 ± 0.08563		JR-AB2-011 (n = 5)	0.6386 ± 0.1095		JR-AB2-011 (n = 5)	0.6733 ± 0.06794		JR-AB2-011 (n = 5)	2.297 ± 0.9643		JR-AB2-011 (n = 5)	1.324 ± 0.6970
	p value			p value			p value			p value			p value
	*p = 0.0159			**p = 0.0079			**p = 0.0079			p = 0.0556			p = 0.4206

## Sheet: Figure 7F
Mann-Whitney test
# CD3 in Epi			# CD3 in Derm
Ctl	JR-AB2-011		Ctl	JR-AB2-011
115.4	127.4		27.6	14.2
97.7	113.2		14.9	22.6
131.6	105.4		18.4	25.5
132.3	128.8		10.6	8.5
115.4	93.4		7.8	21.2
	Average ± SD			Average ± SD
Ctl (n = 5)	118.5 ± 14.26		Ctl (n = 5)	15.86 ± 7.711
JR-AB2-011 (n = 5)	113.6 ± 14.97		JR-AB2-011 (n = 5)	18.40 ± 6.920
	p value			p value
	p = 0.3968			p = 0.6905
