# Supplementary material for: Downregulation of semaphorin 4A in keratinocytes reflects the features of non-lesional psoriasis
Source: eLife. 2024 Dec 31;13:RP97654. doi: 10.7554/eLife.97654 (PMC11687936; doi:10.7554/eLife.97654)
Supplement: Supplementary file 1. — This table provides patient information used in this study. Psoriasis severity was defined by the total body surface area (BSA) affected: <3% BSA for mild, 3–10% BSA for moderate, and >10% BSA for severe disease. [file elife-97654-supp1.xlsx]

## Sheet: Supplementary File 1
	Fig 1D and E	Analysis of Sema4A expression by immunohistochemistry
	Fig 5-figure supplement 1	Epidermal thickness
		Psoriasis (n = 10)
		Age	Gender	Body site	Severity
		66	Male	Leg	Severe
		55	Male	Trunk	Moderate
		80	Female	Trunk	Severe
		72	Male	Trunk	Moderate
		30	Male	Trunk	Severe
		72	Female	Leg	Moderate
		63	Male	Arm	Mild
		38	Male	Trunk	Mild
		35	Male	Leg	Mild
		71	Male	Trunk	Moderate
		Control (n = 10)
		Age	Gender	Body site
		76	Male	Neck
		52	Female	Leg
		66	Female	Leg
		33	Male	Leg
		68	Female	Trunk
		57	Female	Leg
		65	Male	Trunk
		41	Female	Trunk
		51	Female	Trunk
		66	Female	Trunk
	Fig 1F	Analysis of Sema4A expression by qRT-PCR
		Epidermis
		Psoriasis (n = 7)
		Age	Gender	Body site	Severity
		71	Male	Leg	Moderate
		76	Female	Neck	Mild
		38	Female	Trunk	Moderate
		49	Female	Trunk	Moderate
		61	Male	Arm	Mild
		68	Female	Trunk	Moderate
		72	Male	Leg	Mild
		Control (n = 10)
		Age	Gender	Body site
		57	Female	Leg
		69	Female	Trunk
		66	Female	Trunk
		86	Female	Trunk
		53	Female	Trunk
		84	Male	Neck
		37	Female	Trunk
		46	Female	Trunk
		51	Female	Trunk
		46	Female	Trunk
		Dermis
		Psoriasis (n = 6)
		Age	Gender	Body site	Severity
		76	Female	Neck	Mild
		38	Female	Trunk	Moderate
		49	Female	Trunk	Moderate
		61	Male	Arm	Severe
		68	Female	Trunk	Moderate
		72	Male	Leg	Severe
		Control (n = 6)
		Age	Gender	Body site
		69	Female	Trunk
		86	Female	Trunk
		84	Male	Neck
		37	Female	Trunk
		51	Female	Trunk
		46	Female	Trunk
	Fig 1G	Analysis of Sema4A expression by flow cytometry
				Cell type			Average of age	Male (n = )	Female (n = )
		Psoriasis (n = 13)		CD4 T cell, CD8 T cell, and monocyte			56.1	9	4
		Control (n = 13)		CD4 T cell and CD8 T cell			52.2	6	7
		Control (n = 11)		Monocyte			54.1	6	5
	Fig 1H	Analysis of Serum Sema4A by ELISA
				Average of age	Male (n = )	Female (n = )
		Psoriasis (n = 60)		55.3	43	17
		Control (n = 20)		52.1	11	9
	Fig 6A	Pictures of p-S6, S6, p-Akt, and Akt staining
		Psoriasis (n = 1)
		Age	Gender	Body site	Severity
		30	Male	Trunk	Severe
		Control (n = 1)
		Age	Gender	Body site
		66	Female	Trunk
		Analysis of p-S6, S6 expression by immunohistochemistry
		Psoriasis (n = 9)
		Age	Gender	Body site	Severity
		66	Male	Leg	Severe
		55	Male	Trunk	Moderate
		80	Female	Trunk	Severe
		72	Male	Trunk	Moderate
		30	Male	Trunk	Severe
		72	Female	Leg	Moderate
		38	Male	Trunk	Mild
		35	Male	Leg	Mild
		71	Male	Trunk	Moderate
		Control (n = 9)
		Age	Gender	Body site
		76	Male	Neck
		66	Female	Leg
		33	Male	Leg
		68	Female	Trunk
		57	Female	Leg
		65	Male	Trunk
		41	Female	Trunk
		51	Female	Trunk
		66	Female	Trunk
