# Supplementary material for: Downregulation of semaphorin 4A in keratinocytes reflects the features of non-lesional psoriasis
Source: eLife. 2024 Dec 31;13:RP97654. doi: 10.7554/eLife.97654 (PMC11687936; doi:10.7554/eLife.97654)
Supplement: Supplementary file 2. [file elife-97654-supp2.xlsx]

## Sheet: Supplementary File 2
Target	Clone	Species	Supplier	Catalog	Dilution ratio		Incubation time	Incubation temperature
					IHC, IF	WB
Sema4A	Polyclonal	Rabbit	Abcam	ab70178	100		30 min	RT
phospho-S6 (Ser235/236)	D57.2.2E	Rabbit	Cell Signaling	4858	400	2000	overnight	4 °C
S6	5G10	Rabbit	Cell Signaling	2217	100	1000	overnight	4 °C
phospho-Akt (Ser473)	D9E	Rabbit	Cell Signaling	4060	50	1000	overnight	4 °C
Akt	C67E7	Rabbit	Cell Signaling	4691	300	1000	overnight	4 °C
Keratin 5	Polyclonal	Rabbit	BioLegend	905503	800		overnight	4 °C
Keratin 10	Polyclonal	Rabbit	BioLegend	905403	400		overnight	4 °C
Keratin 14	Polyclonal	Rabbit	BioLegend	905303	400		overnight	4 °C
Cytokeratin 16	8L6R4	Rabbit	Invitrogen	MA5-42892	100		overnight	4 °C
CD3	CD3-12	Rat	Bio-Rad	MCA1477	100		overnight	4 °C
Rabbit IgG H&L (Alexa Fluor 555)	Polyclonal	Donkey	Abcam	ab150074	1000		30 min	RT
Rat IgG H&L (Alexa Fluor 555)	Polyclonal	Donkey	Abcam	ab150154	1000		30 min	RT
β-actin	AC-15	Mouse	Sigma-Aldrich	A5441		5000	overnight	4 °C
Anti-Mouse IgG, HRP-Linked Whole Ab	Monoclonal secondary	Sheep	Cytiva	NA931		10000	1 hour	RT
Anti-Rabbit IgG, HRP-Linked Whole Ab	Polyclonal secondary	Donkey	Cytiva	NA934		10000	1 hour	RT
RT: Room temperature
IHC: immunohistochemistry
IF: immunofluorescence
WB: western blot
