# Supplementary material for: Downregulation of semaphorin 4A in keratinocytes reflects the features of non-lesional psoriasis
Source: eLife. 2024 Dec 31;13:RP97654. doi: 10.7554/eLife.97654 (PMC11687936; doi:10.7554/eLife.97654)
Supplement: Supplementary file 3. [file elife-97654-supp3.xlsx]

## Sheet: Supplementary File 3
Primer sequences for real-time quantitative PCR in human samples
Gene Symbol	Forward primer (5'-3')	Reverse primer (5'-3')
GAPDH	GTCTCCTCTGACTTCAACAGCG	ACCACCCTGTTGCTGTAGCCAA
SEMA4A	TCTGCTCCTGAGTGGTGATG	AAACCAGGACACGGATGAAG
Primer sequences for real-time quantitative PCR in murine samples
Gene Symbol	Forward primer (5'-3')	Reverse primer (5'-3')
Gapdh	TGTGTCCGTCGTGGATCTGA	TTGCTGTTGAAGTCGCAGGAG
Krt5	CAGAGCTGAGGAACATGCAG	CATTCTCAGCCGTGGTACG
Krt10	CGTACTGTTCAGGGTCTGGAG	GCTTCCAGCGATTGTTTCA
Krt14	CGTACTGTTCAGGGTCTGGAG	GCTTCCAGCGATTGTTTCA
Krt16	TGAGCTGACCCTGTCCAGA	TGAGCTGACCCTGTCCAGA
Filaggrin	GGAGGCATGGTGGAACTGA	TGTTTATCTTTTCCCTCACTTCTACATC
Loricrin	TCACTCATCTTCCCTGGTGCTT	GTCTTTCCACAACCCACAGGA
Sema4a	ATGGCCCTACCATCCCTGG	AGCAGCGTGTCAAAGTCTCG
Ccl20	ATGGCCTGCGGTGGCAAGCGT	CATCTTCTTGACTCTTAGGC
S100a8	TGCGATGGTGATAAAAGTGG	GGCCAGAAGCTCTGCTACTC
S100a9	CACCCTGAGCAAGAAGGAAT	TGTCATTTATGAGGGCTTCATTT
Ifnγ	ATCTGGAGGAACTGGCAAAA	TTCAAGACTTCAAAGAGTCTGAGGTA
Tnfa	GCCTCCCTCTCATCAGTTCT	CACTTGGTGGTTTGCTACGA
Il4	ACAGGAGAAGGGACGCCAT	GAAGCCCTACAGACGAGCTCA
Il17a	CTGTGTCTCTGATGCTGTTG	ATGTGGTGGTCCAGCTTTC
Il23	TCCCTACTAGGACTCAGCCAAC	GCTGCCACTGCTGACTAGAA
