# Supplementary material for: Downregulation of semaphorin 4A in keratinocytes reflects the features of non-lesional psoriasis
Source: eLife. 2024 Dec 31;13:RP97654. doi: 10.7554/eLife.97654 (PMC11687936; doi:10.7554/eLife.97654)
Supplement: Supplementary file 4. [file elife-97654-supp4.xlsx]

## Sheet: Supplementary File 4
Target	Clone	Species	Supplier	Catalog
CD3	OKT3	Mouse	BioLegend	317335
CD4	RPA-T4	Mouse	BioLegend	300512
CD8a	RPA-T8	Mouse	eBioscience	47-0088-42
CD11c	3.9	Mouse	BioLegend	301628
SEMA4A	5E3/SEMA4A	Mouse	BioLegend	148404
CD3ε	145-2C11	Armenian Hamster	BioLegend	100328
CD4	GK1.5	Rat	BioLegend	100406
CD8a	53-6.7	Rat	BioLegend	100714
CD16/32	93	Rat	BioLegend	101301
CD69	H1.2F3	Armenian Hamster	BioLegend	104514
CD103	2E7	Armenian Hamster	BioLegend	121422
TCR Vγ2	UC3-10A6	Armenian Hamster	BioLegend	137705
TCR Vγ3	536	Syrian Hamster	BD Biosciences	743241
TCRγδ	GL3	Armenian Hamster	BioLegend	118124
IFNγ	XMG1.2	Rat	BioLegend	505813
IL-4	11B11	Rat	BD Biosciences	562915
IL-17A	TC11-18H10.1	Rat	BioLegend	506925
