# Supplementary material for: Downregulation of semaphorin 4A in keratinocytes reflects the features of non-lesional psoriasis
Source: eLife. 2024 Dec 31;13:RP97654. doi: 10.7554/eLife.97654 (PMC11687936; doi:10.7554/eLife.97654)
Supplement: Supplementary file 5. [file elife-97654-supp5.xlsx]

## Sheet: Table S5 elife
Cytokines	Supplier	Catalog
IL-1β	BioLegend	575102
IL-6	BioLegend	575702
IL-23	BioLegend	589002
TGFβ1	BioLegend	763102
